# Supplementary material for: From benzofuro-, benzothieno- and 10-methylindolo-[2,3-b]-fused benzothiopyrano[4,3,2-de]quinolines to the corresponding benzothiopyrano[4,3,2-de]1,8-naphthyridines: synthesis and properties of these hexacyclic heteroaromatic compounds
Source: Royal Society of Chemistry journal article supplement (doi:10.1039/d2nj04567b), 2022-11-28

## *New Journal of Chemistry*

### **Electronic Supplementary Information**

#### **From benzofuro-, benzothieno- and 10-methylindolo- [2,3-*b*]-fused benzothiopyrano[4,3,2-*de*]quinolines to the corresponding benzothiopyrano[4,3,2-*de*]1,8-naphthyridines: Synthesis and properties of these hexacyclic heteroaromatic compounds**

Nicolas Mast,<sup>a</sup> William Erb,<sup>a,\*</sup> Lionel Nauton,<sup>b</sup> Pascale Moreau,<sup>b,\*</sup> Olivier Mongin,<sup>a</sup> Thierry Roisnel,<sup>a</sup> Margaux Macaigne,<sup>c</sup> Thomas Robert,<sup>c,d</sup> Stéphane Bach,<sup>c,d,e</sup> Laurent Picot,<sup>f</sup> Valérie Thiéry,<sup>f</sup> Jean-Pierre Hurvois,<sup>a</sup> and Florence Mongin<sup>a,\*</sup>

<sup>a</sup> *Univ Rennes, CNRS, ISCR (Institut des Sciences Chimiques de Rennes) - UMR 6226, F-35000 Rennes, France. E-mail: william.erb@univ-rennes1.fr, florence.mongin@univ-rennes1.fr*

<sup>b</sup> *Université Clermont Auvergne, CNRS, Clermont Auvergne INP, ICCF, F-63000 Clermont-Ferrand, France. E-mail: pascale.moreau@uca.fr*

<sup>c</sup> *Sorbonne Université, CNRS, FR2424, Plateforme de criblage KISSf (Kinase Inhibitor Specialized Screening facility), Station Biologique de Roscoff, Place Georges Tessier, 29680 Roscoff, France*

<sup>d</sup> *Sorbonne Université, CNRS, UMR8227, Integrative Biology of Marine Models Laboratory (LBI2M), Station Biologique de Roscoff, 29680 Roscoff, France*

<sup>e</sup> *Centre of Excellence for Pharmaceutical Sciences, North-West University, Private Bag X6001, Potchefstroom 2520, South Africa*

<sup>f</sup> *La Rochelle Université, Laboratoire Littoral Environnement et Sociétés, UMRi CNRS 7266, Université de La Rochelle, 17042 La Rochelle, France*

#### **Table of Contents**

|                                                     |     |
|-----------------------------------------------------|-----|
| NMR spectra                                         | S2  |
| Titration curves for IC <sub>50</sub> determination | S62 |

## NMR spectra

### 1-(*N*-Phthalimido)thioxanthone (3)

$^1\text{H}$  ( $\text{CDCl}_3$ , 300 K, 300 MHz)

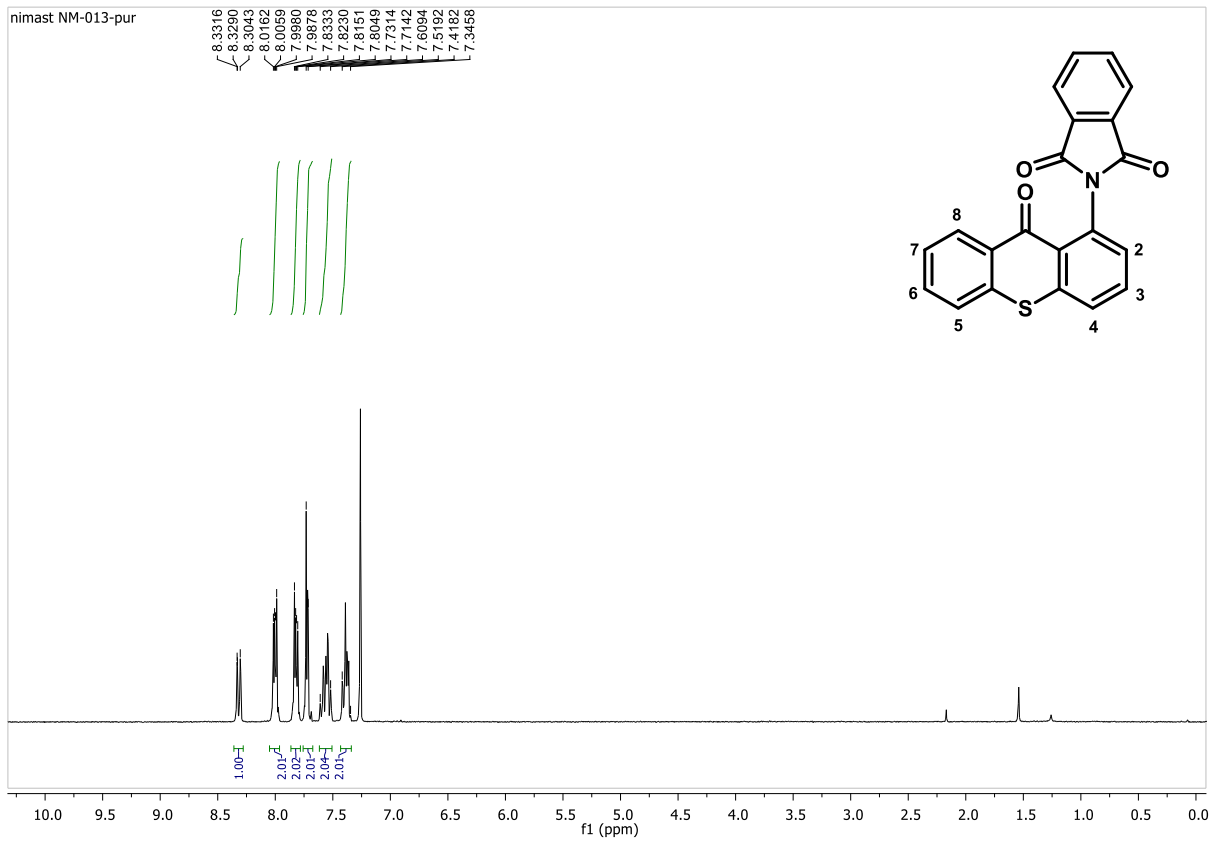

$^{13}\text{C}$  ( $\text{CDCl}_3$ , 300 K, 75 MHz)

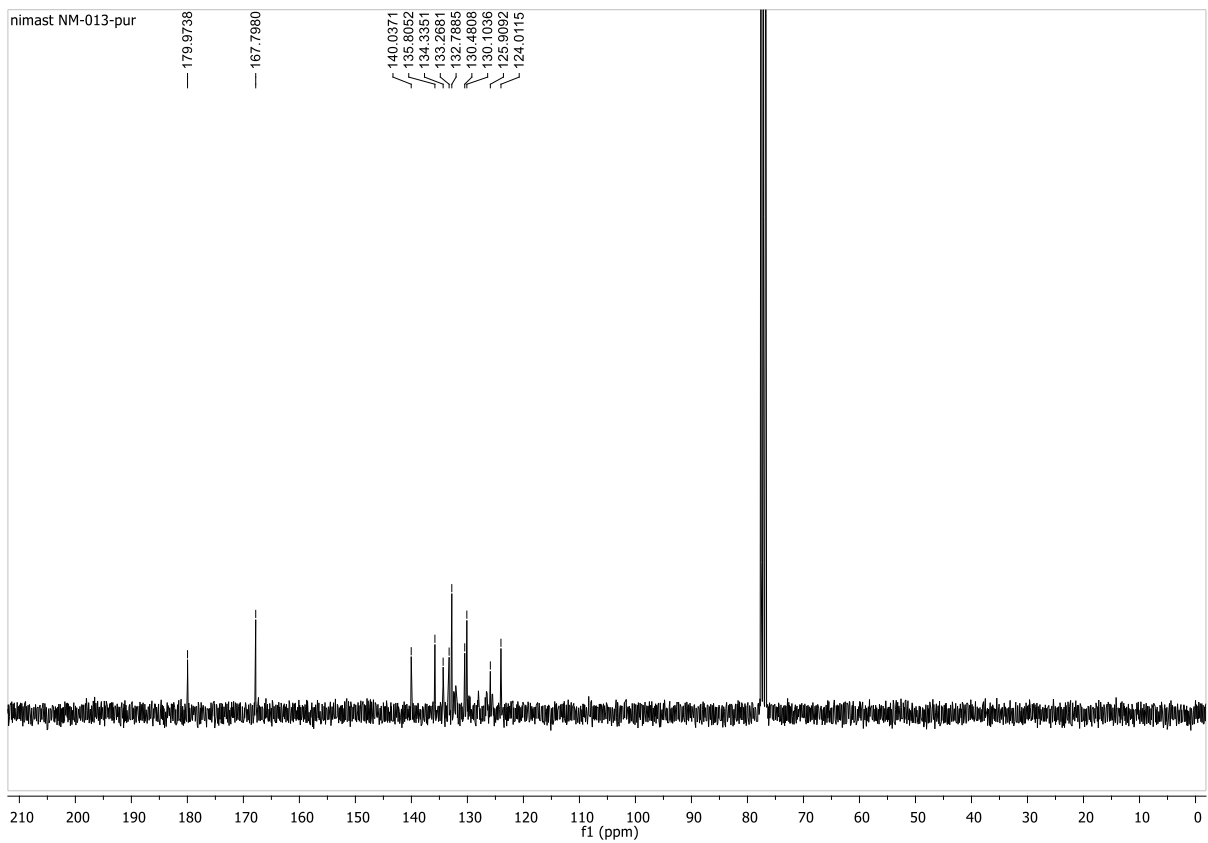

DEPT135 (CDCl<sub>3</sub>, 300 K, 75 MHz)

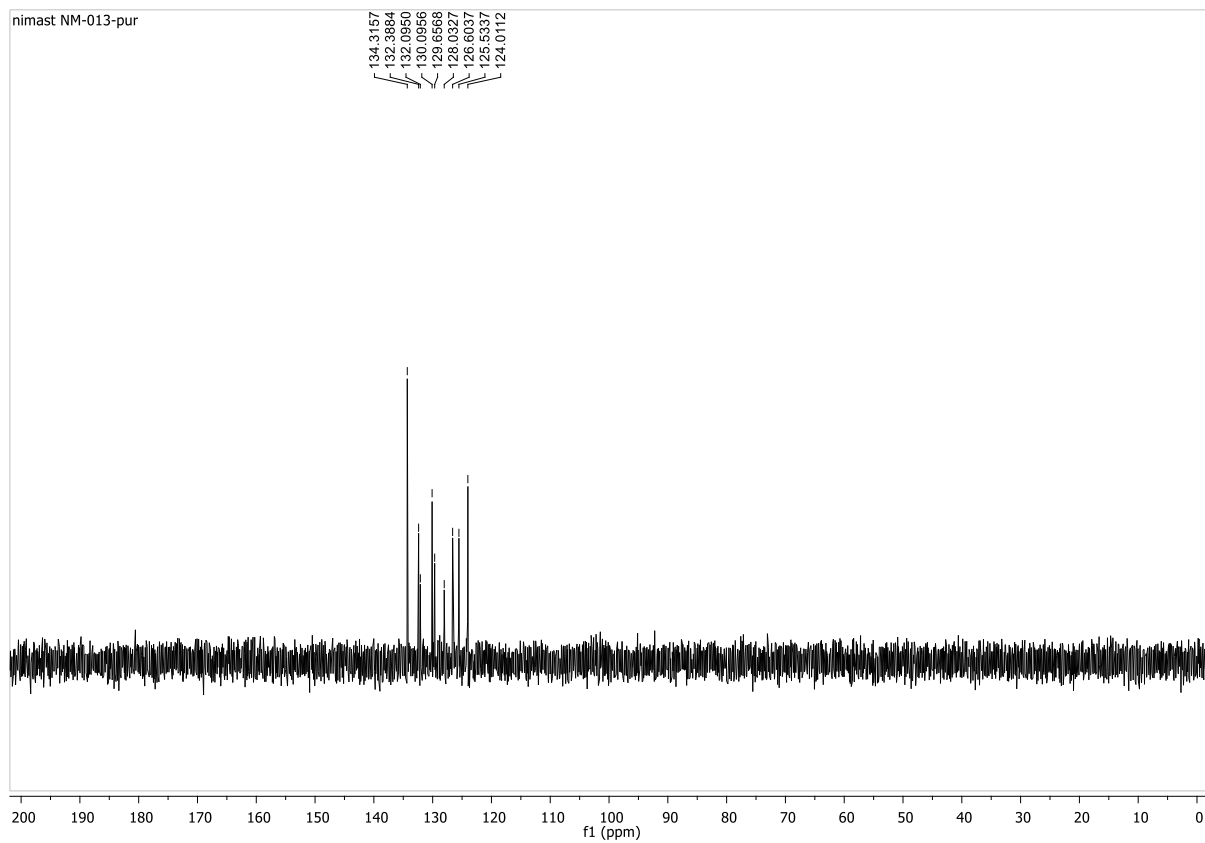

# 1-(2-(Hydrazinocarbonyl)phenylcarbonylamino)thioxanthone (4)

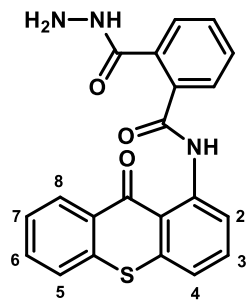

$^1\text{H}$  (( $\text{CD}_3$ ) $_2\text{SO}$ , 300 K, 300 MHz)

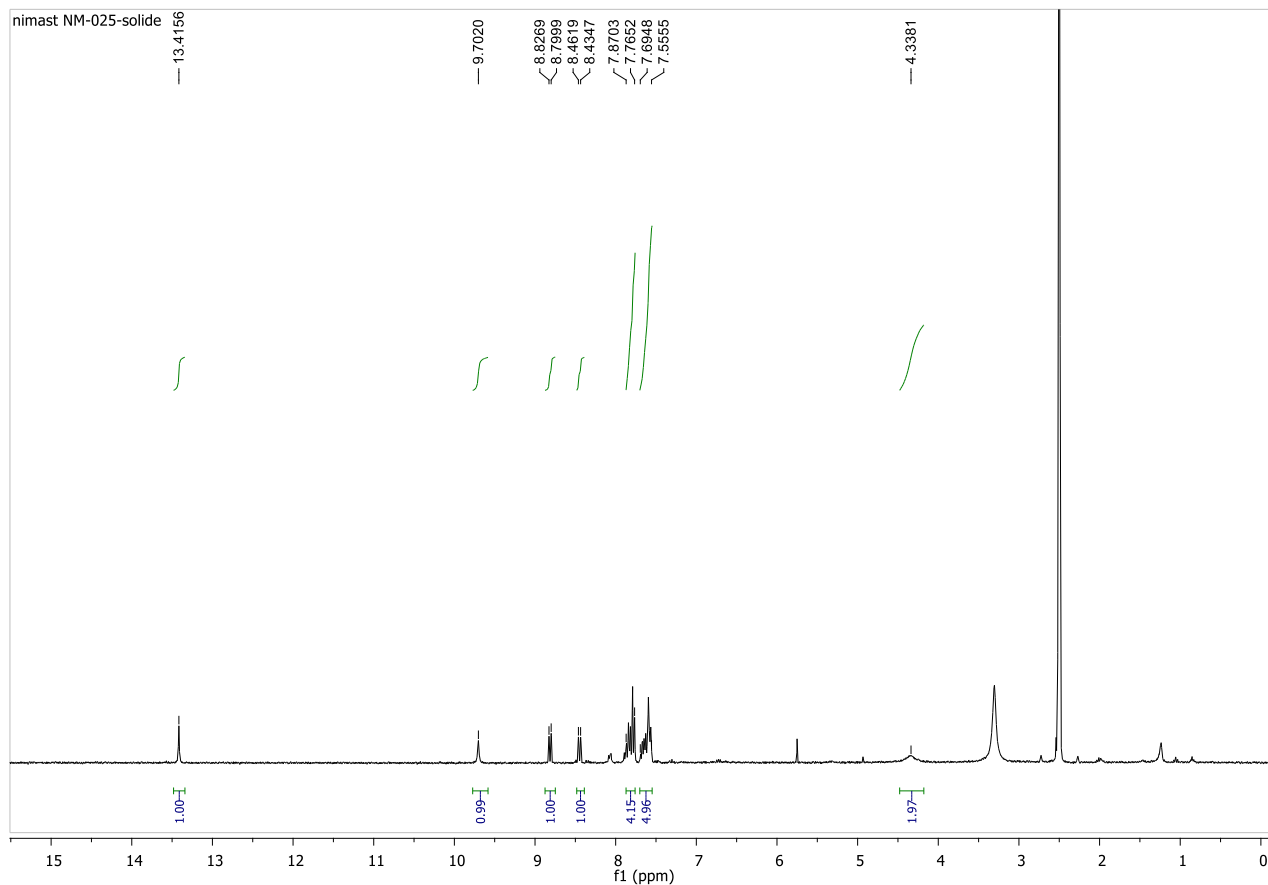

***tert*-Butyl *N*-(3-fluorophenyl)carbamate (5)**

$^1\text{H}$  ( $\text{CDCl}_3$ , 300 K, 300 MHz)

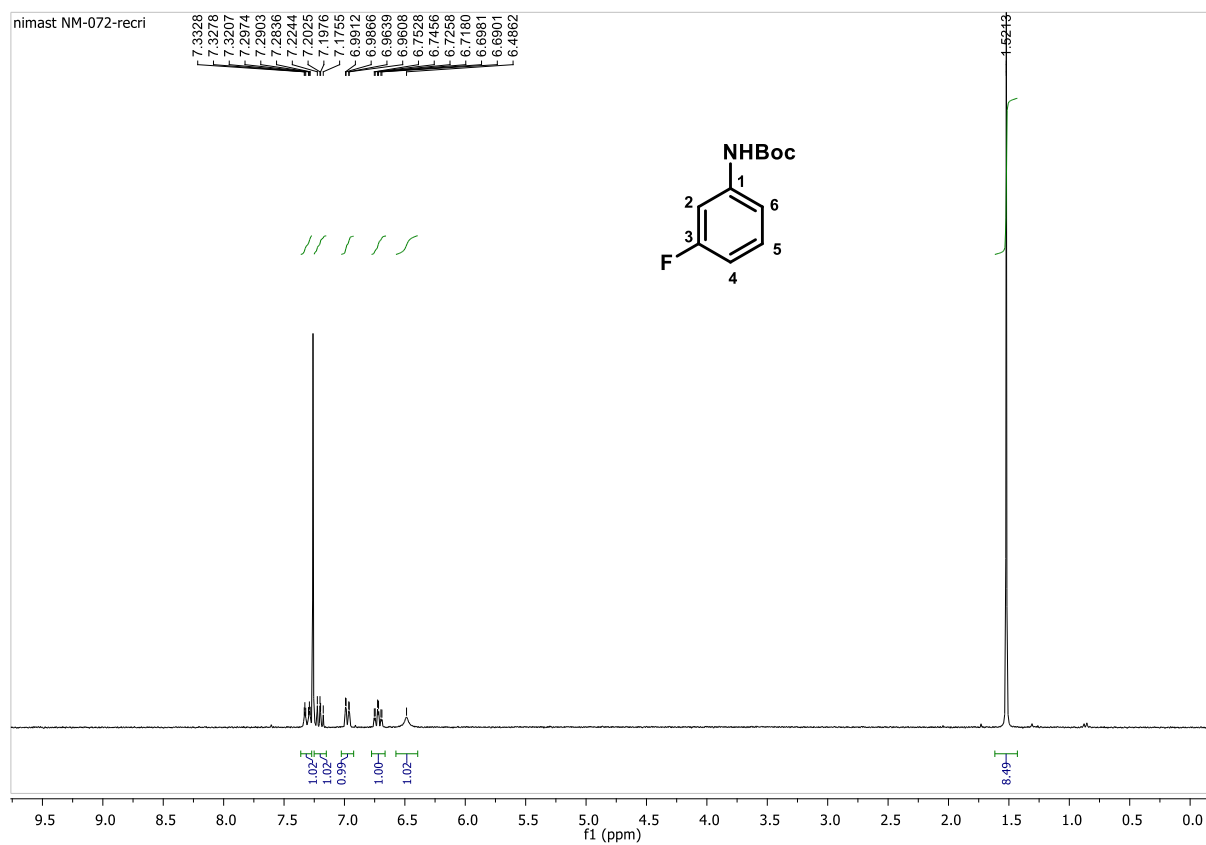

$^{19}\text{F}$  ( $\text{CDCl}_3$ , 300 K, 282 MHz)

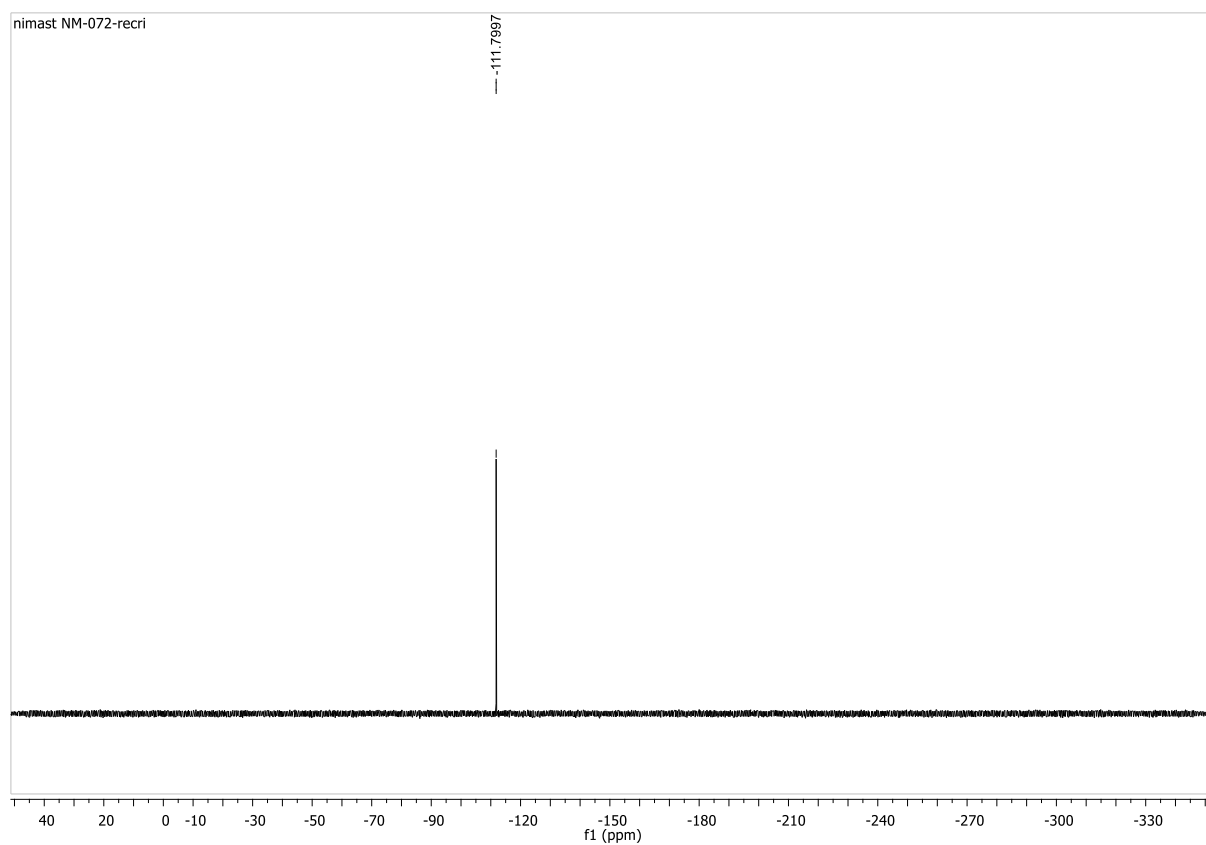

***tert*-Butyl *N*-(3-fluoro-2-((1-(2-fluorophenyl)hydroxymethyl)phenyl)carbamate (6a)**

$^1\text{H}$  ( $\text{CDCl}_3$ , 300 K, 300 MHz)

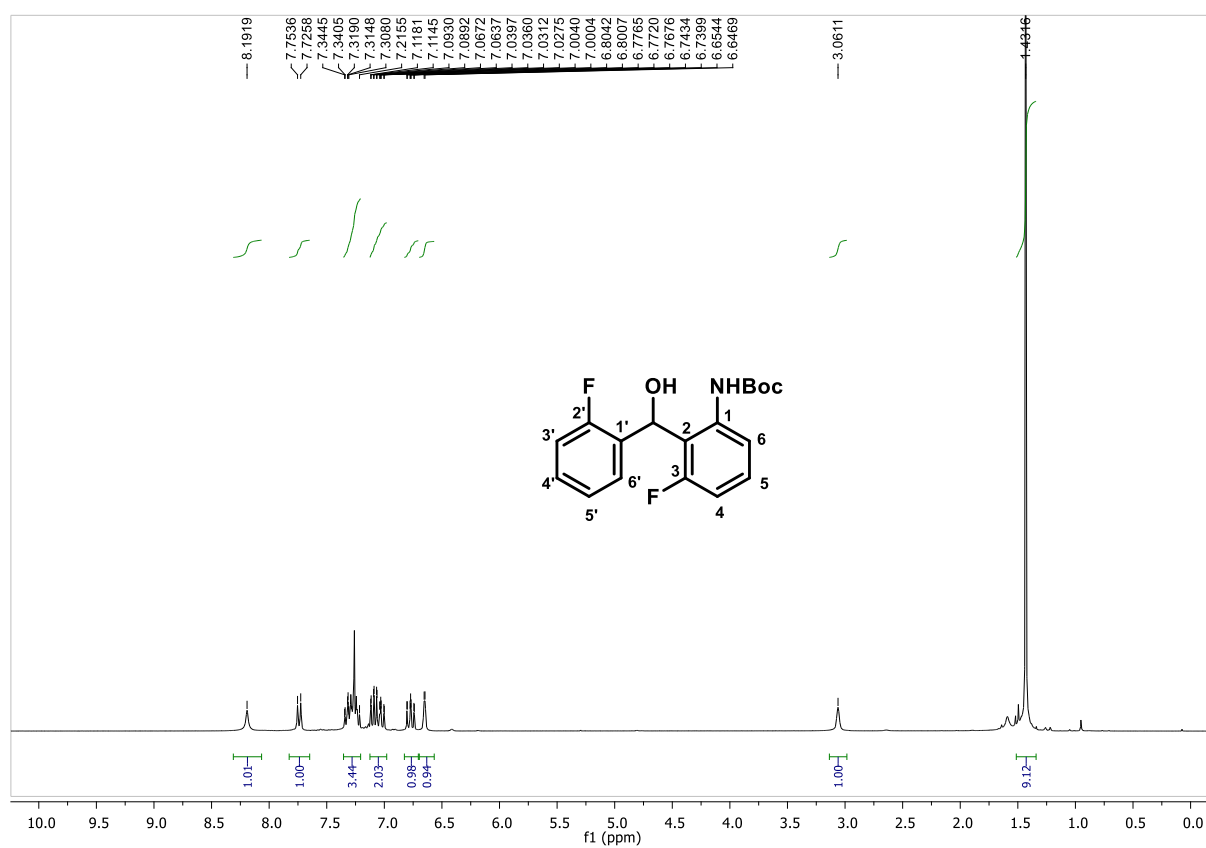

$^{13}\text{C}$  ( $\text{CDCl}_3$ , 300 K, 75 MHz)

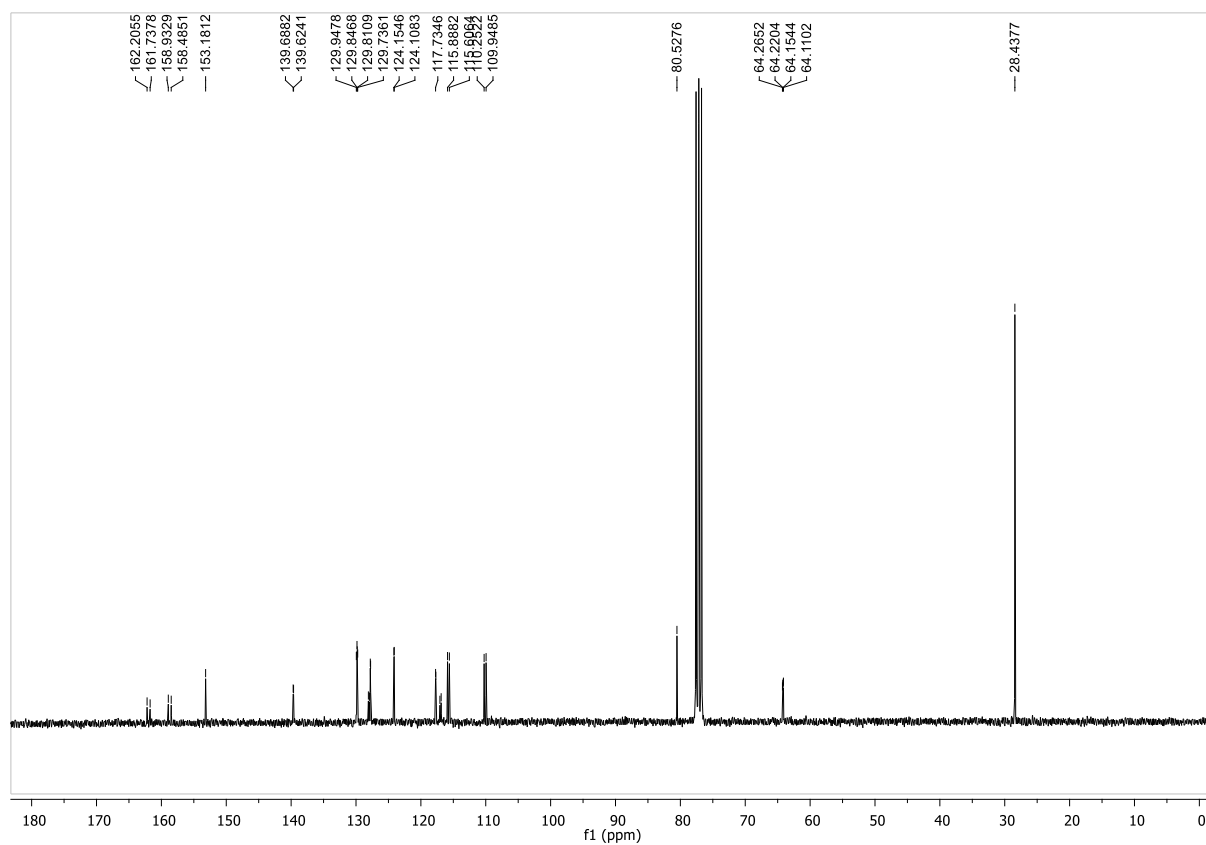

$^{19}\text{F}$  ( $\text{CDCl}_3$ , 300 K, 471 MHz)

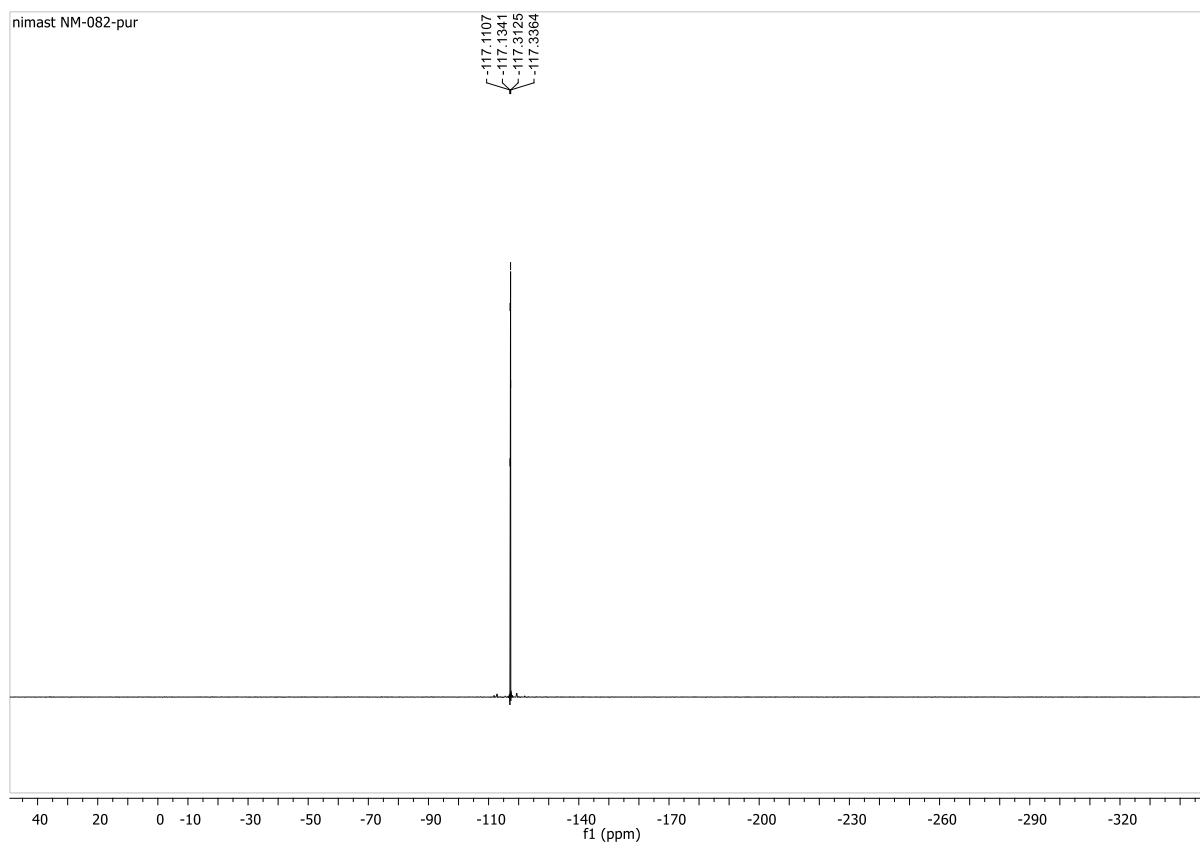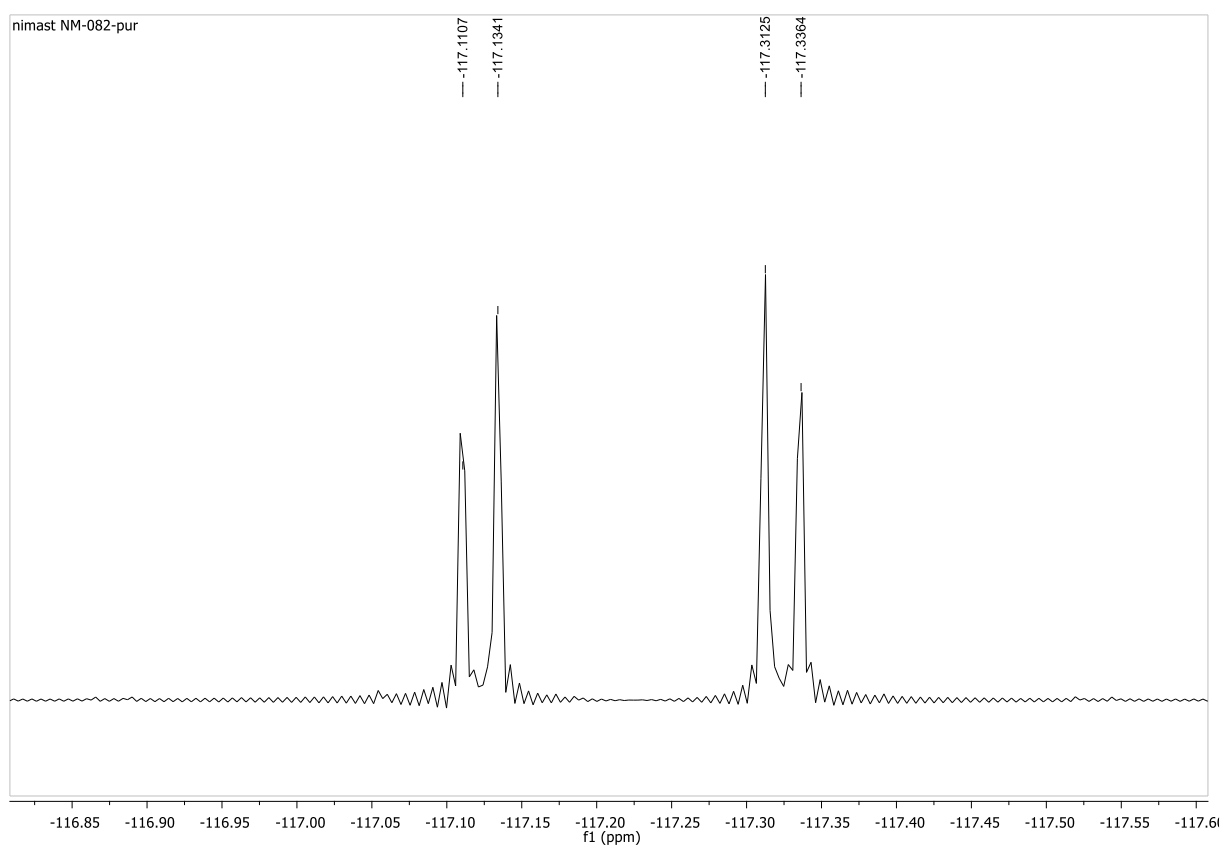

***tert*-Butyl *N*-(3-fluoro-2-(2-fluorobenzoyl)phenyl)carbamate (7)**

$^1\text{H}$  ( $\text{CDCl}_3$ , 300 K, 300 MHz)

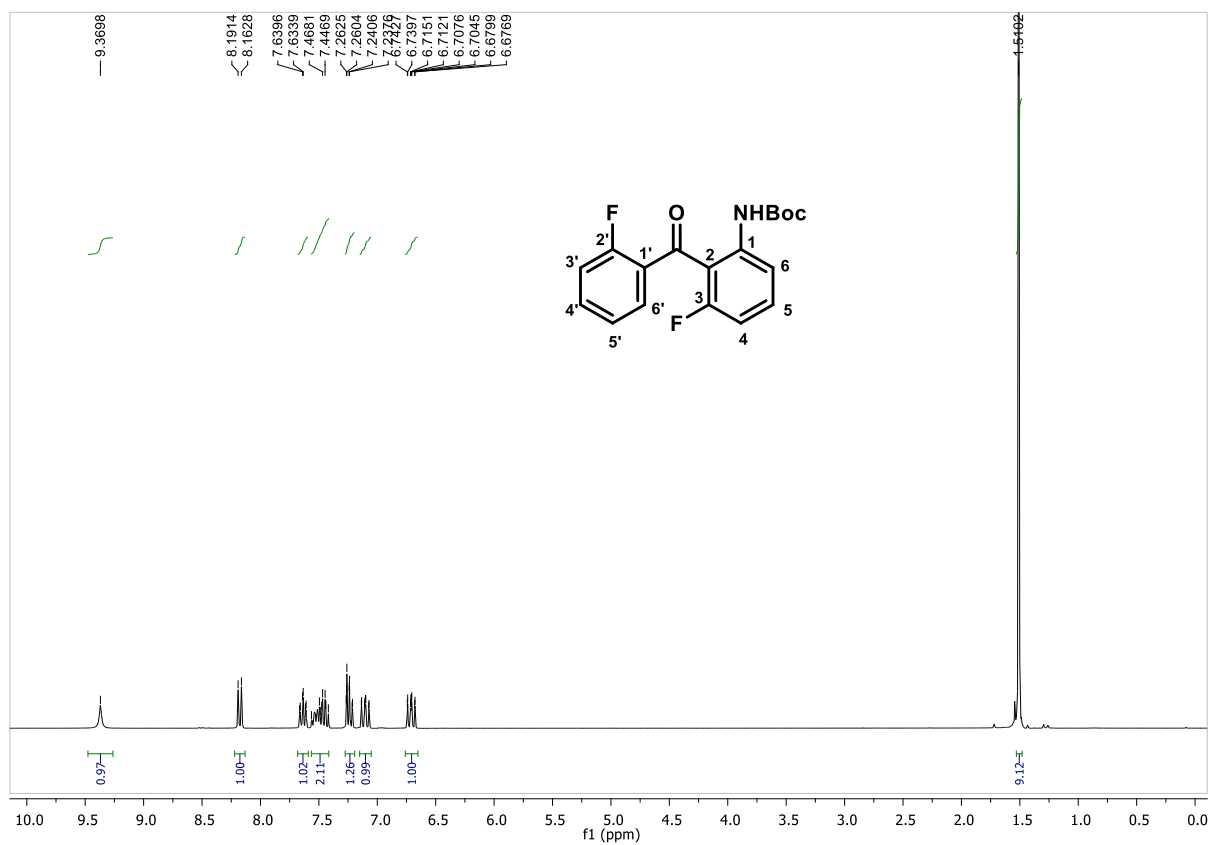

$^{13}\text{C}$  ( $\text{CDCl}_3$ , 300 K, 75 MHz)

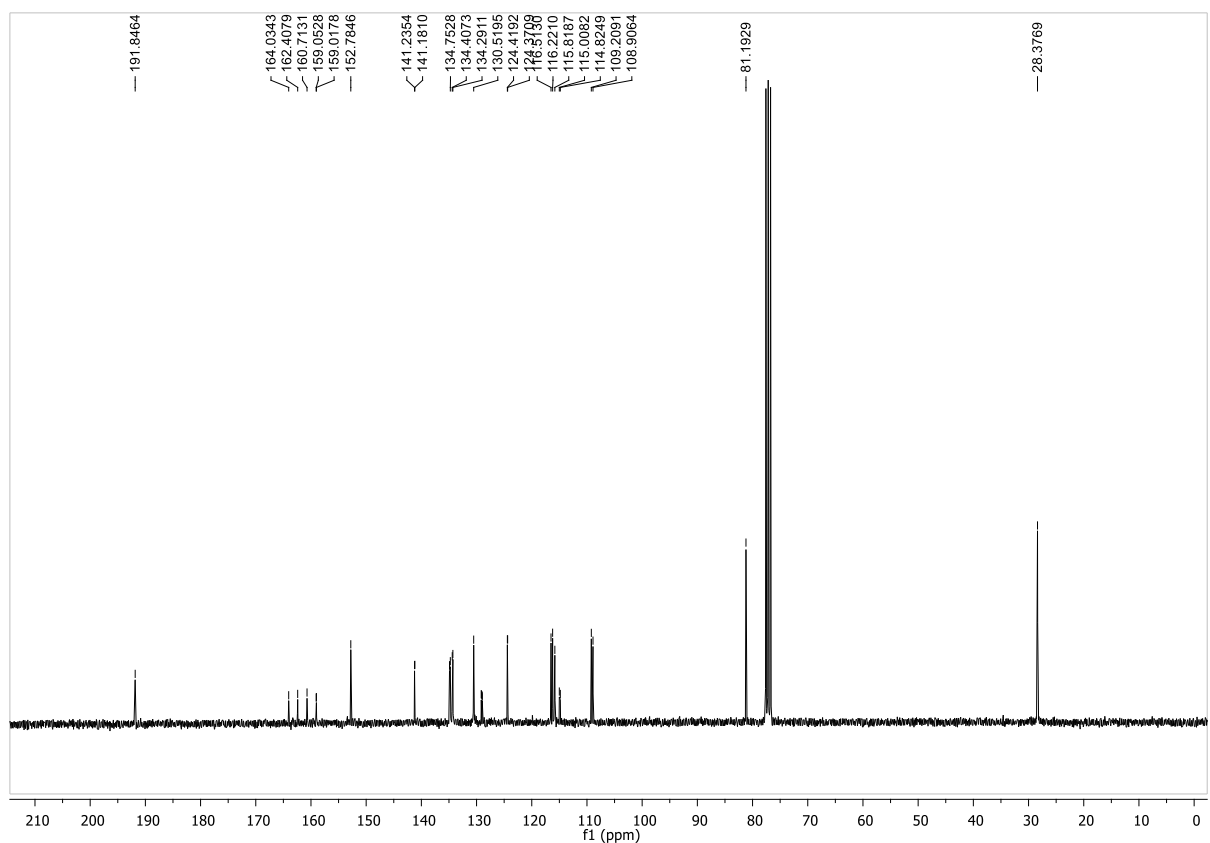



$^{19}\text{F}$  ( $\text{CDCl}_3$ , 300 K, 282 MHz)

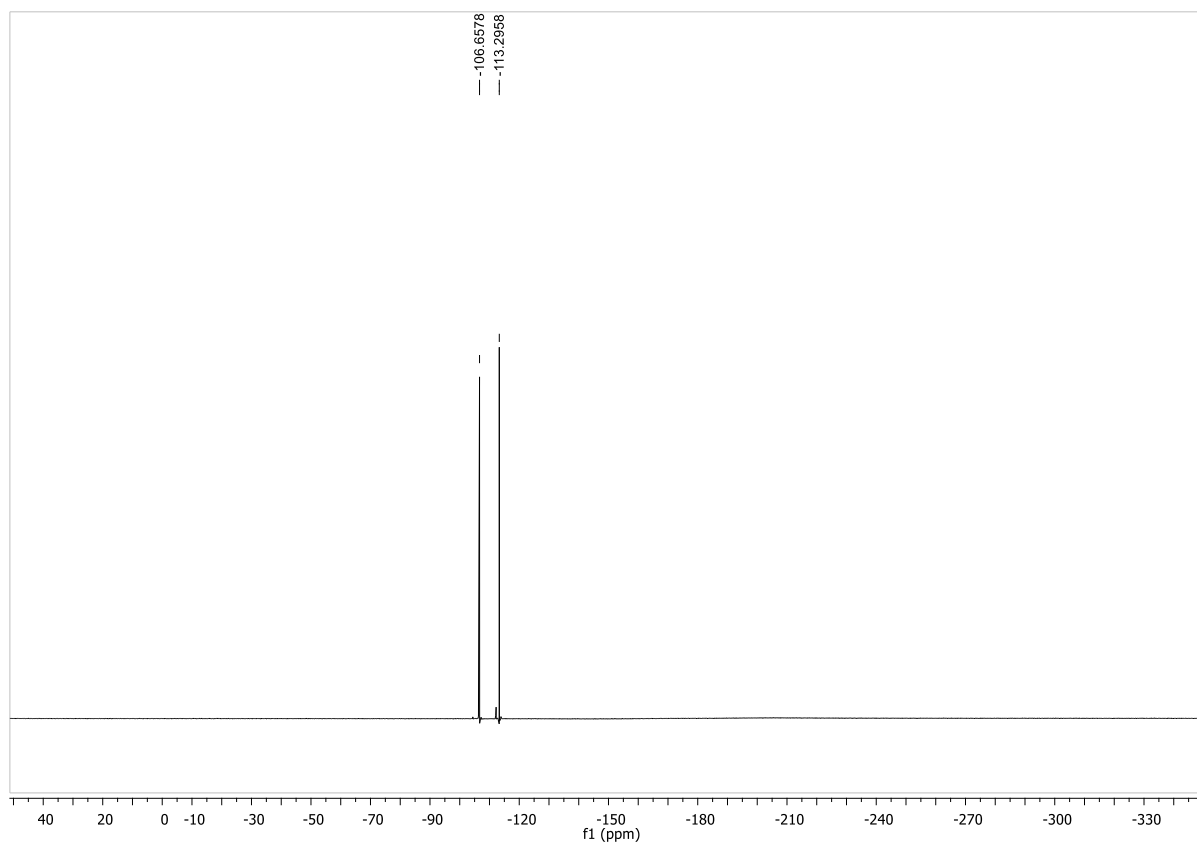

# 1-(*tert*-Butoxycarbonylamino)thioxanthone (**8**; crude)

$^1\text{H}$  (CDCl<sub>3</sub>, 300 K, 300 MHz)

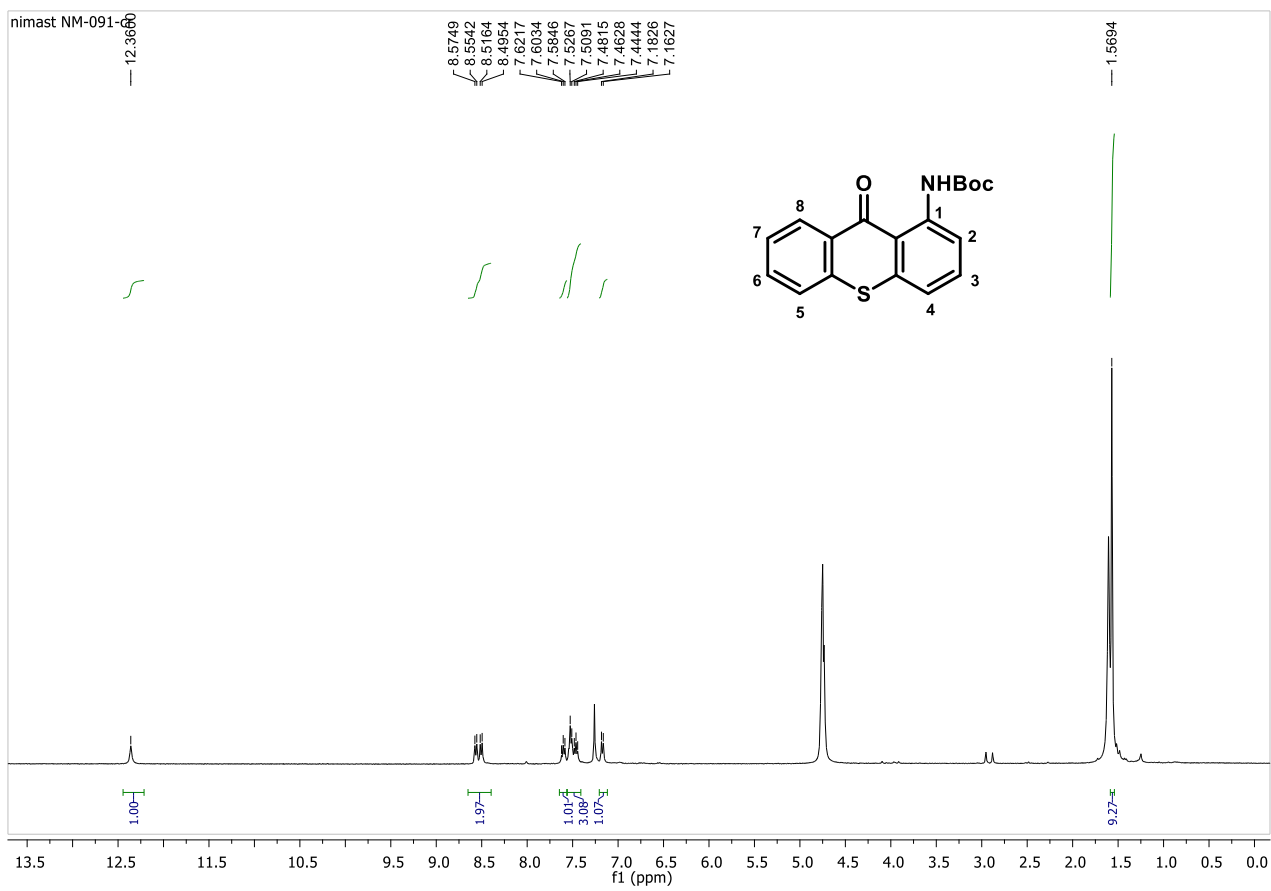

# Vinyl 2-chloro-6-fluorobenzoate (9)

$^1\text{H}$  (CDCl<sub>3</sub>, 300 K, 500 MHz)

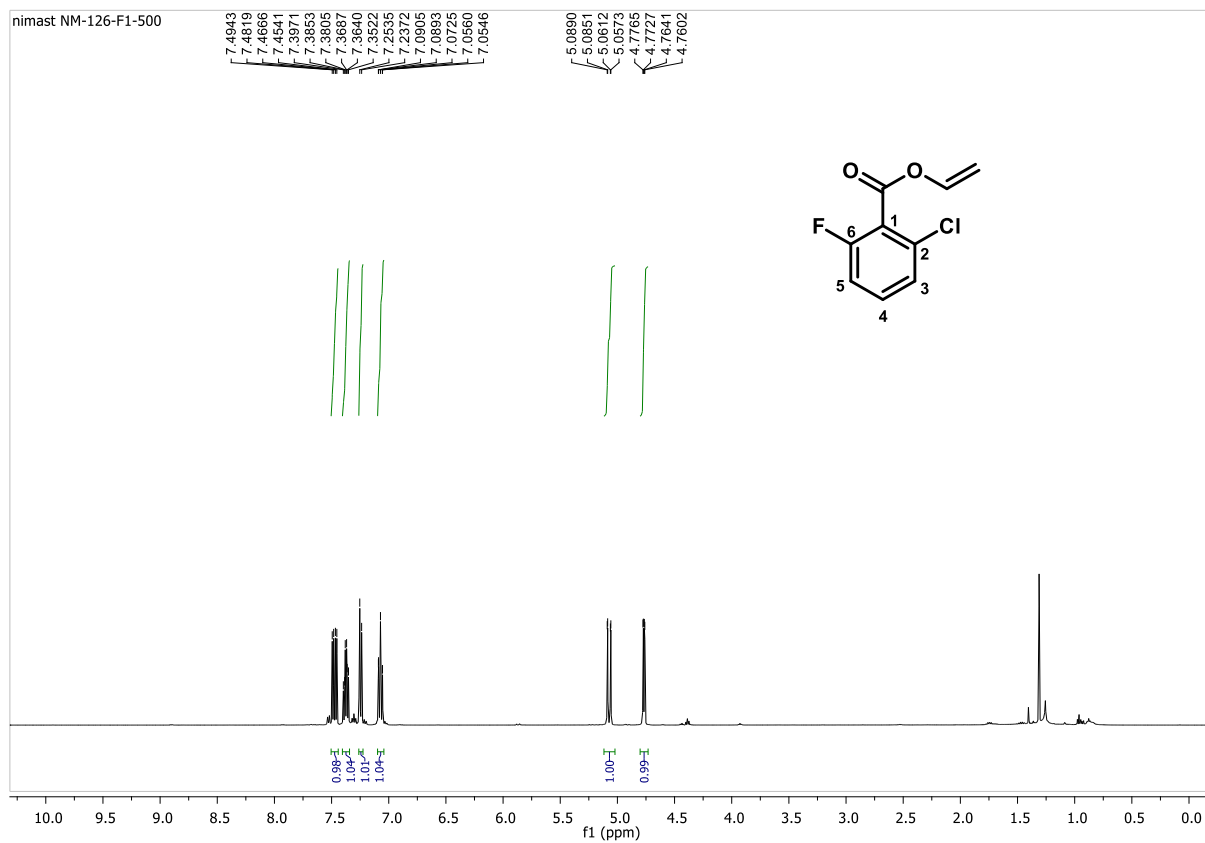

JMOD (CDCl<sub>3</sub>, 300 K, 126 MHz)

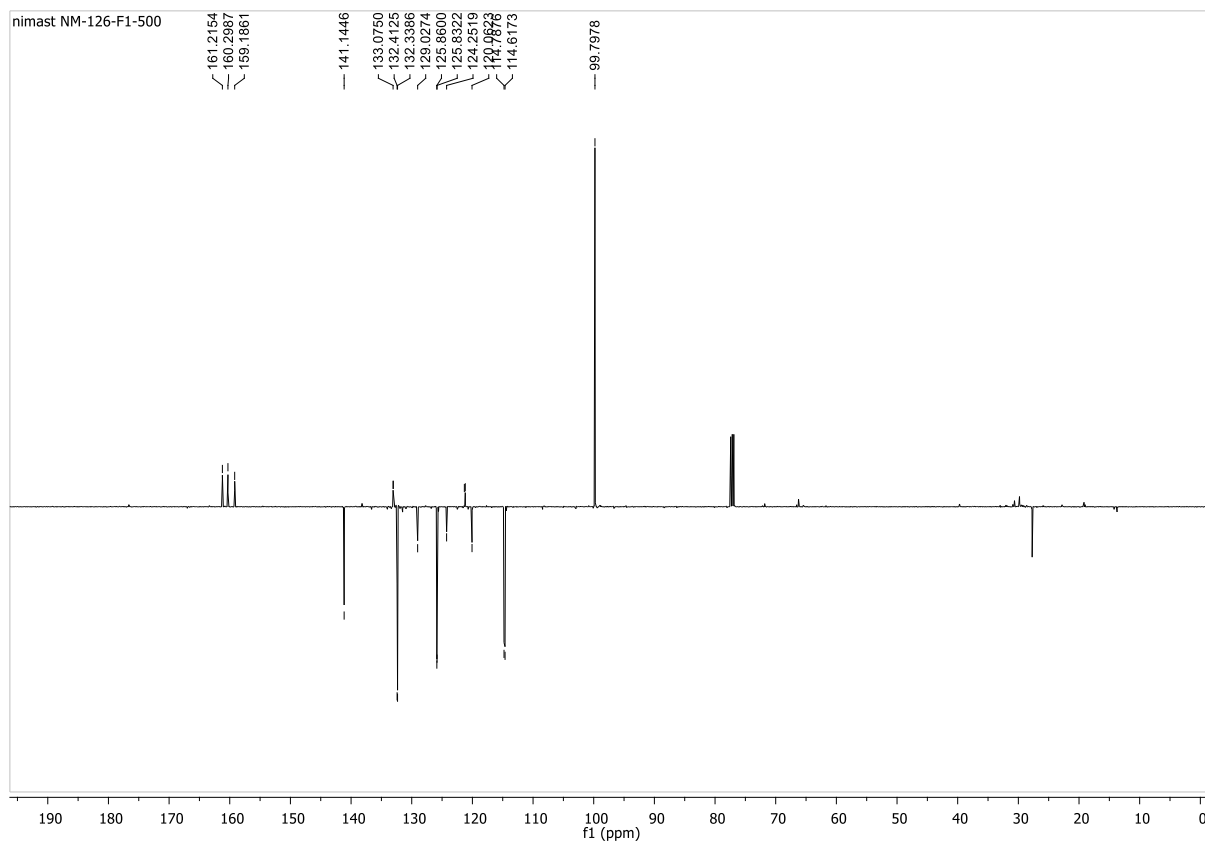

$^{19}\text{F}$  ( $\text{CDCl}_3$ , 300 K, 471 MHz)

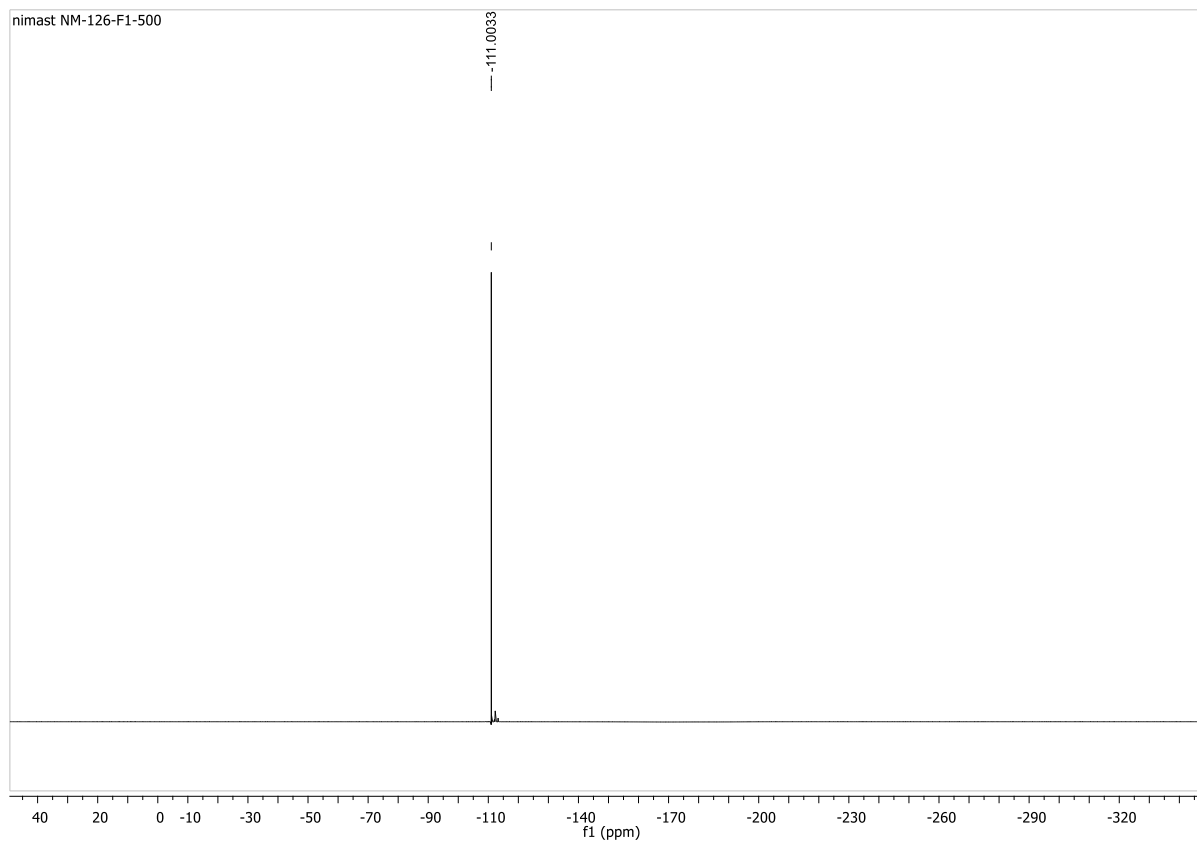

***tert*-Butyl *N*-(2-fluorobenzoyl)-*N*-(3-fluorophenyl)carbamate (10)**

$^1\text{H}$  (CDCl<sub>3</sub>, 300 K, 500 MHz)

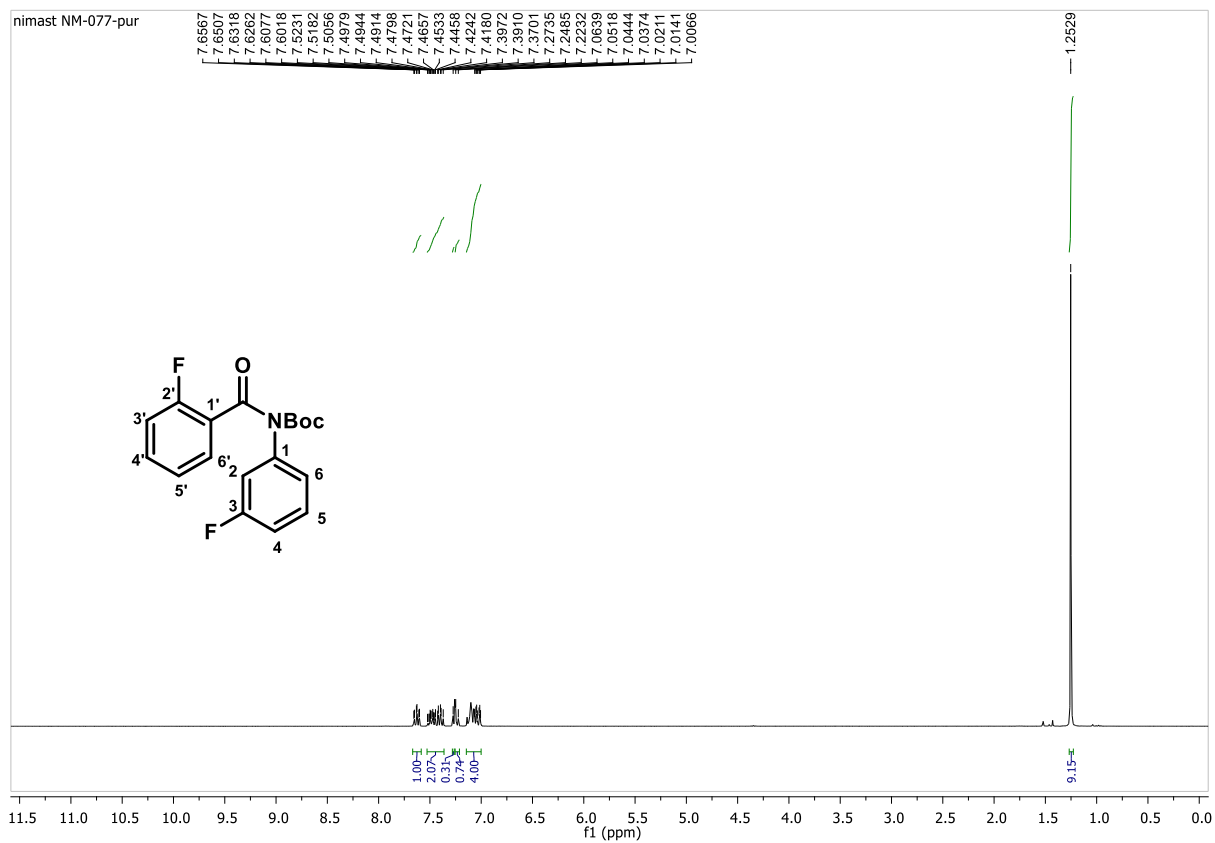

$^{13}\text{C}$  (CDCl<sub>3</sub>, 300 K, 126 MHz)

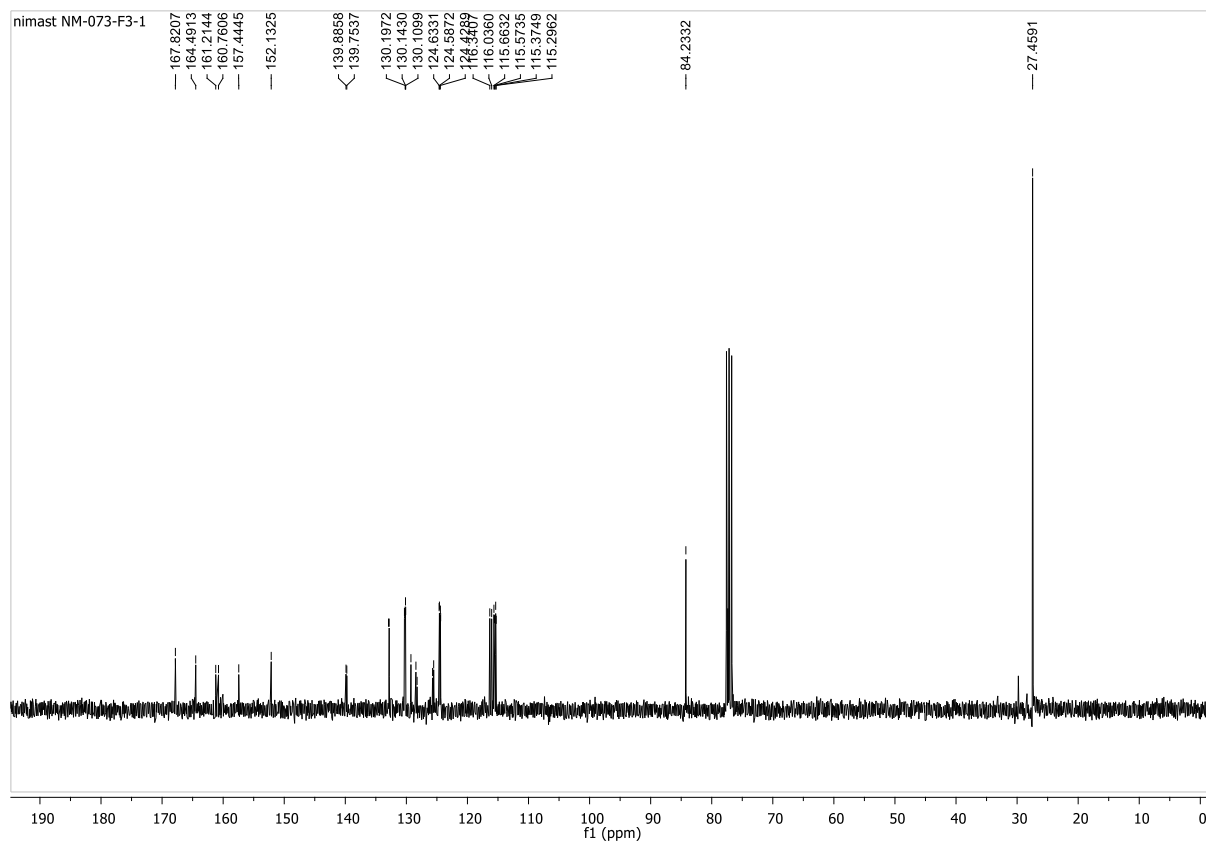

$^{19}\text{F}$  ( $\text{CDCl}_3$ , 300 K, 282 MHz)

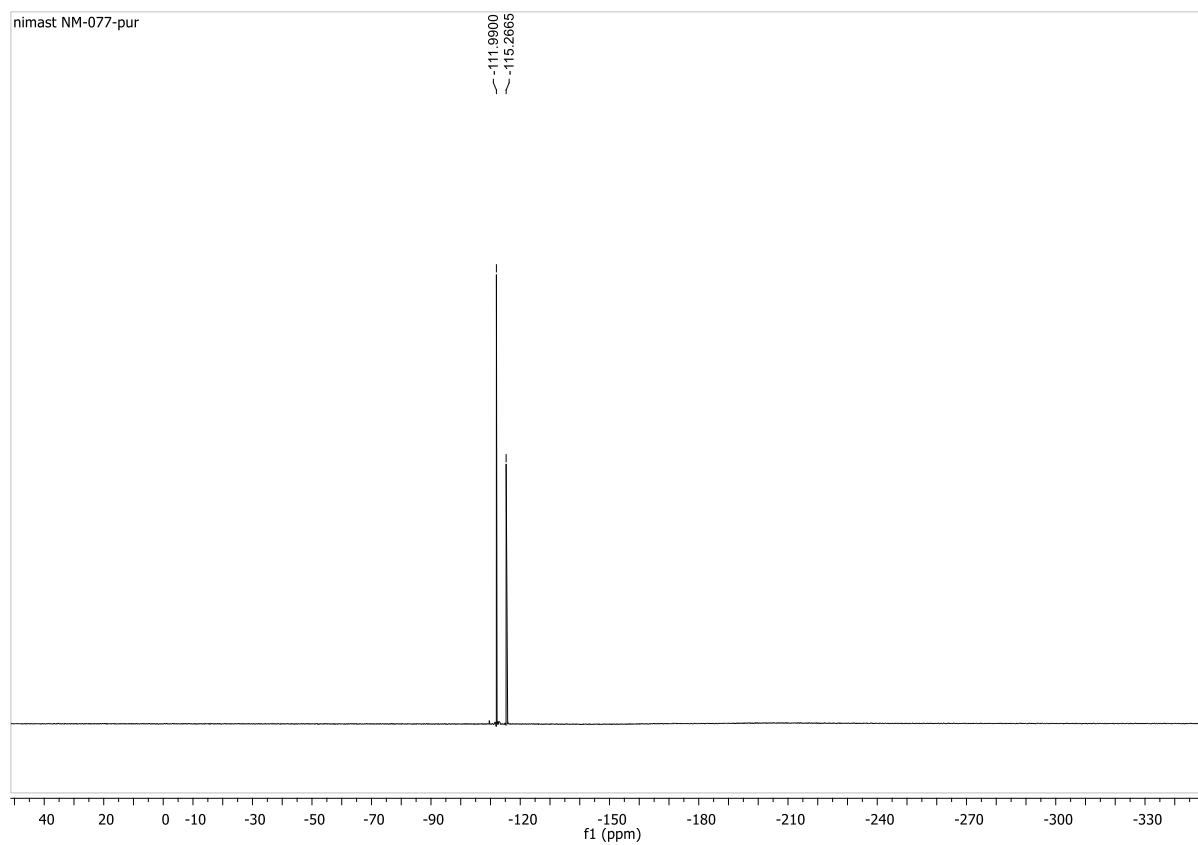

DEPT135 ( $\text{CDCl}_3$ , 300 K, 126 MHz)

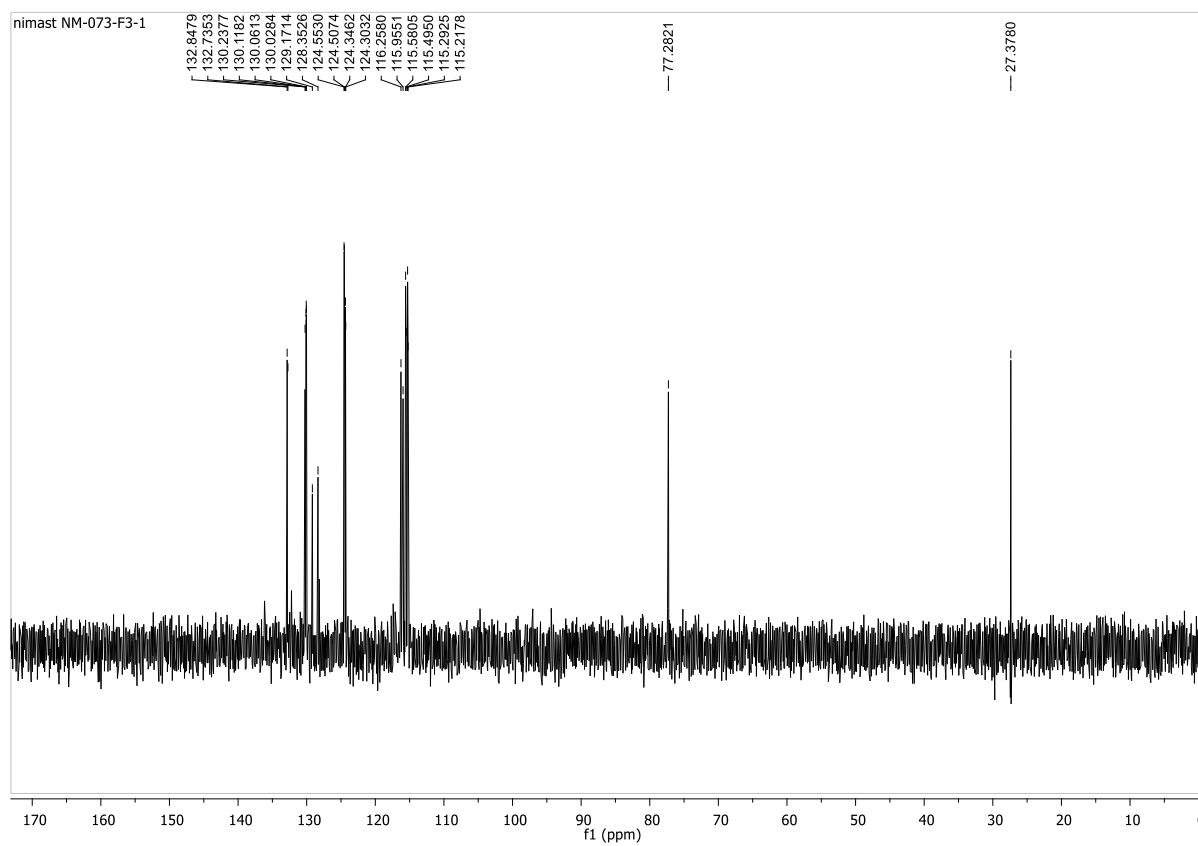

# 5-Chloro-2-(methylthio)benzaldehyde (11)

$^1\text{H}$  ( $\text{CDCl}_3$ , 300 K, 500 MHz)

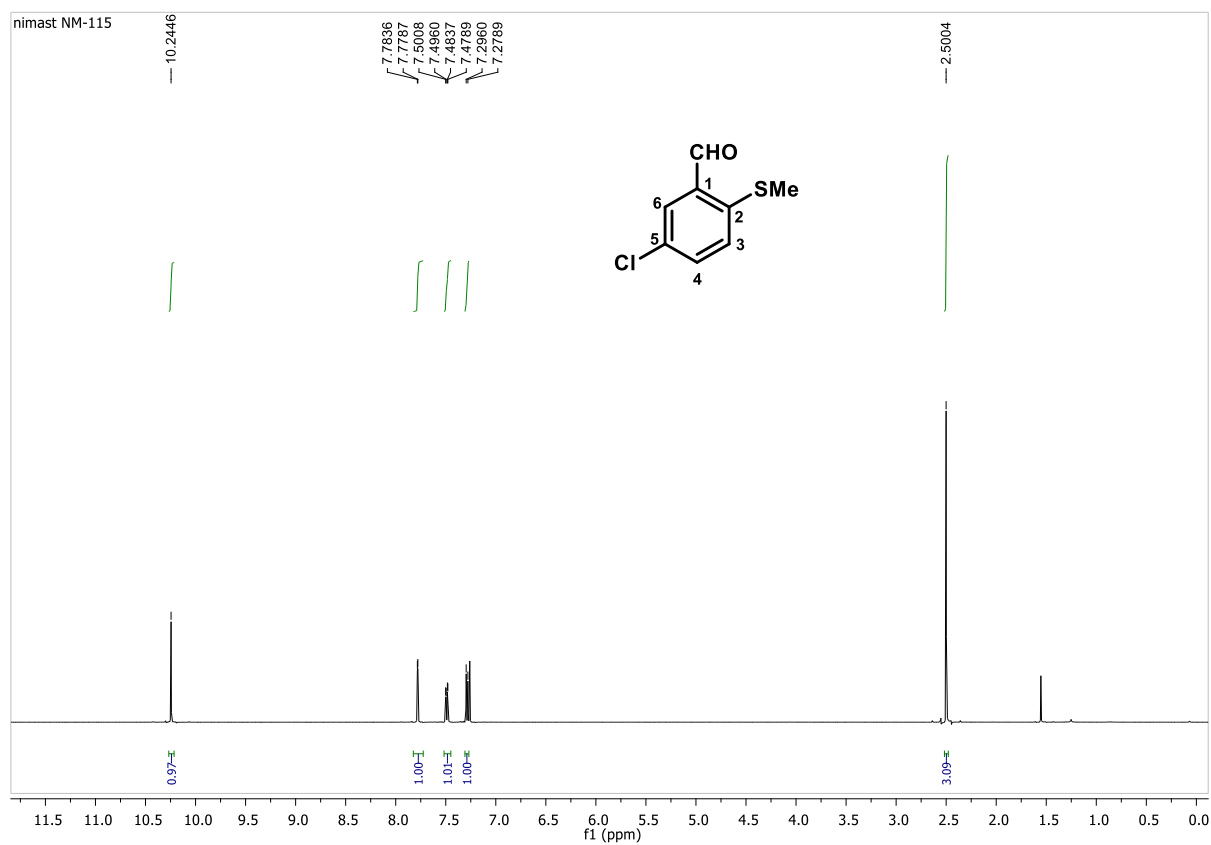

$^{13}\text{C}$  ( $\text{CDCl}_3$ , 300 K, 126 MHz)

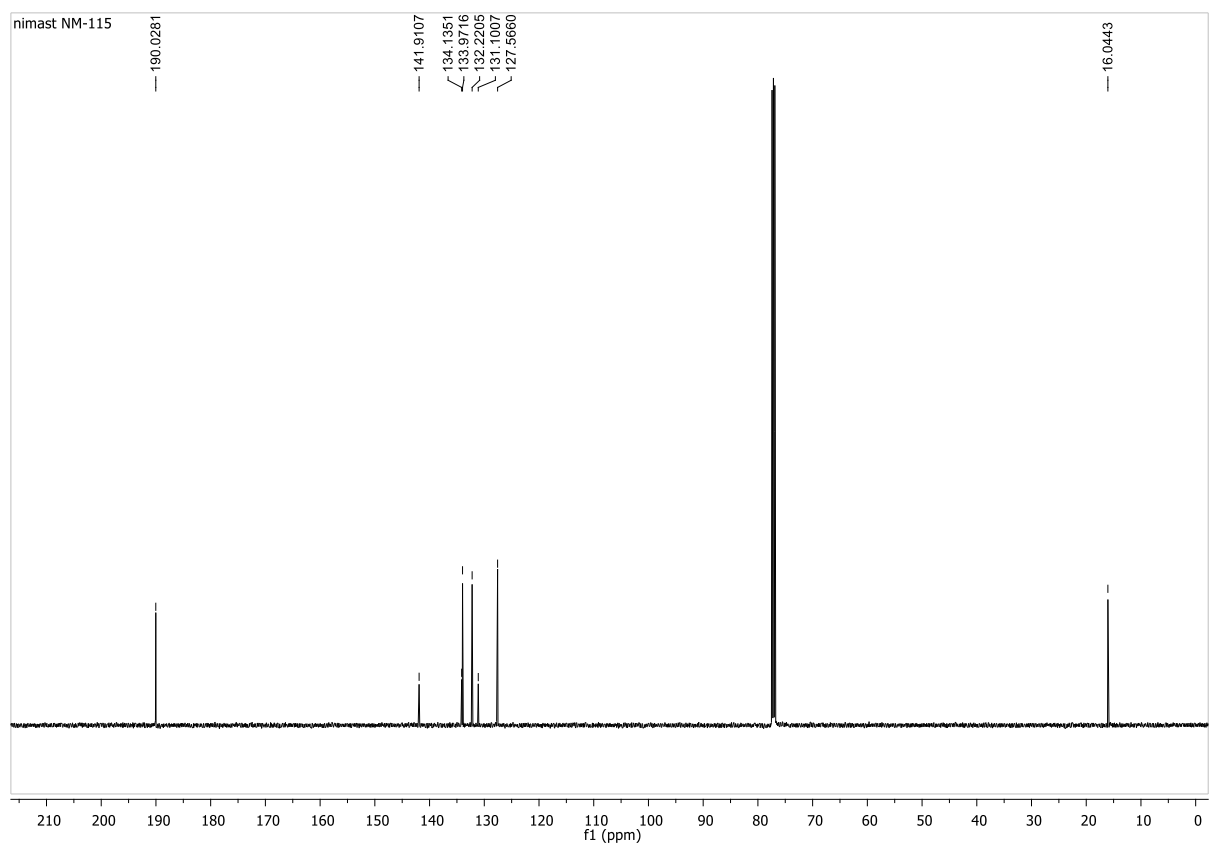

## 2-(*tert*-Butoxycarbonylamino)thioxanthone (12-Boc)

$^1\text{H}$  ( $\text{CDCl}_3$ , 300 K, 300 MHz)

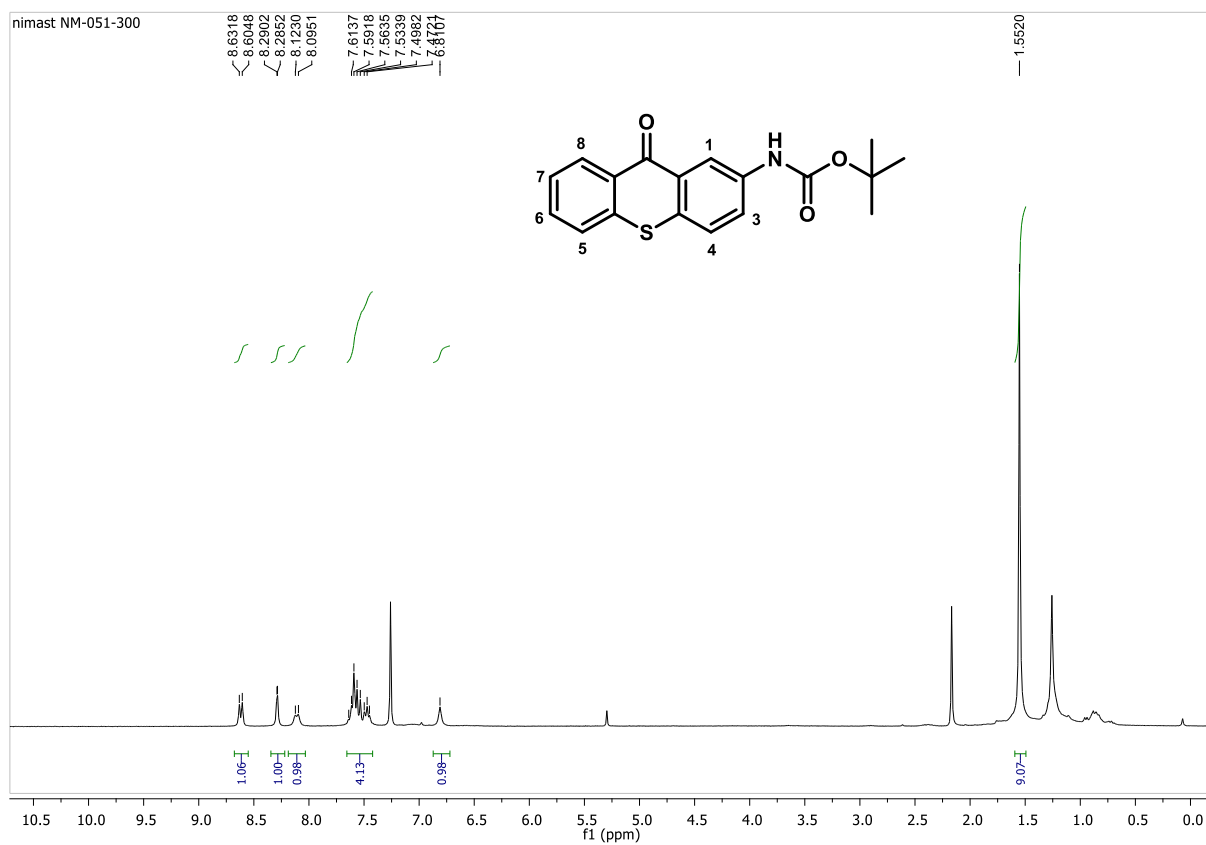

$^1\text{H}$  ( $(\text{CD}_3)_2\text{SO}$ , 300 K, 500 MHz) – Presence of  $\text{CHCl}_3$

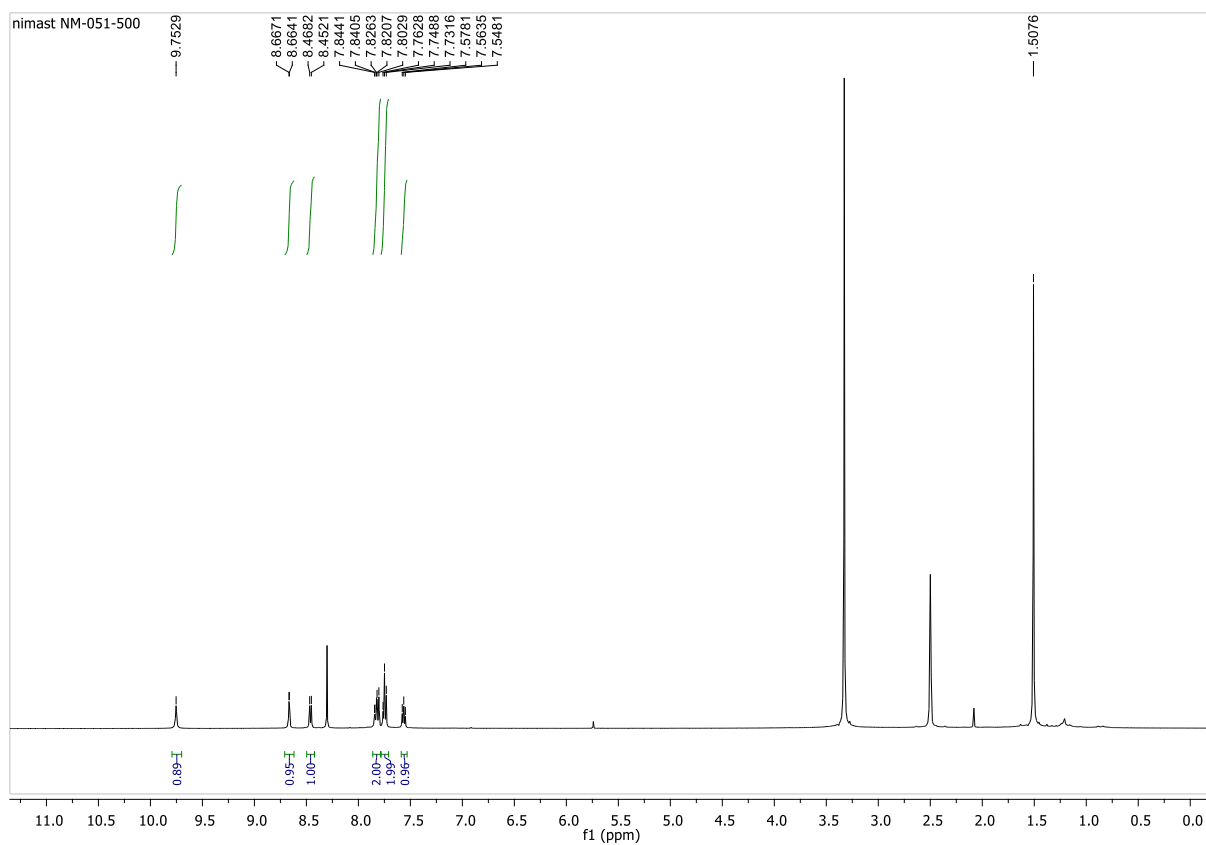



$^{13}\text{C}$  ( $\text{CDCl}_3$ , 300 K, 75 MHz)

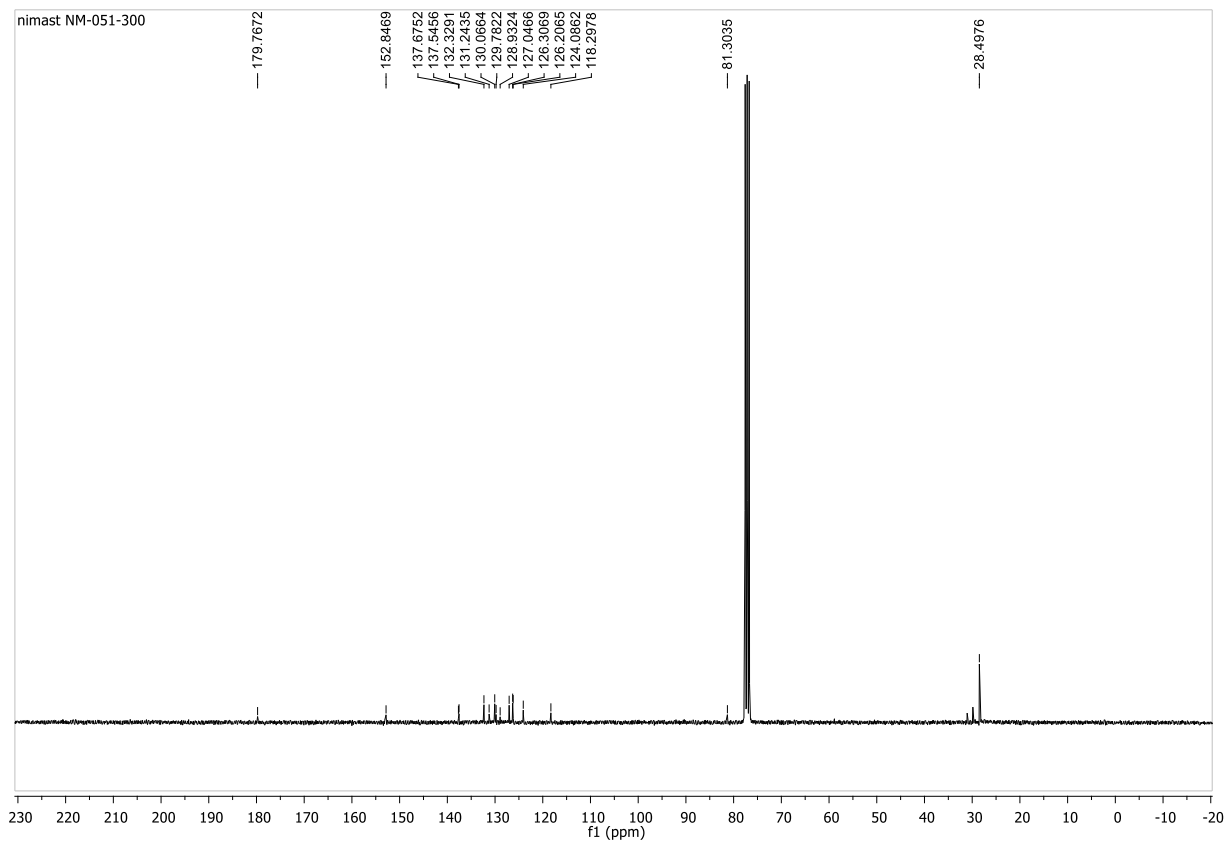

$^{13}\text{C}$  ( $(\text{CD}_3)_2\text{SO}$ , 300 K, 126 MHz)

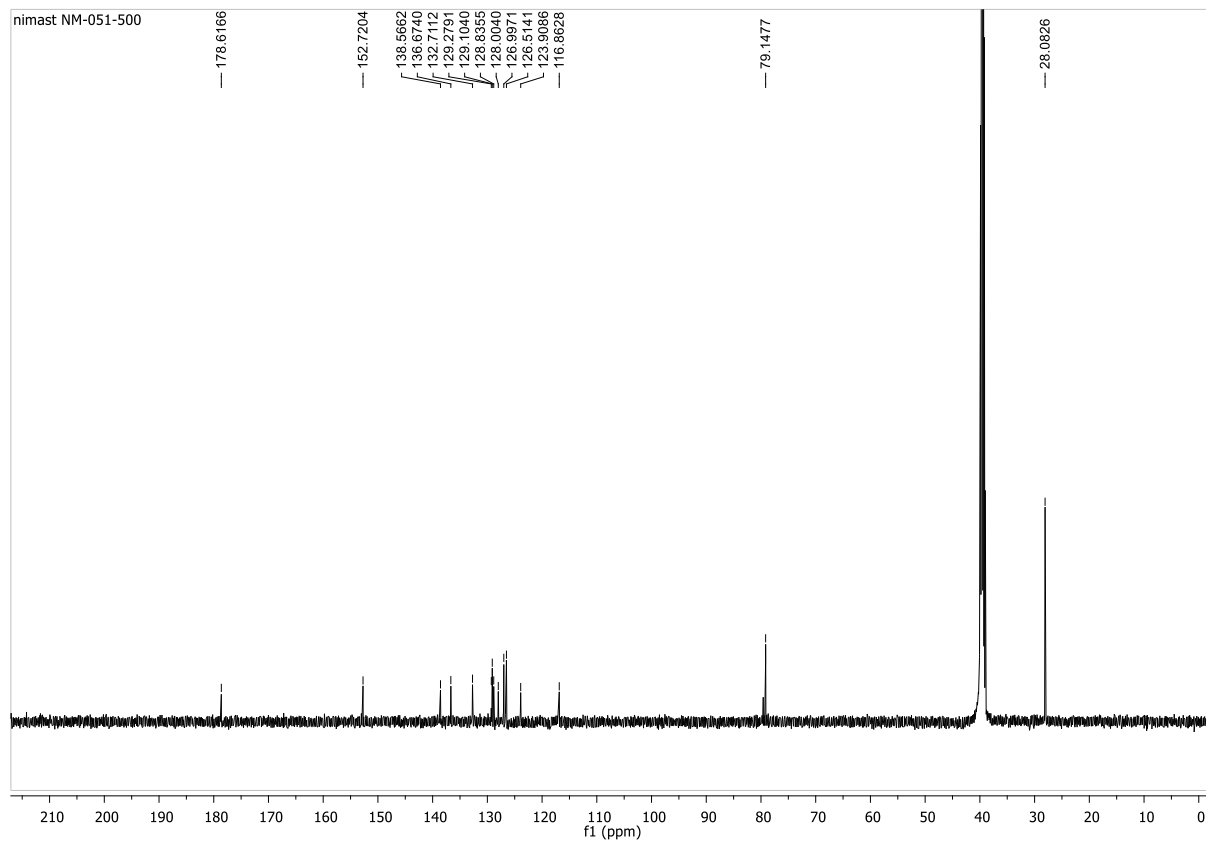

JMOD ((CD<sub>3</sub>)<sub>2</sub>SO, 300 K, 126 MHz)

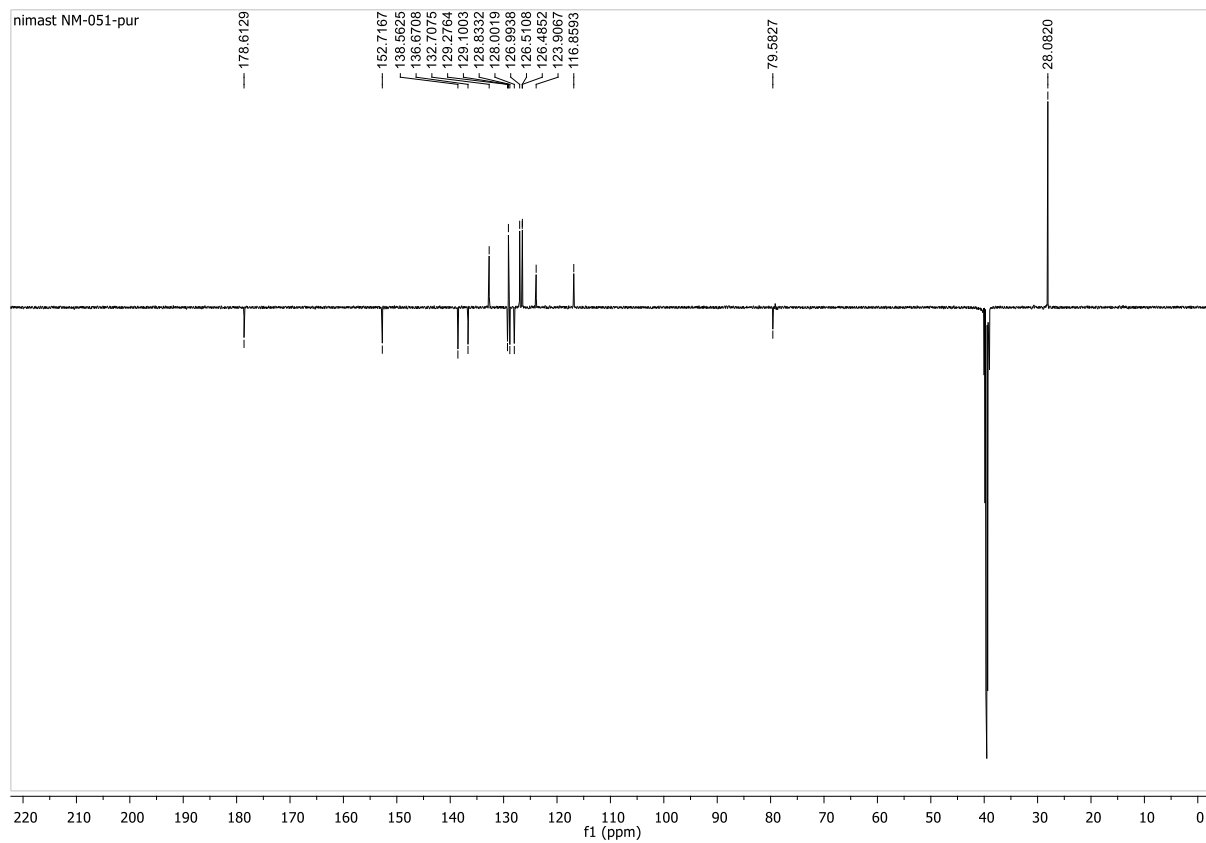

# 10-Methylbenzothiopyrano[4,3,2-de]indolo[2,3-b]quinoline (13)

$^1\text{H}$  (CDCl<sub>3</sub>, 300 K, 300 MHz)

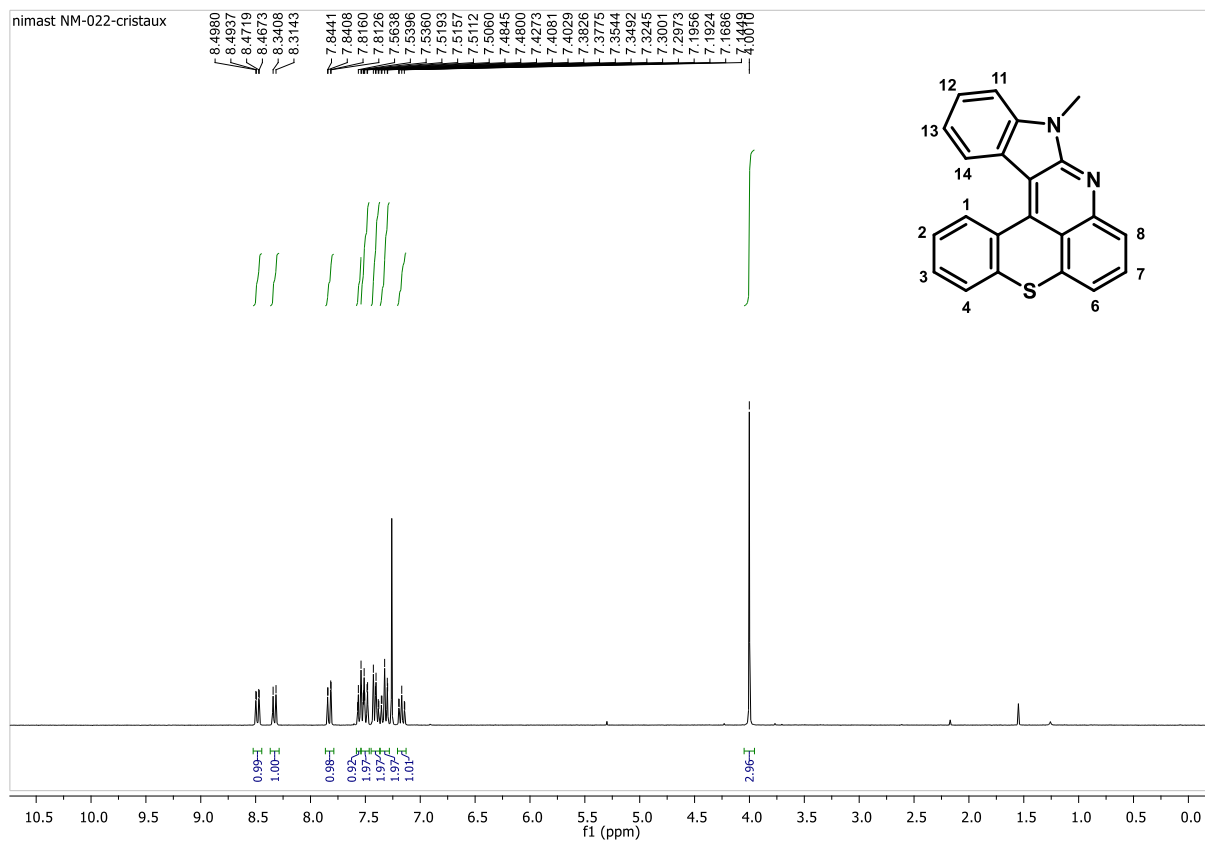

$^{13}\text{C}$  (CDCl<sub>3</sub>, 300 K, 75 MHz)

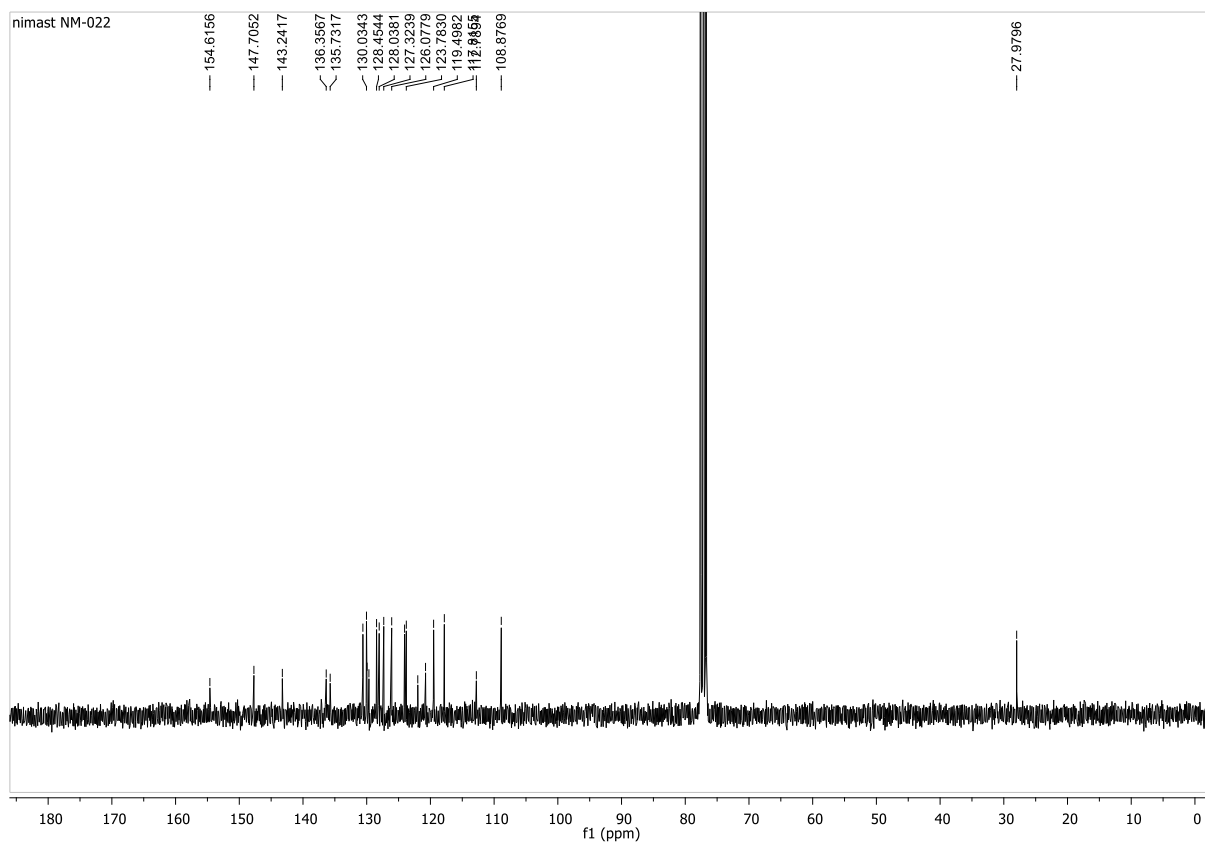

DEPT135 (CDCl<sub>3</sub>, 300 K, 75 MHz)

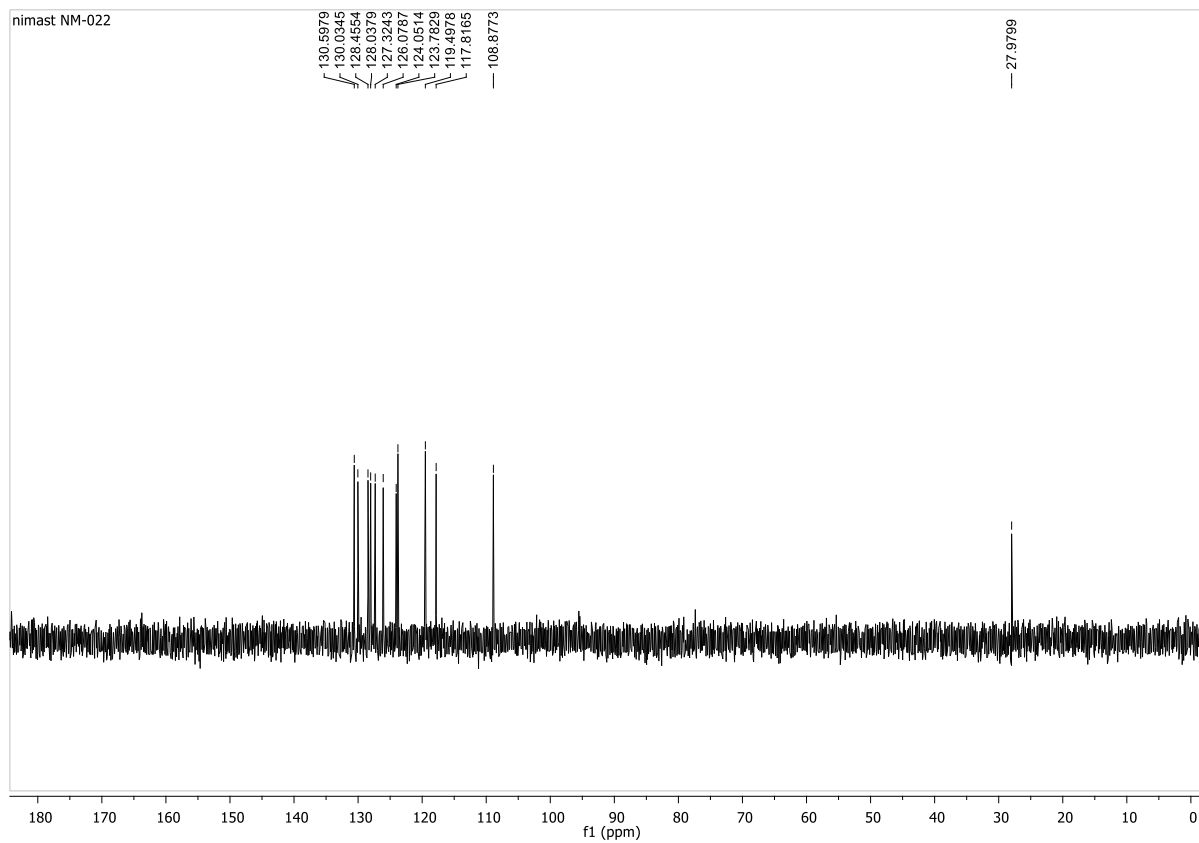

## 2-Amino-6,2'-difluorobenzophenone (14)

$^1\text{H}$  ( $\text{CDCl}_3$ , 300 K, 400 MHz)

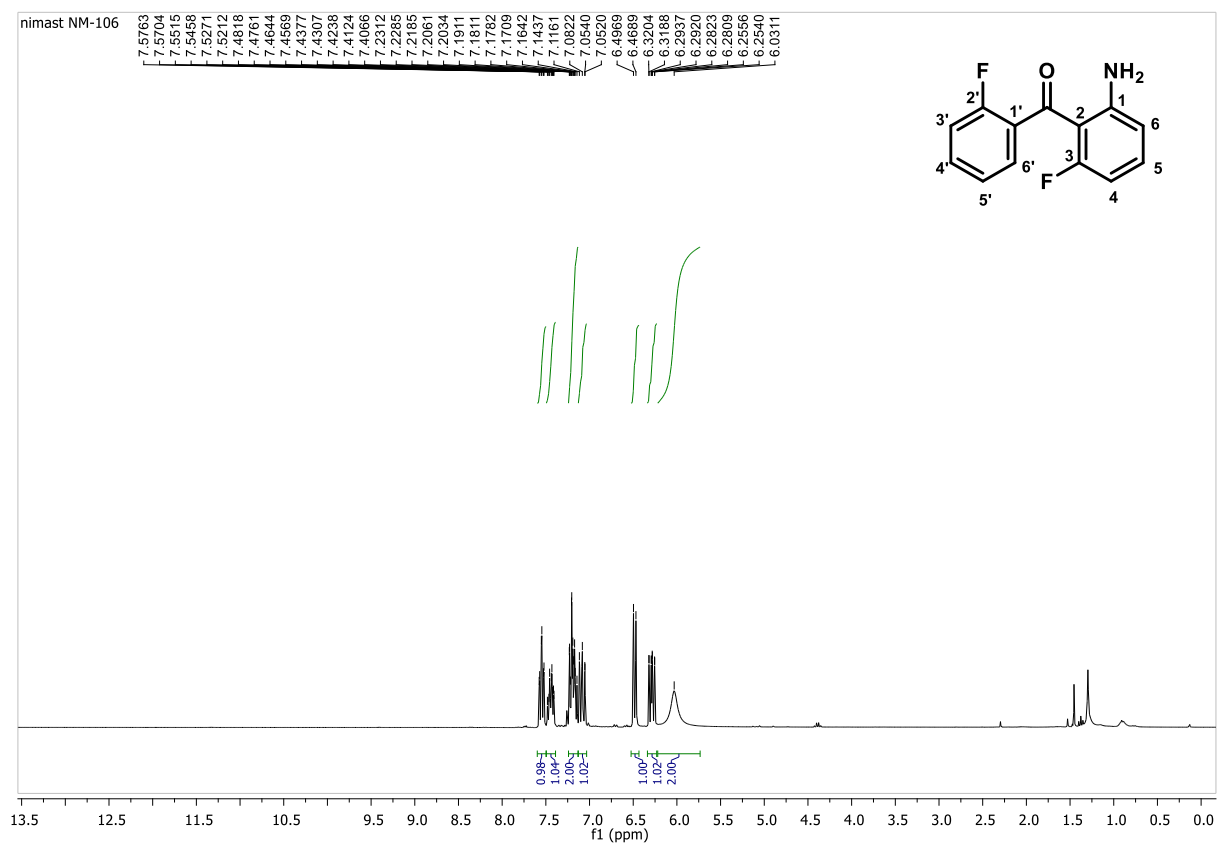

$^{19}\text{F}$  ( $\text{CDCl}_3$ , 300 K, 282 MHz)

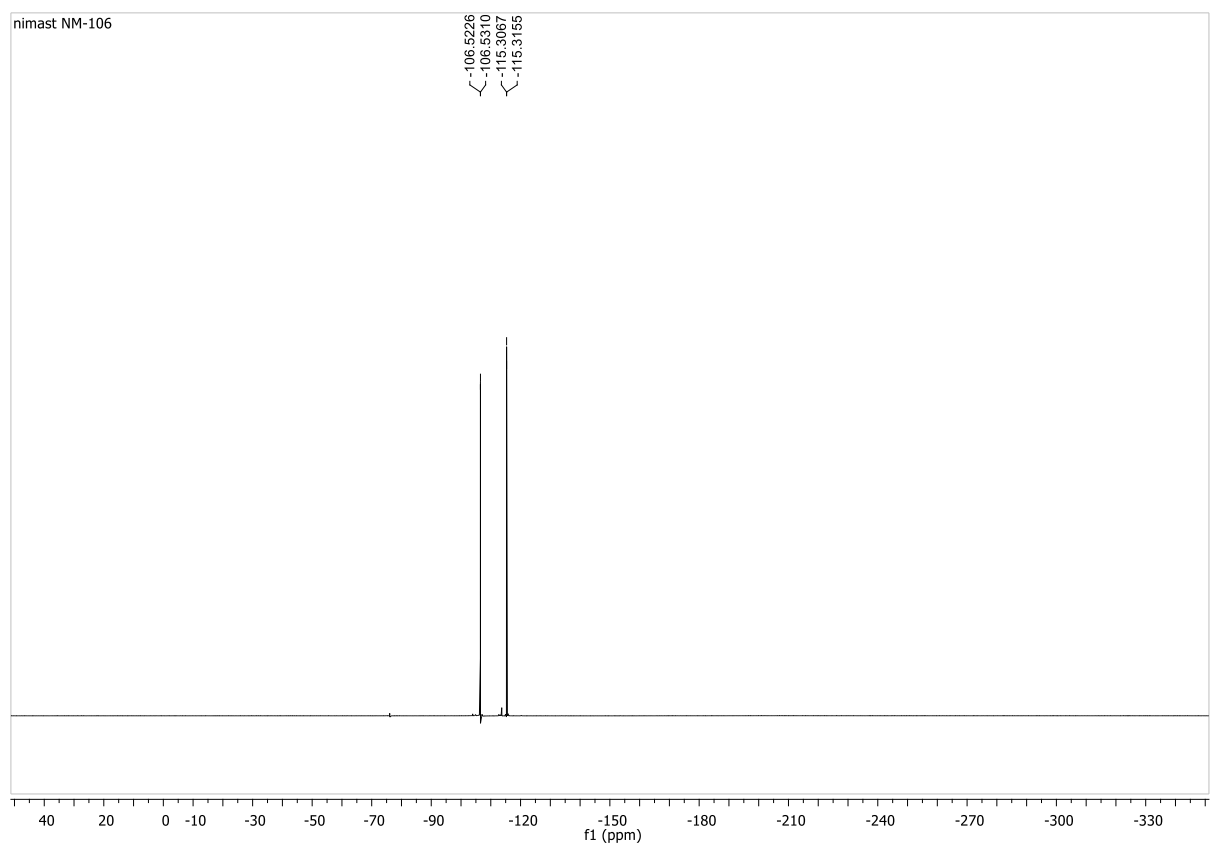

# 10-Fluoro-11-(2-fluorophenyl)benzothieno[2,3-b]quinoline (15a)

$^1\text{H}$  (CDCl<sub>3</sub>, 300 K, 400 MHz)

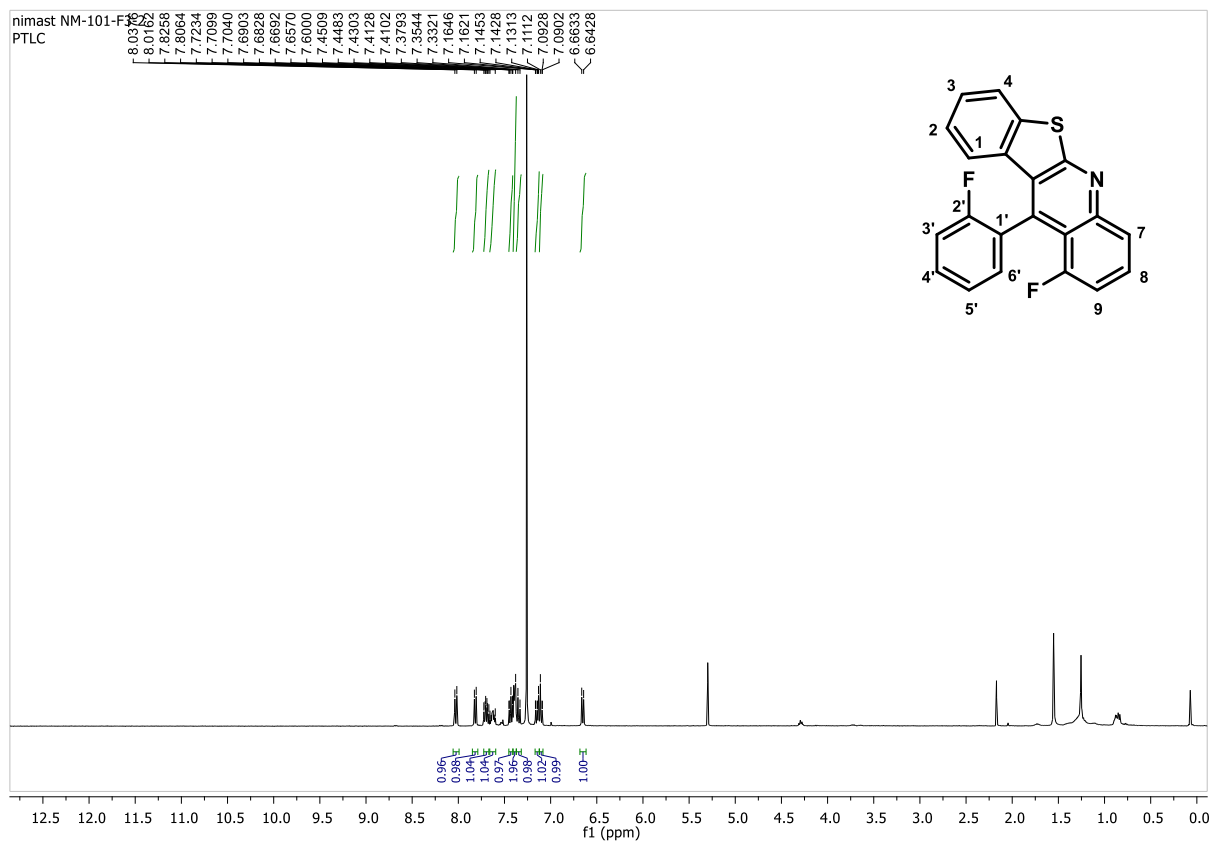

$^{19}\text{F}$  (CDCl<sub>3</sub>, 300 K, 376 MHz)

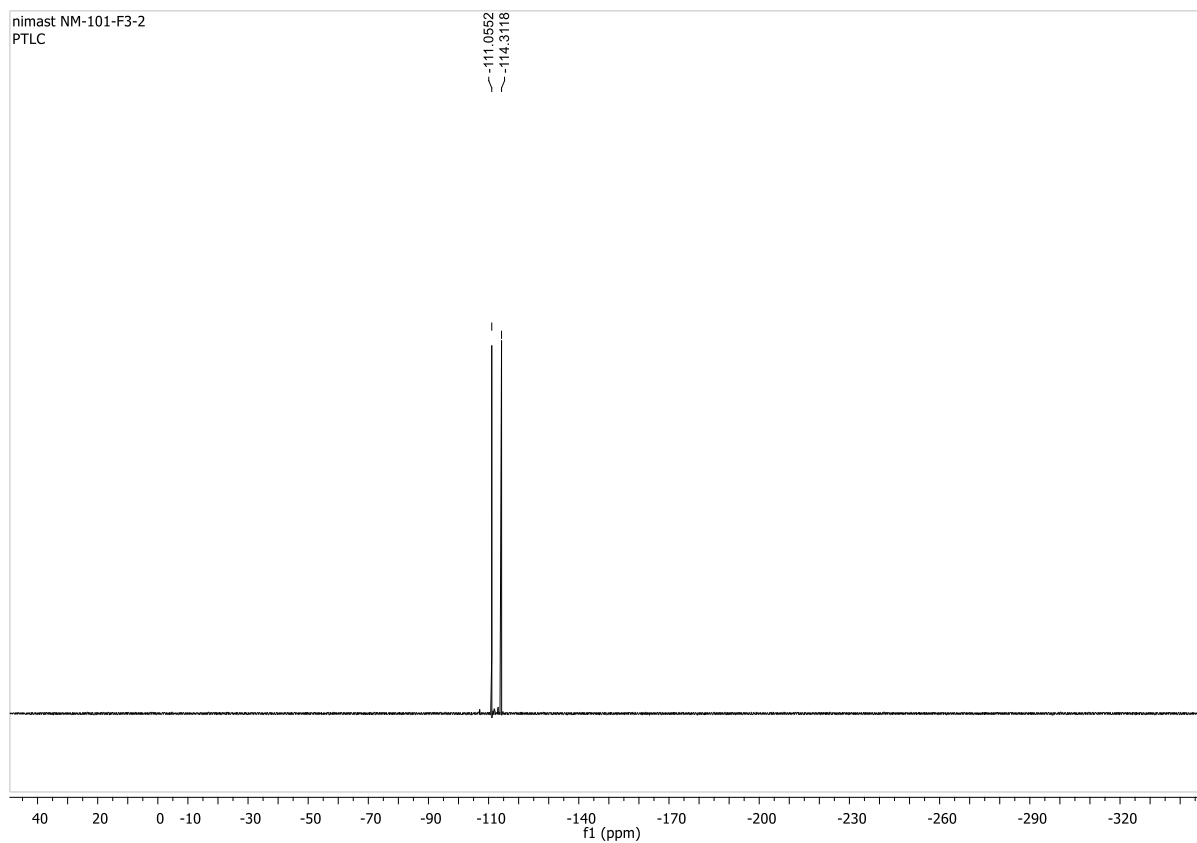

# 10-Fluoro-11-(2-fluorophenyl)-5-(methoxymethyl)indolo[2,3-b]quinoline (15b)

$^1\text{H}$  (CDCl<sub>3</sub>, 300 K, 500 MHz)

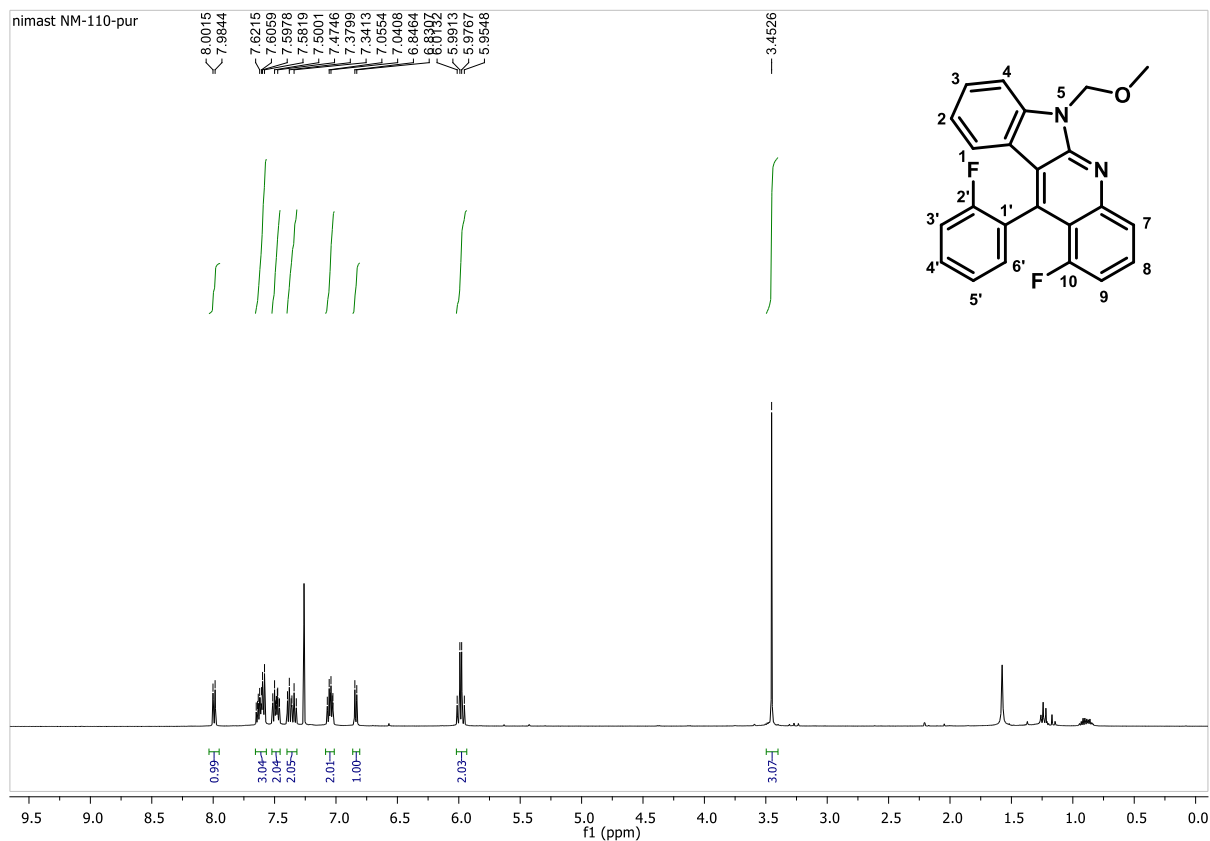

JMOD (CDCl<sub>3</sub>, 300 K, 126 MHz)

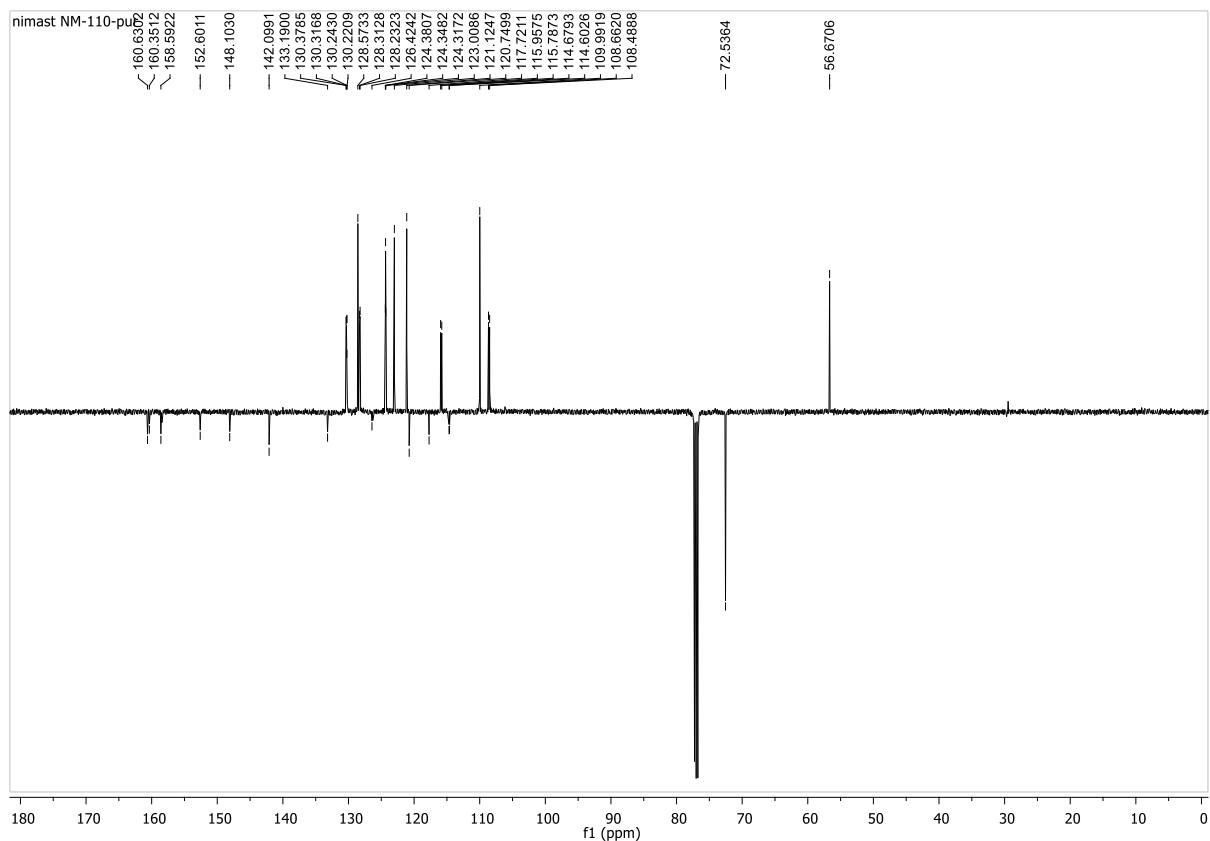

$^{19}\text{F}$  ( $\text{CDCl}_3$ , 300 K, 471 MHz)

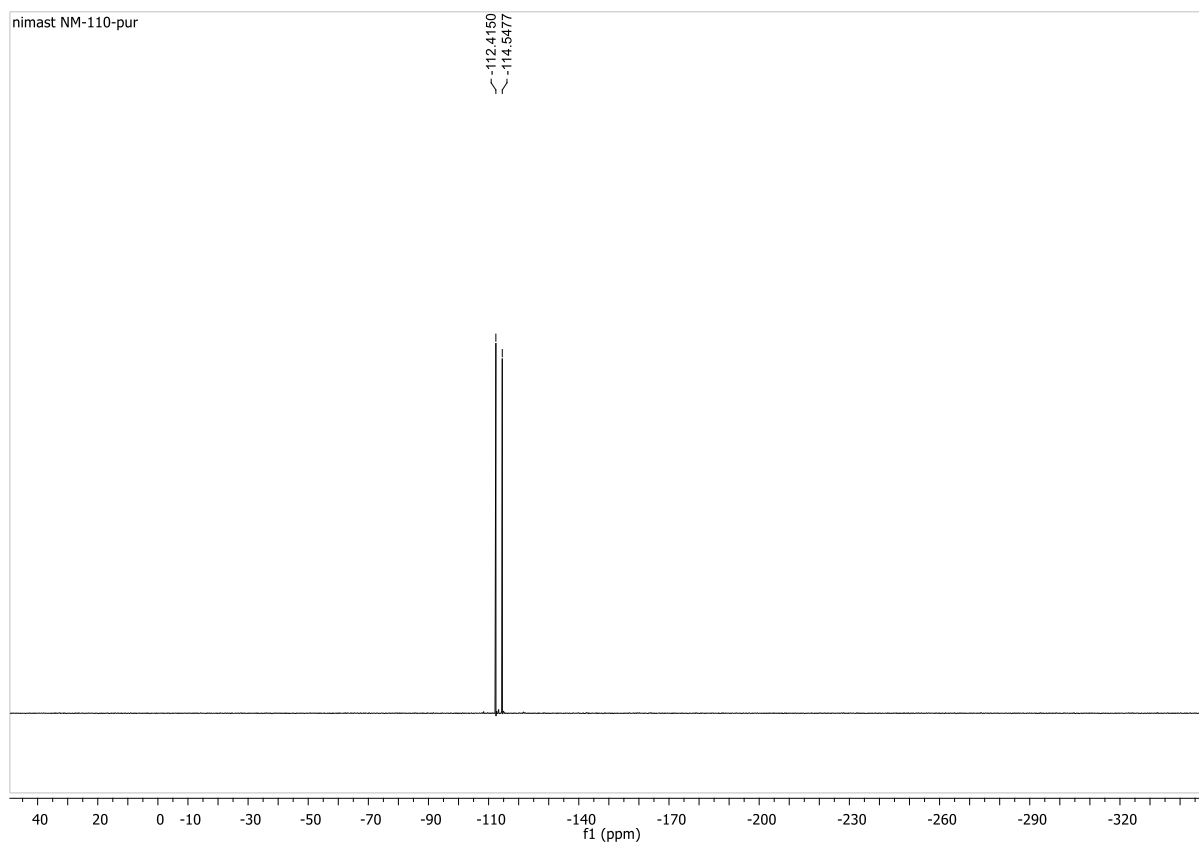



### 3-(1-(2-Bromophenyl)hydroxymethyl)-2-chloropyridine (16)

$^1\text{H}$  ( $\text{CDCl}_3$ , 300 K, 500 MHz)

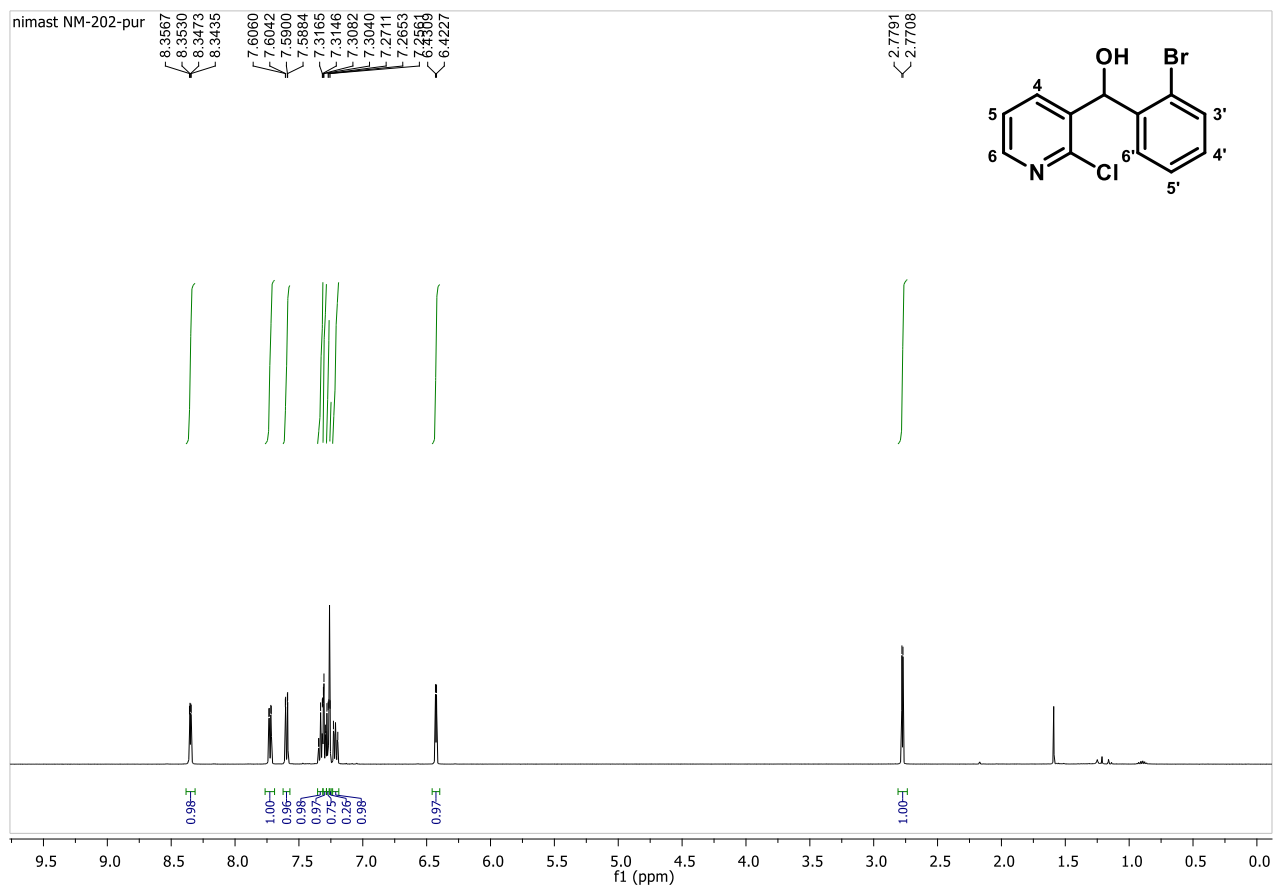

JMOD ( $\text{CDCl}_3$ , 300 K, 126 MHz)

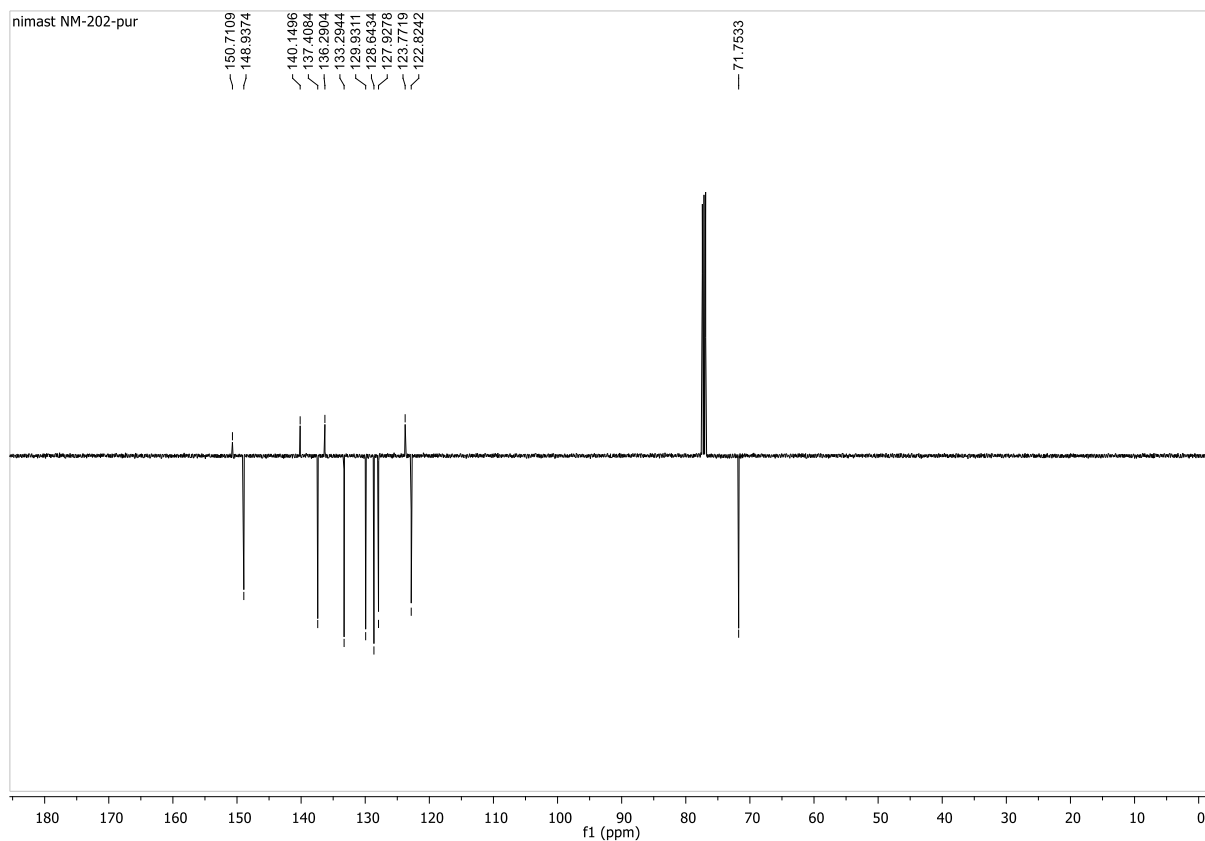

### 3-(2-Bromobenzoyl)-2-chloropyridine (17)

$^1\text{H}$  ( $\text{CDCl}_3$ , 300 K, 300 MHz)

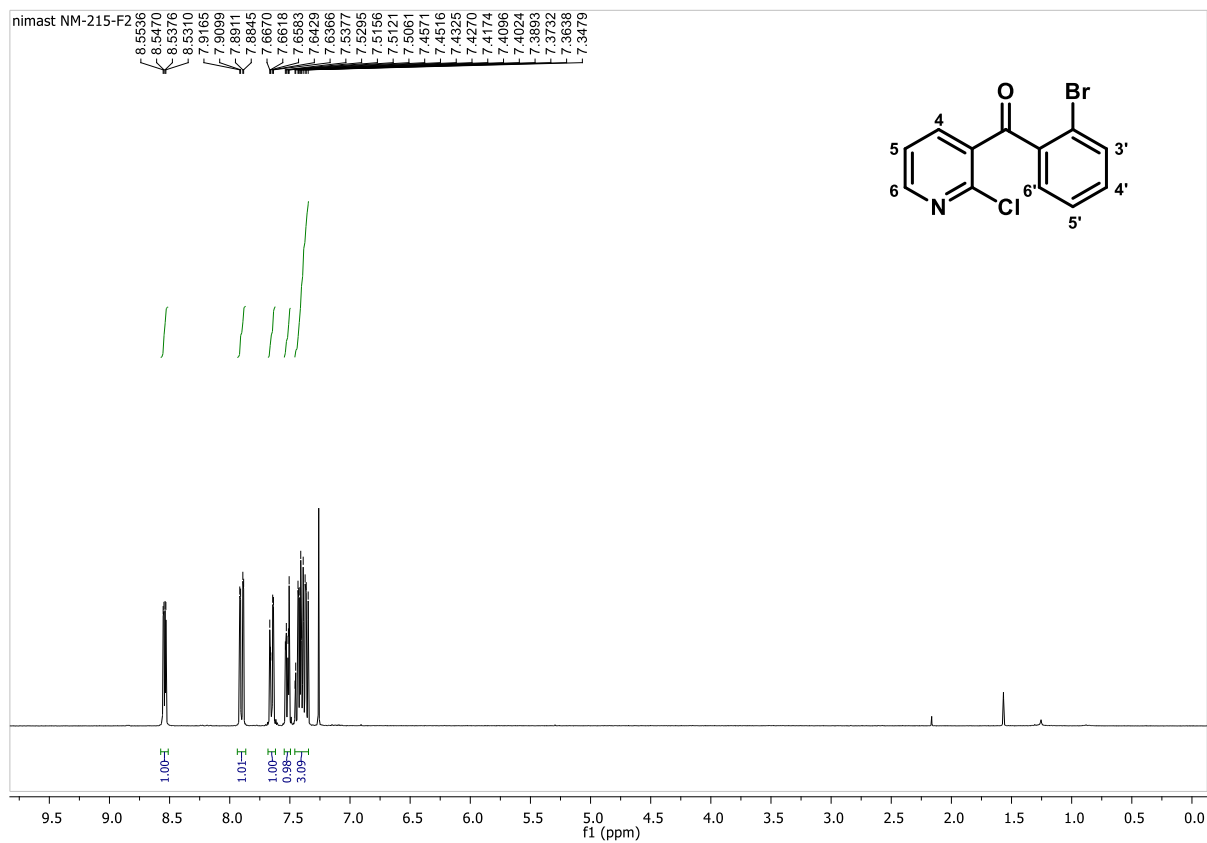

JMOD ( $\text{CDCl}_3$ , 300 K, 126 MHz)

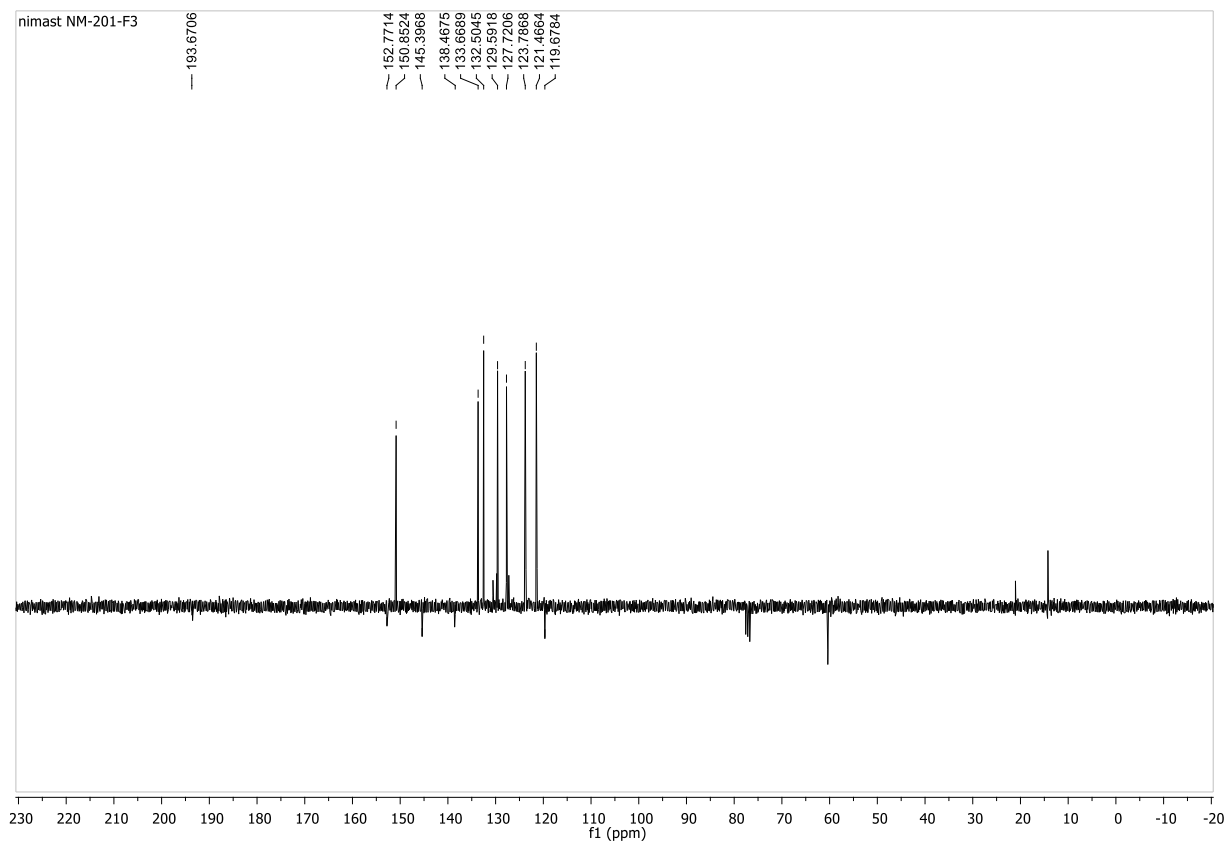

# 2-Chloro-4-(methylthio)pyridine

$^1\text{H}$  ( $\text{CDCl}_3$ , 300 K, 500 MHz)

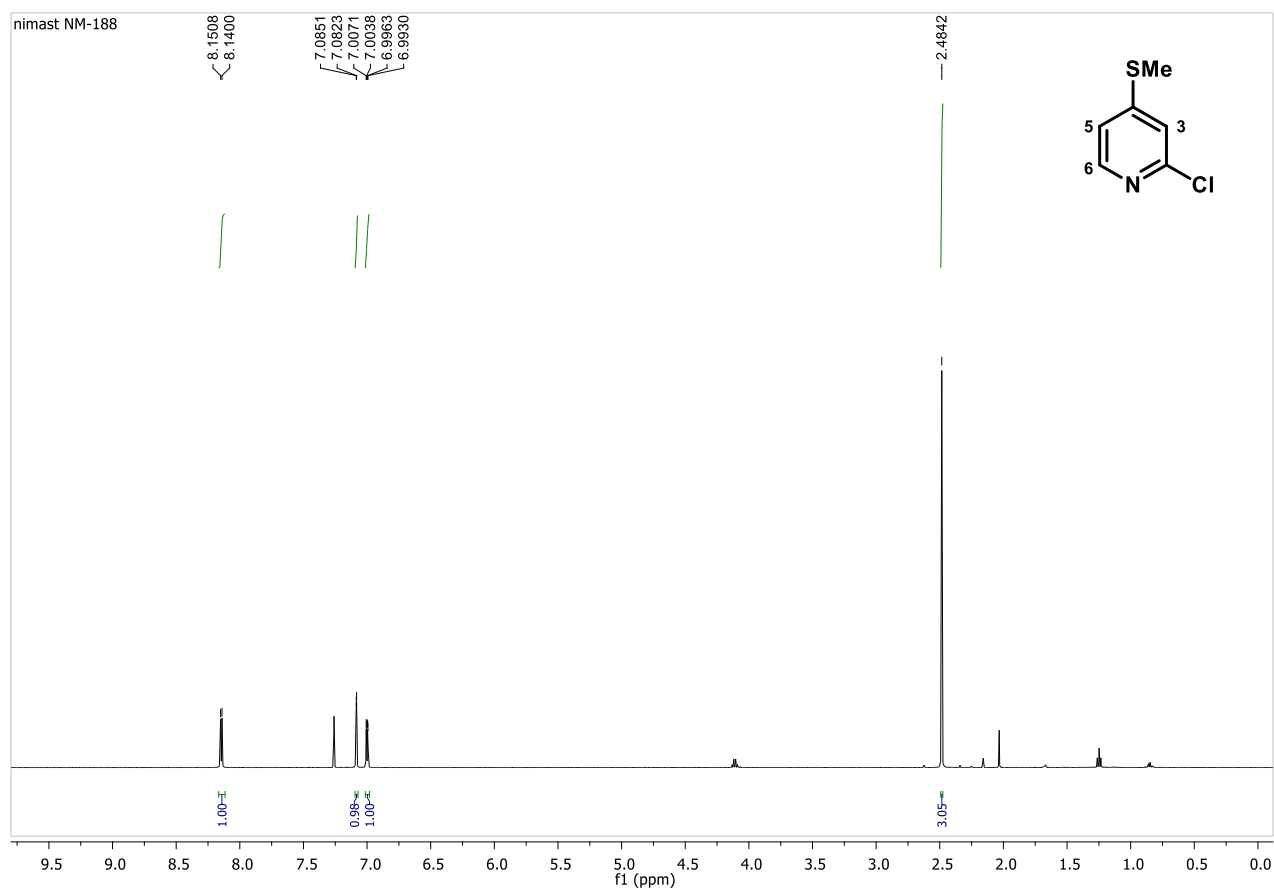

JMOD ( $\text{CDCl}_3$ , 300 K, 126 MHz)

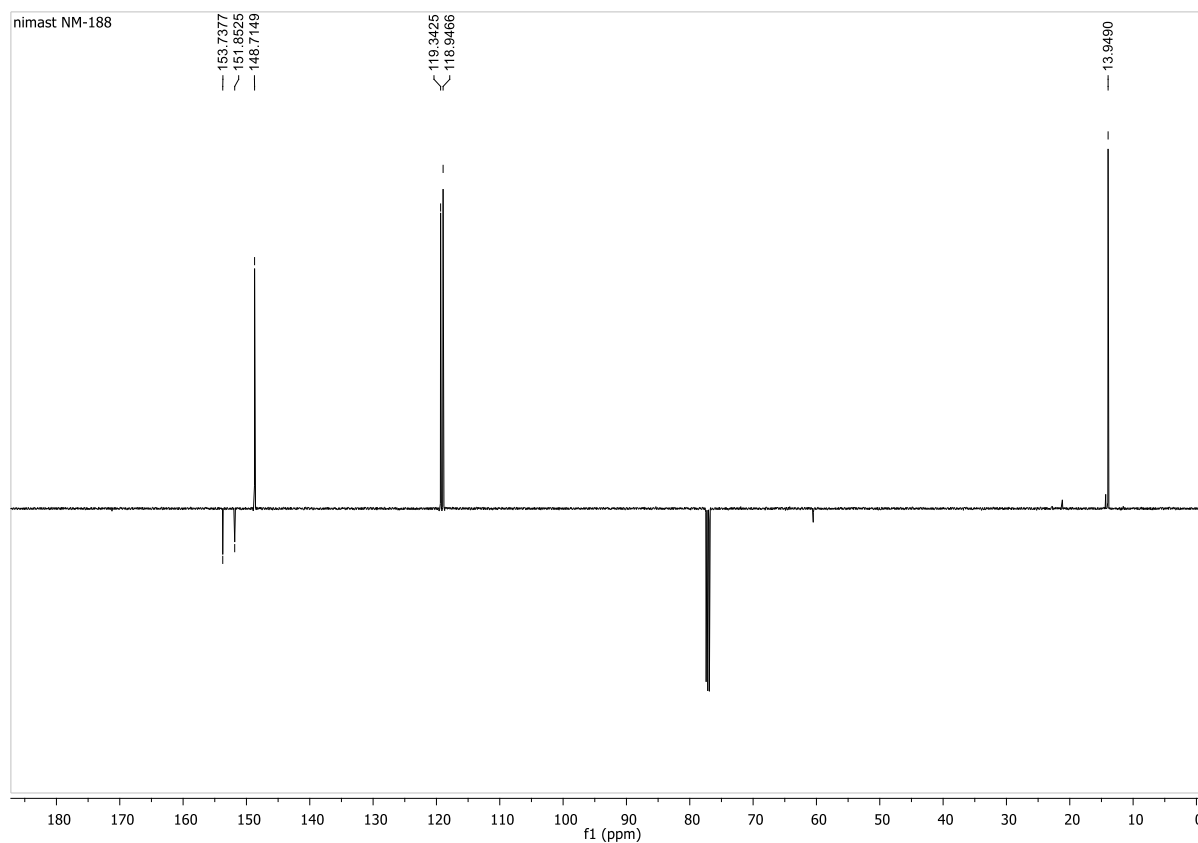

### 3-Benzoyl-2-chloro-4-(methylthio)pyridine (21)

$^1\text{H}$  ( $\text{CDCl}_3$ , 300 K, 300 MHz)

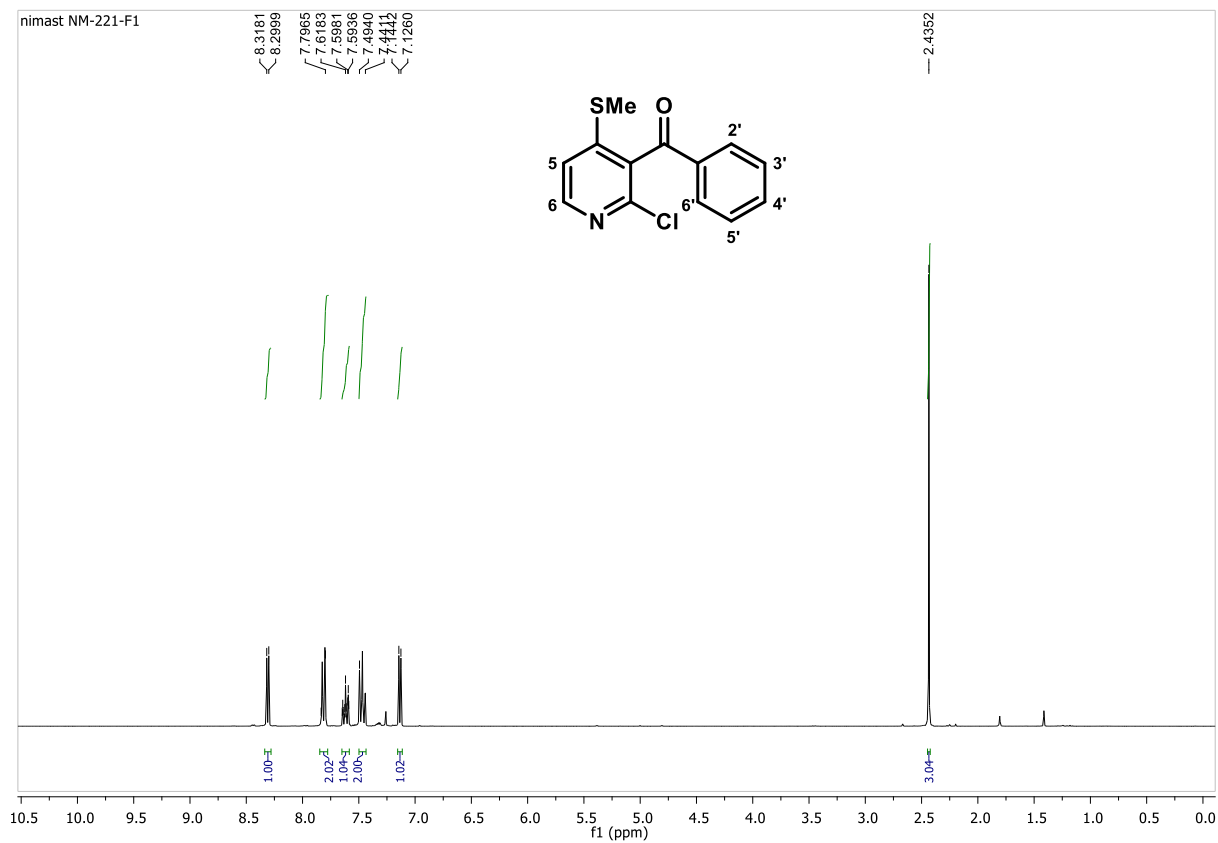

JMOD ( $\text{CDCl}_3$ , 300 K, 126 MHz)

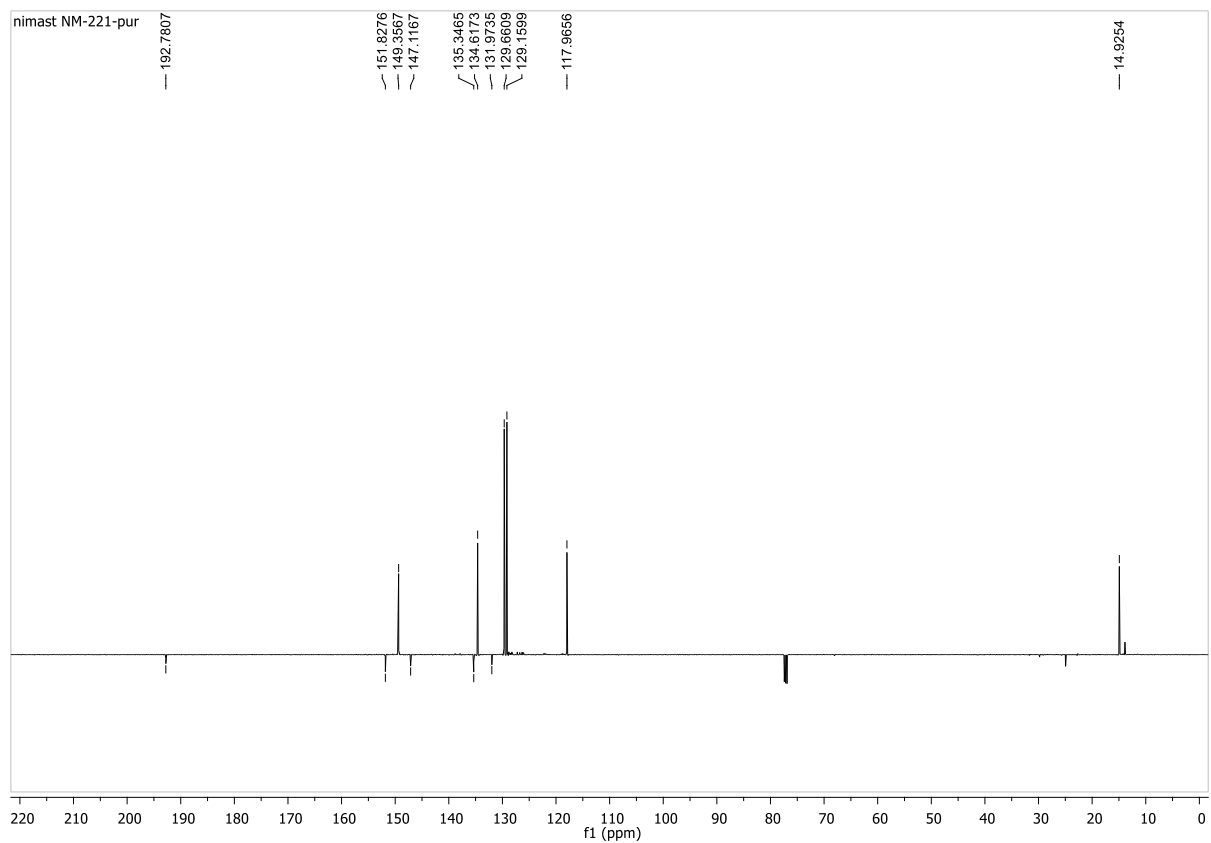

### 3-Benzoyl-2-chloro-4-(methylsulfinyl)pyridine (22a)

$^1\text{H}$  ( $\text{CDCl}_3$ , 300 K, 500 MHz)

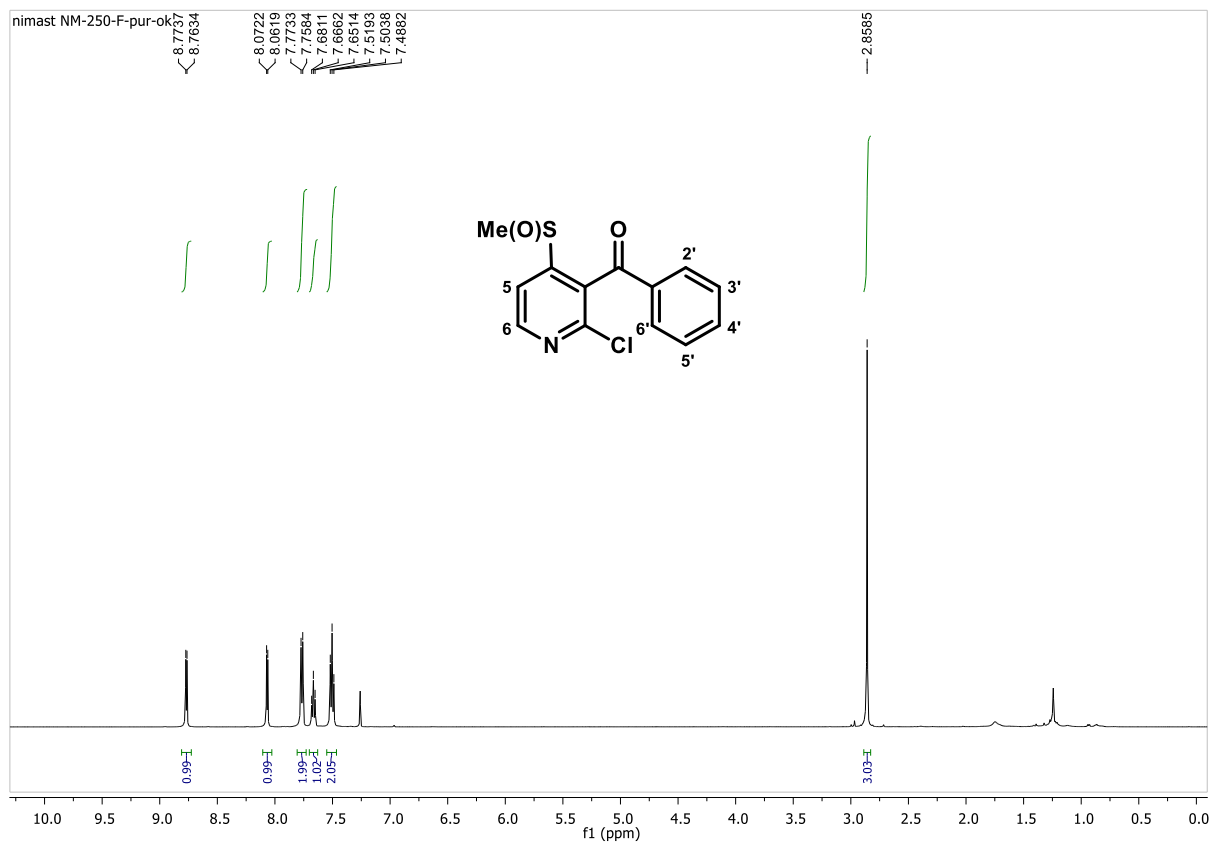

JMOD ( $\text{CDCl}_3$ , 300 K, 126 MHz)

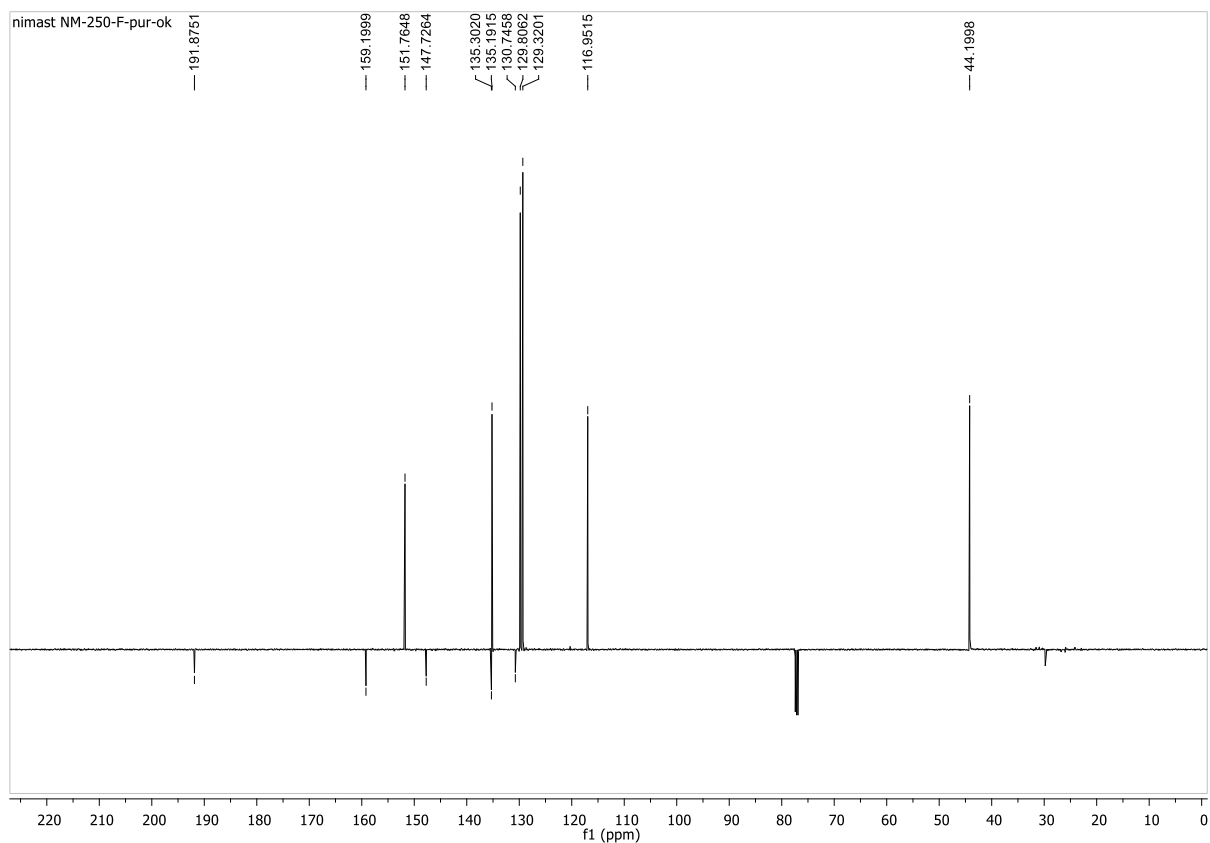

### 3-Benzoyl-2-chloro-4-(methanesulfonyl)pyridine (22b)

$^1\text{H}$  (CDCl<sub>3</sub>, 300 K, 300 MHz)

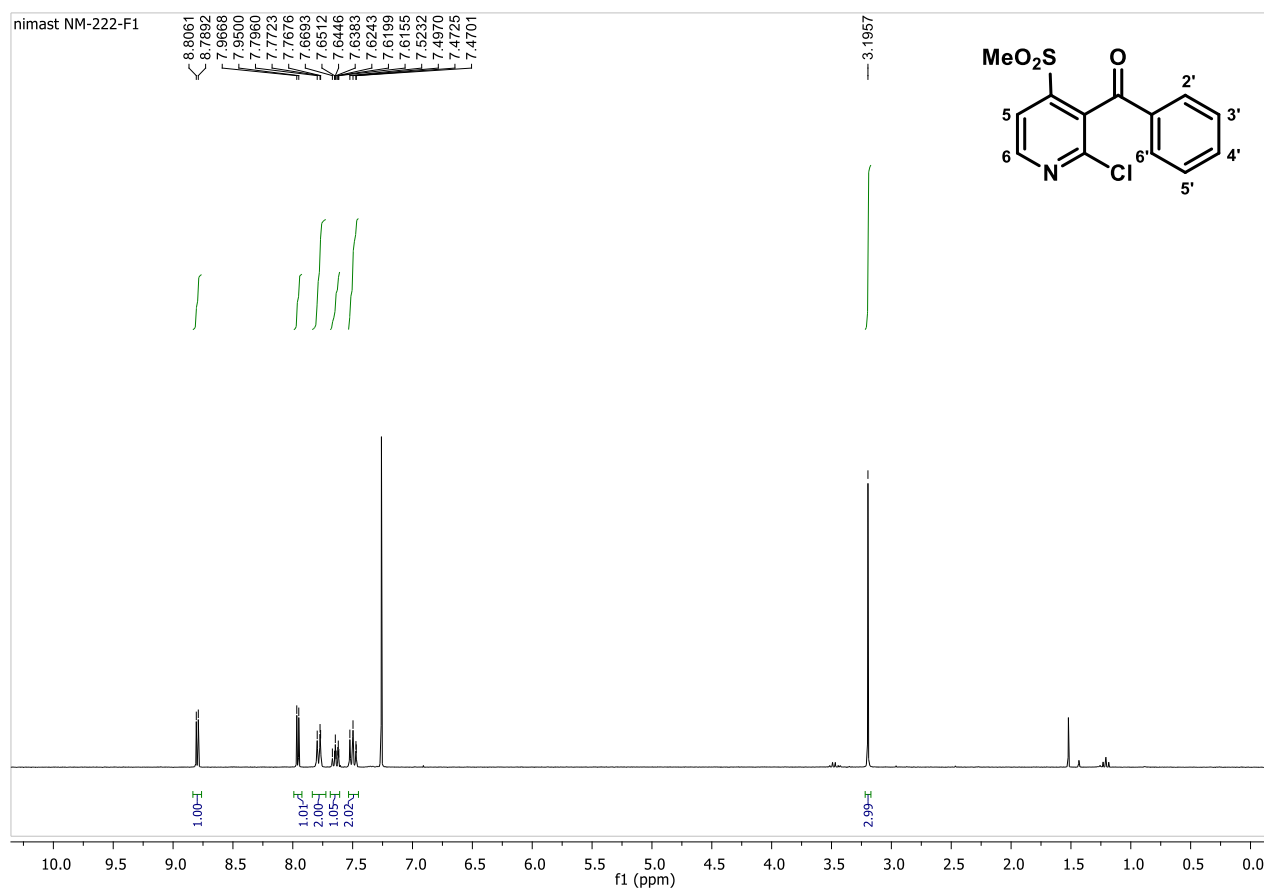

# 2-Fluoro-3-(2-(methylthio)benzoyl)pyridine (24a)

$^1\text{H}$  ( $\text{CDCl}_3$ , 300 K, 300 MHz)

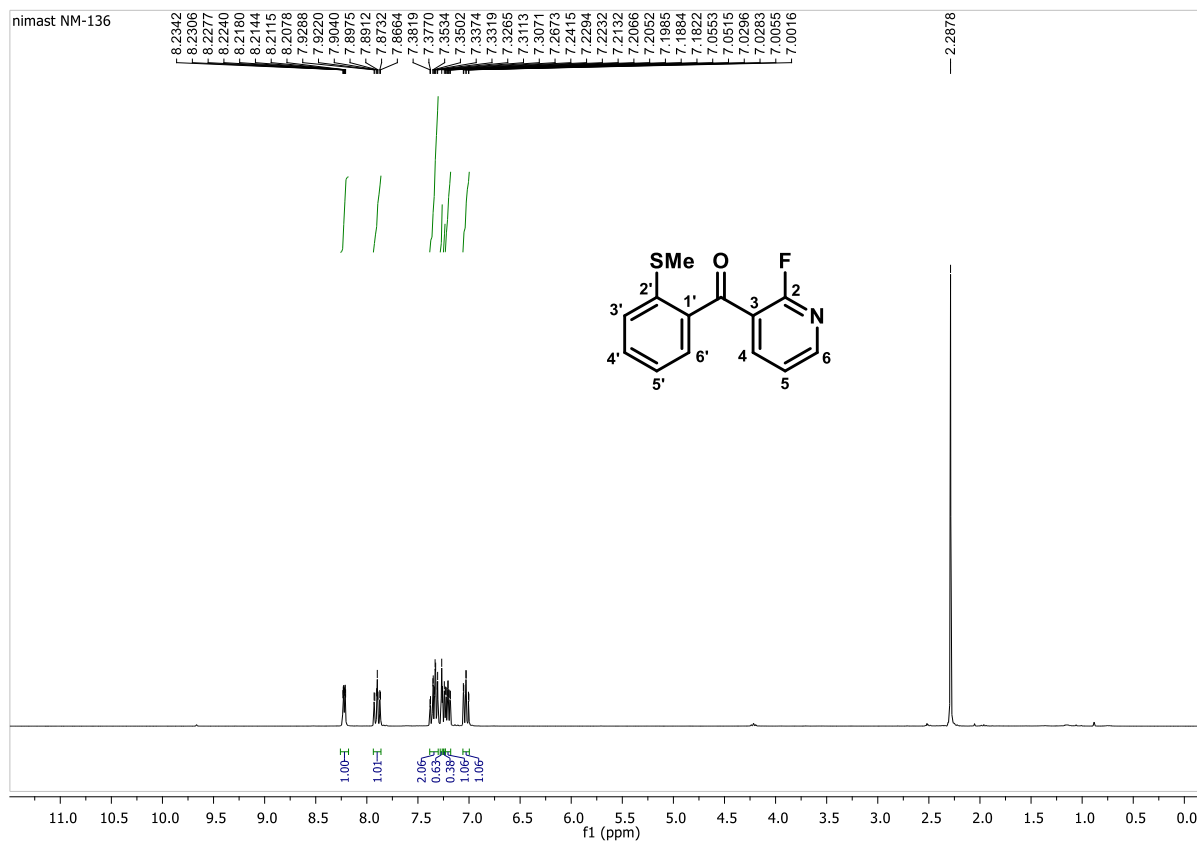

JMOD ( $\text{CDCl}_3$ , 300 K, 75 MHz)

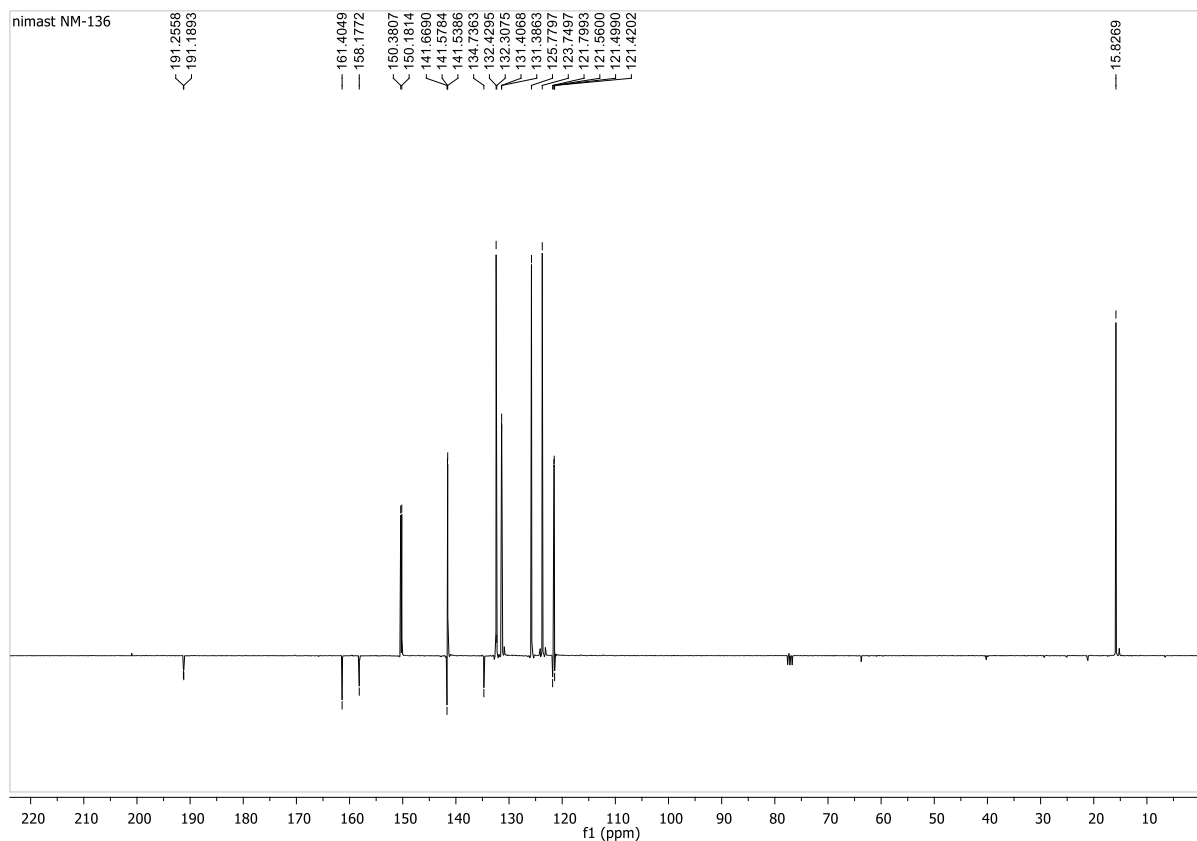

$^{19}\text{F}$  ( $\text{CDCl}_3$ , 300 K, 282 MHz)

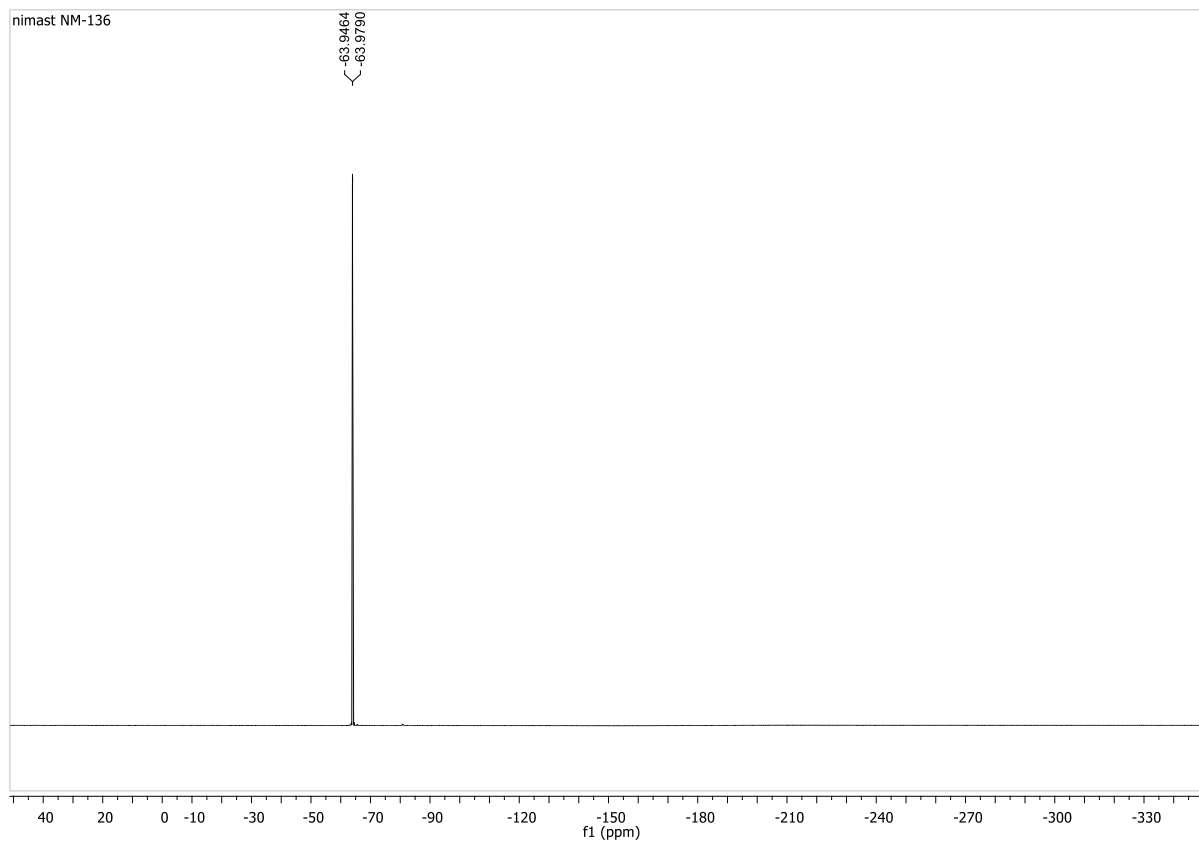



## 2-Fluoro-3-(5-chloro-2-fluorobenzoyl)pyridine (24b)

$^1\text{H}$  ( $\text{CDCl}_3$ , 300 K, 500 MHz)

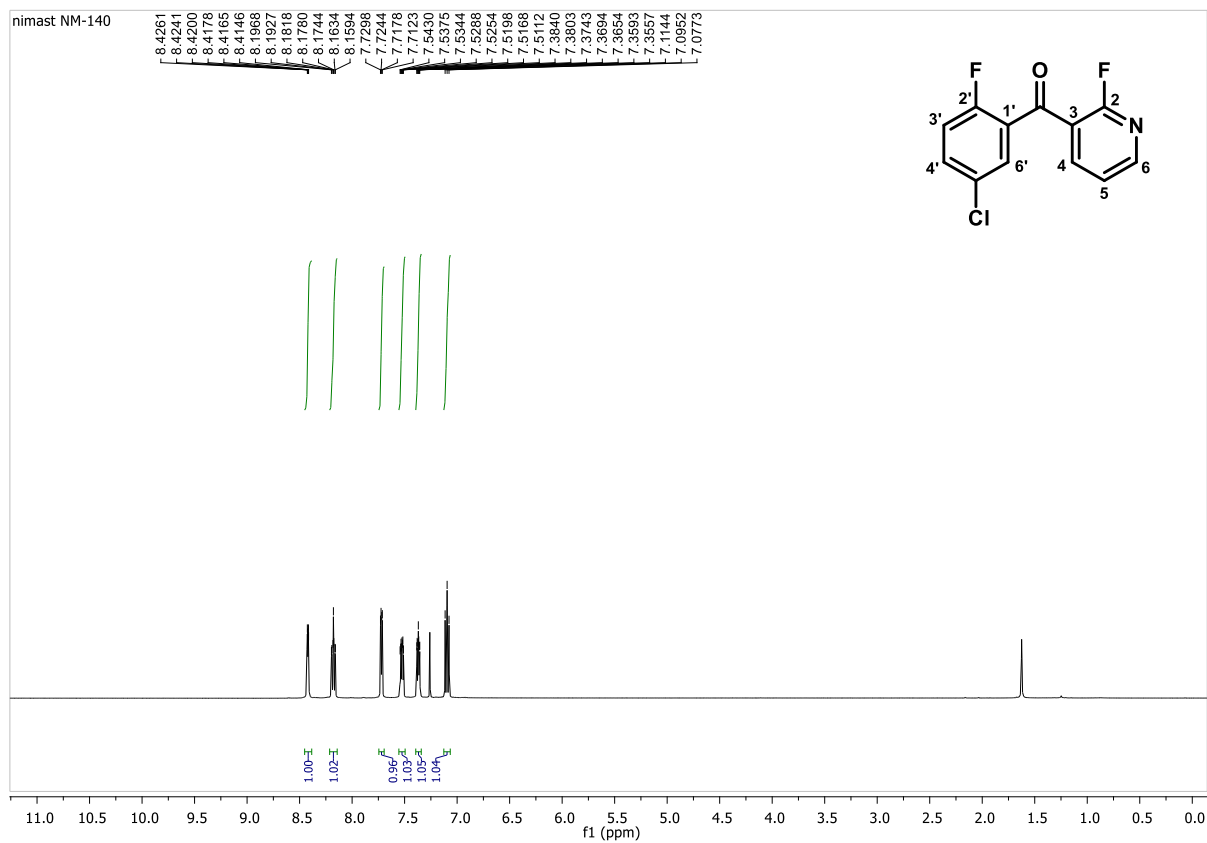

JMOD ( $\text{CDCl}_3$ , 300 K, 126 MHz)

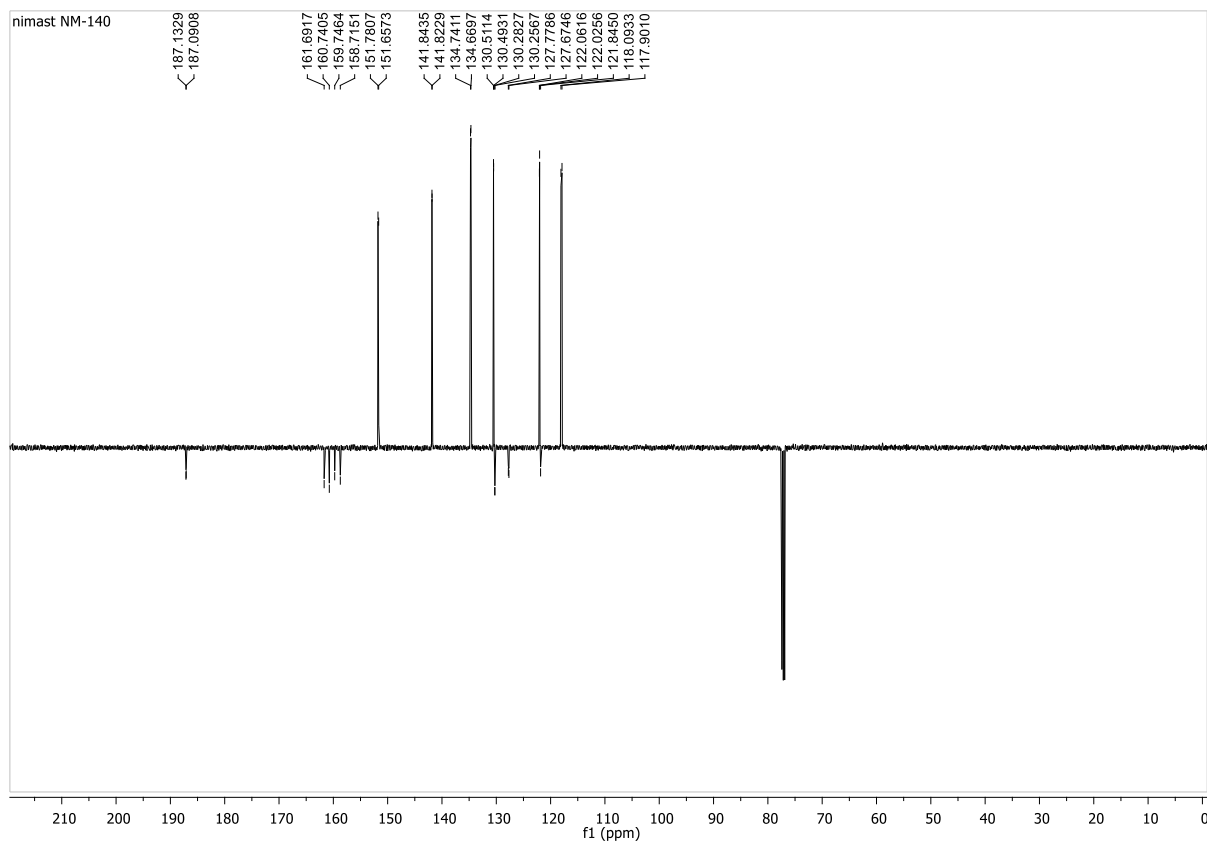

$^{19}\text{F}$  ( $\text{CDCl}_3$ , 300 K, 471 MHz)

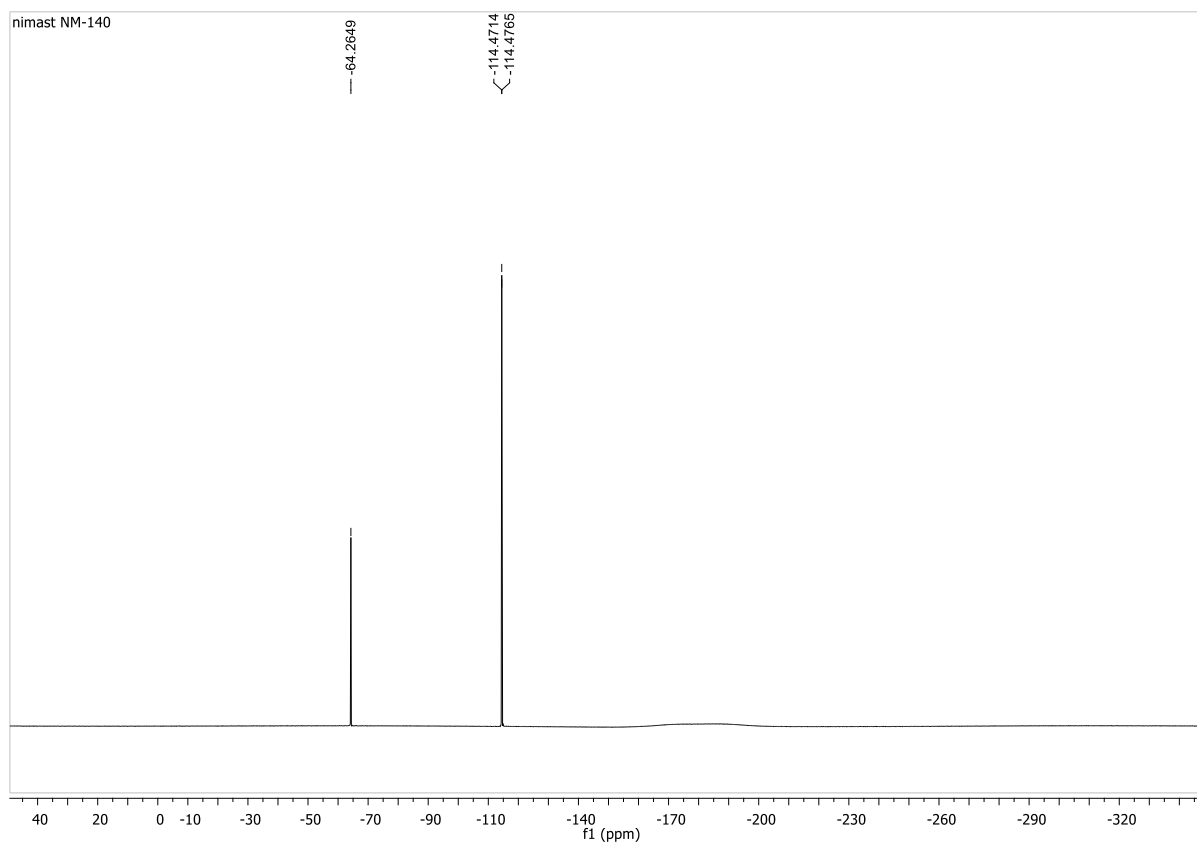

## 2-Amino-3-(2-(methylthio)benzoyl)pyridine (23)

$^1\text{H}$  ( $\text{CDCl}_3$ , 300 K, 500 MHz)

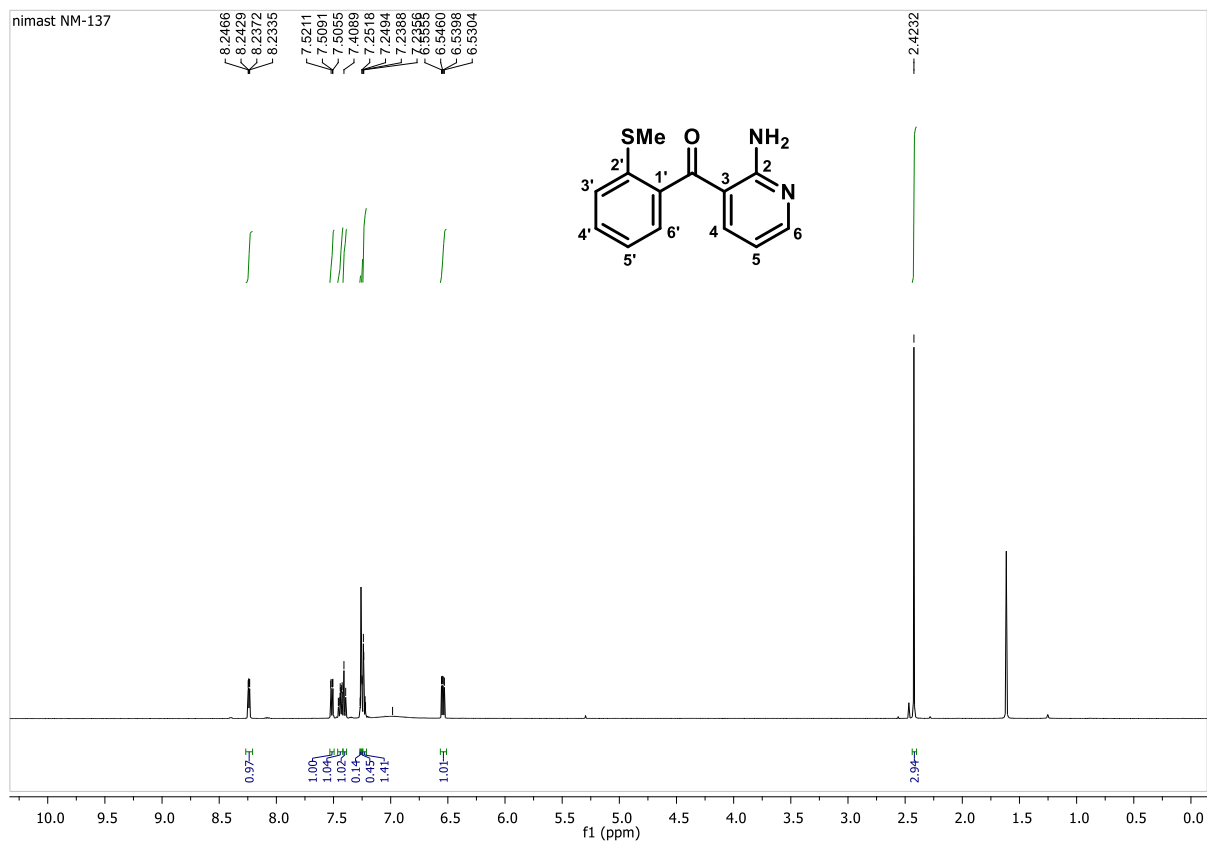

JMOD ( $\text{CDCl}_3$ , 300 K, 126 MHz)

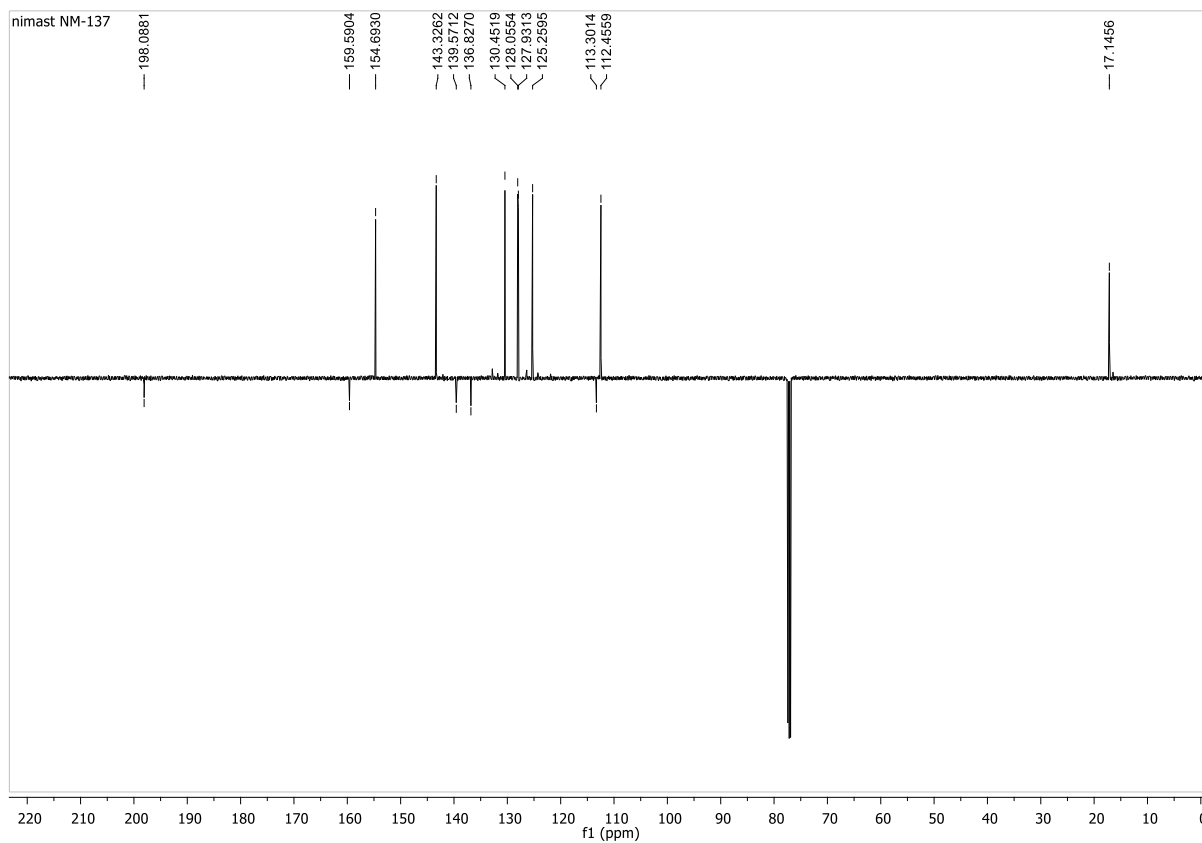

# 2-Amino-3-(5-chloro-2-fluorobenzoyl)pyridine (25)

$^1\text{H}$  ( $\text{CDCl}_3$ , 300 K, 500 MHz)

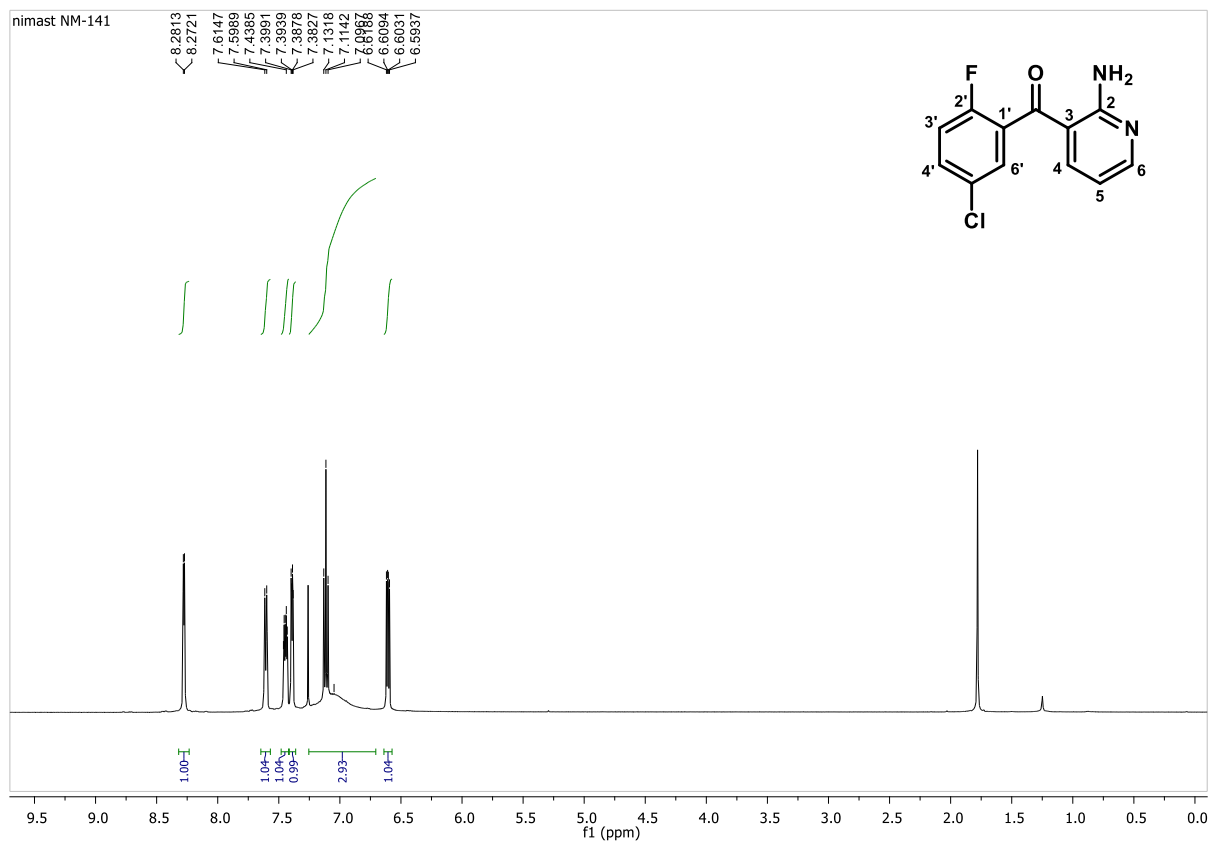

JMOD ( $\text{CDCl}_3$ , 300 K, 126 MHz)

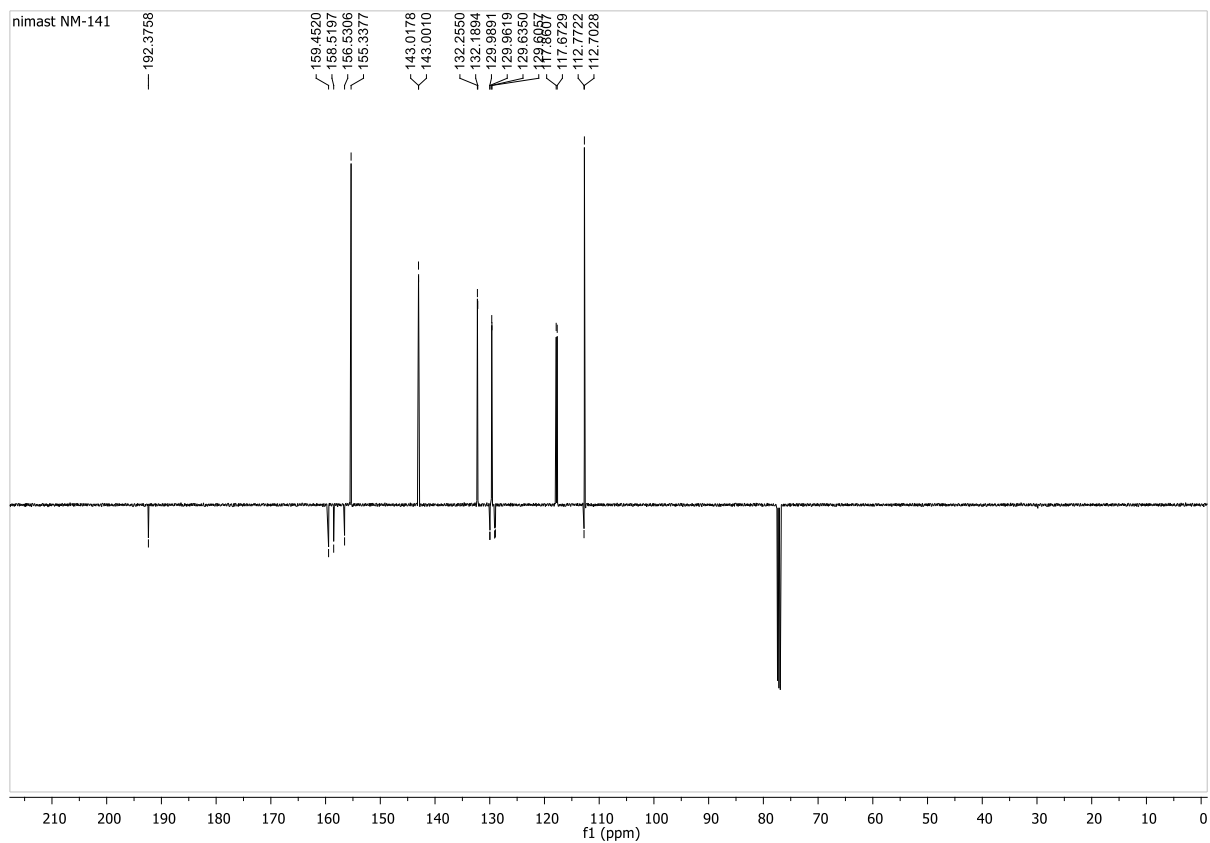

$^{19}\text{F}$  ( $\text{CDCl}_3$ , 300 K, 471 MHz)

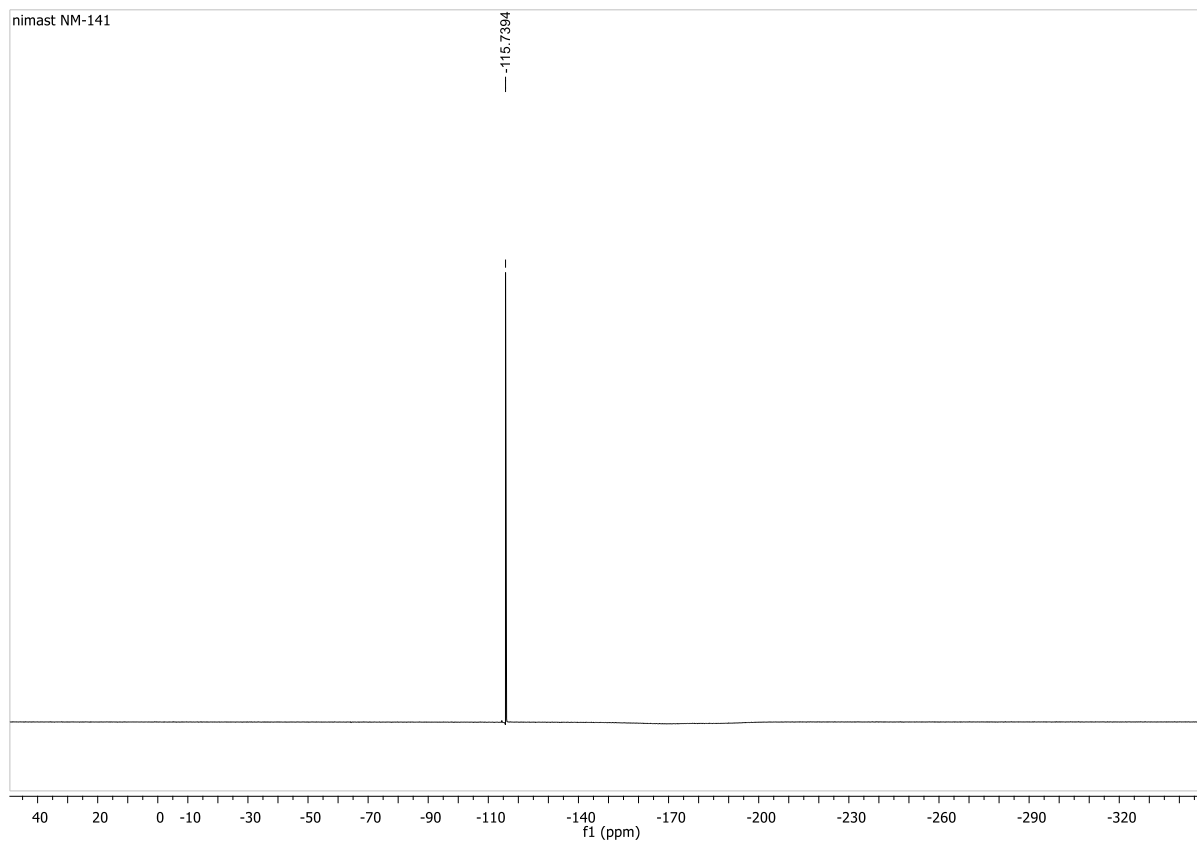

# 11-(2-(Methylthio)phenyl)benzofuro[2,3-b]1,8-naphthyridine (26)

$^1\text{H}$  (CDCl<sub>3</sub>, 300 K, 500 MHz)

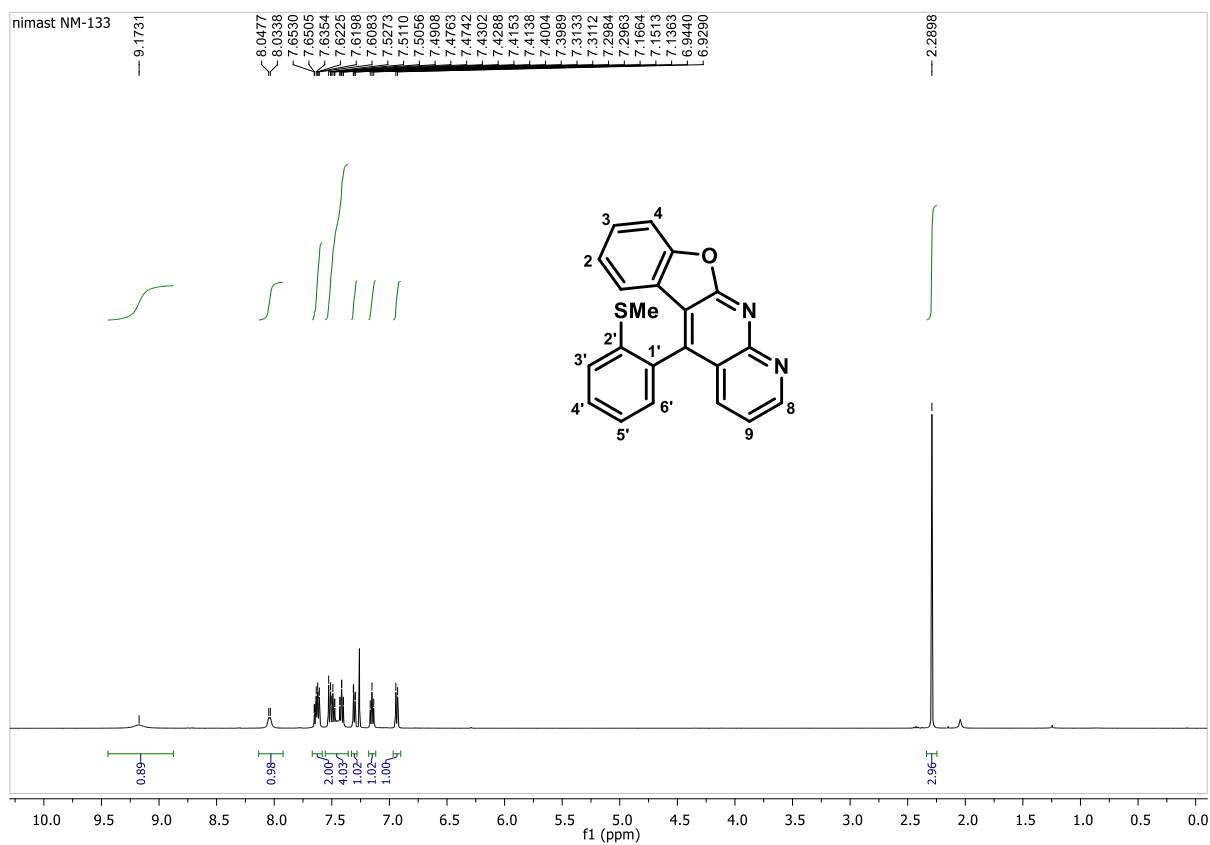

JMOD (CDCl<sub>3</sub>, 300 K, 126 MHz)

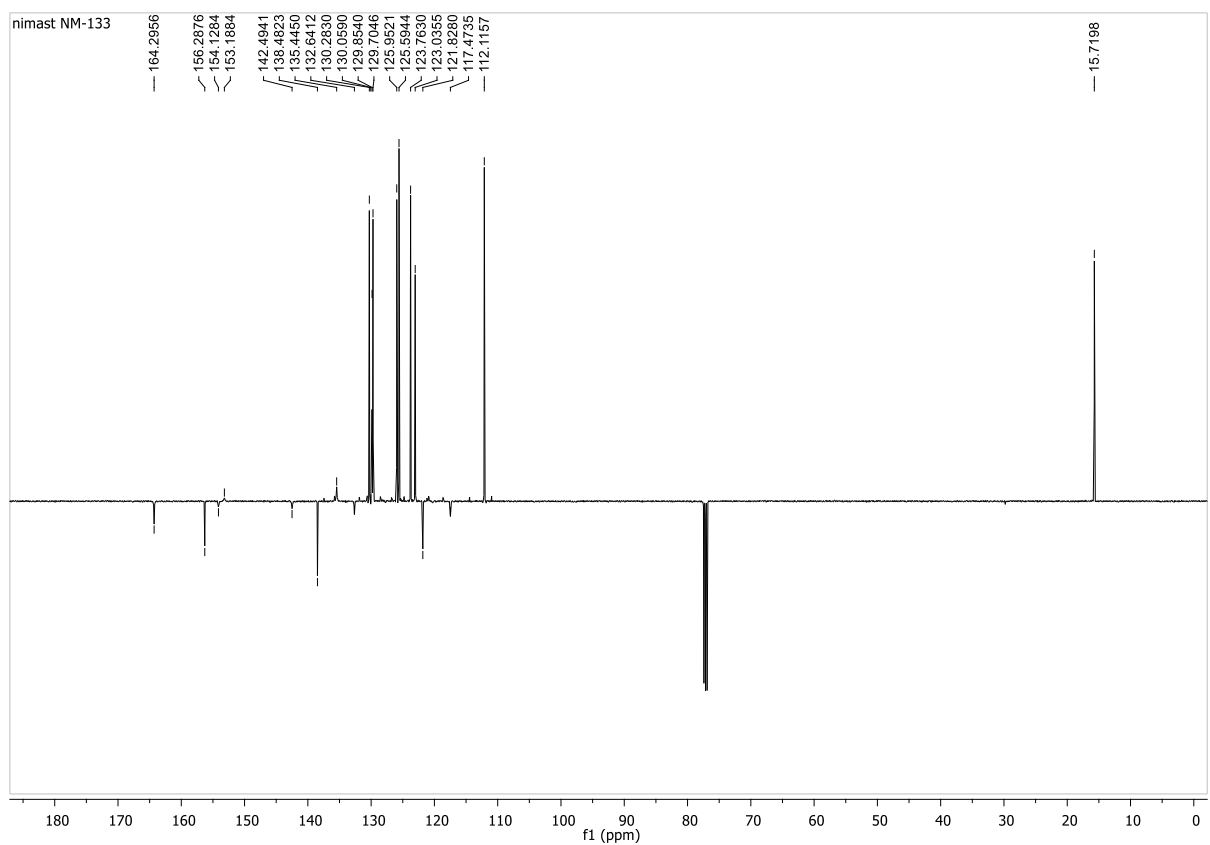

# 11-(2-(Methylsulfinyl)phenyl)benzofuro[2,3-b]1,8-naphthyridine (27)

$^1\text{H}$  (CDCl<sub>3</sub>, 300 K, 300 MHz)

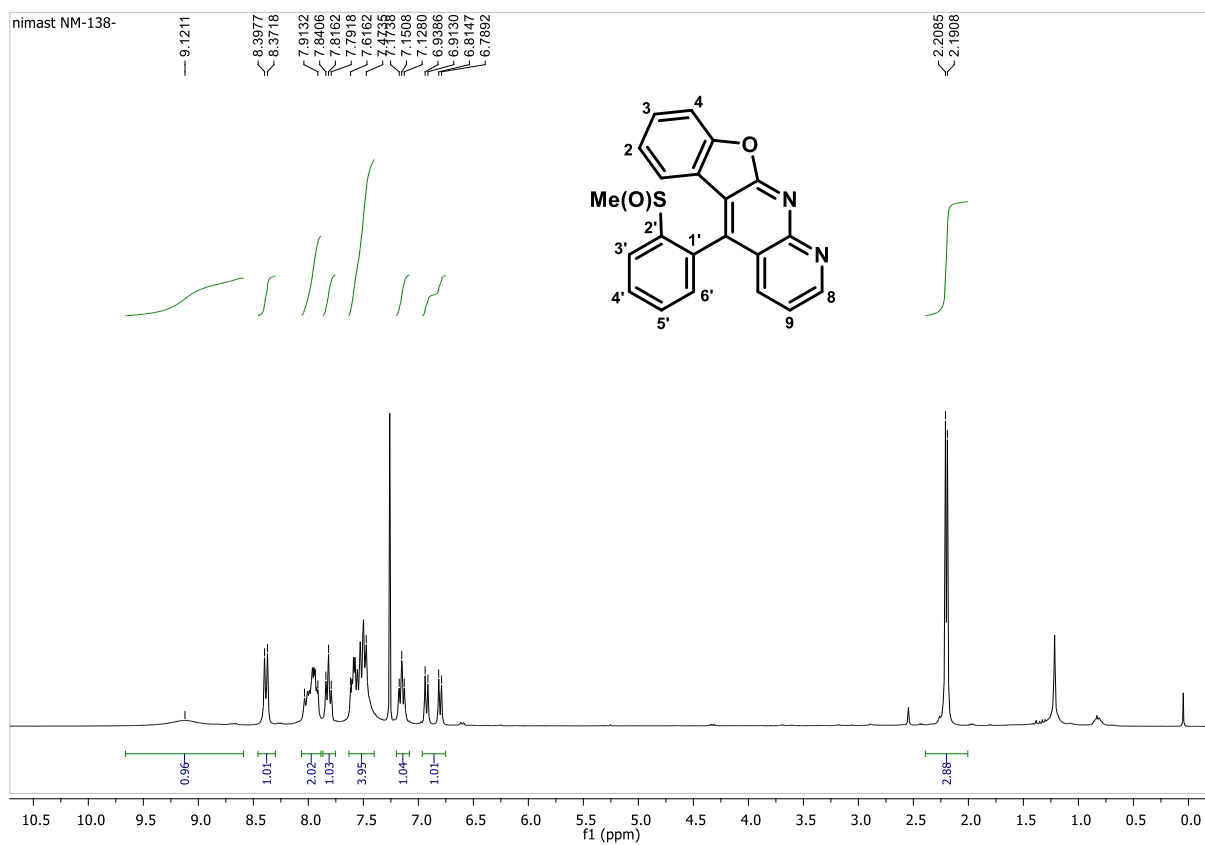

JMOD (CDCl<sub>3</sub>, 300 K, 126 MHz)

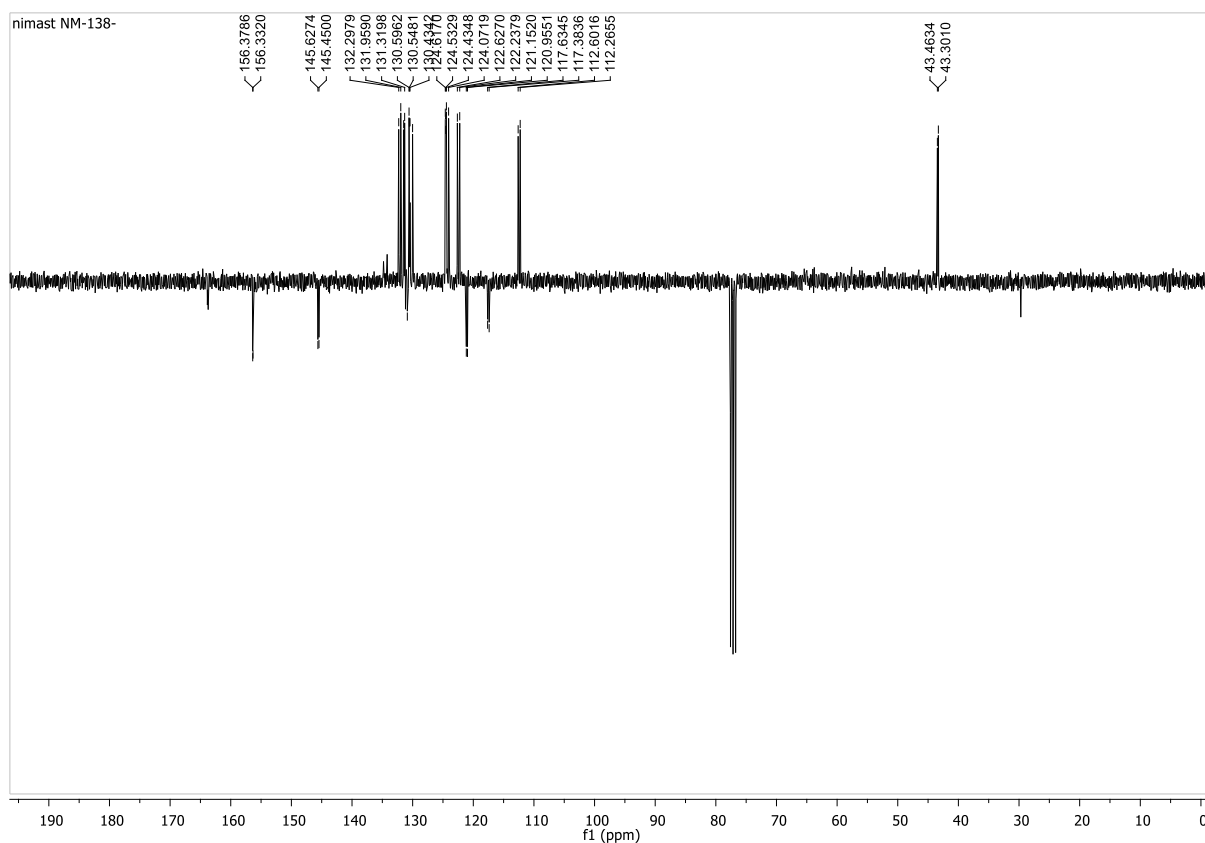

$^1\text{H}$  ( $(\text{CD}_3)_2\text{SO}$ , 300 K, 500 MHz)

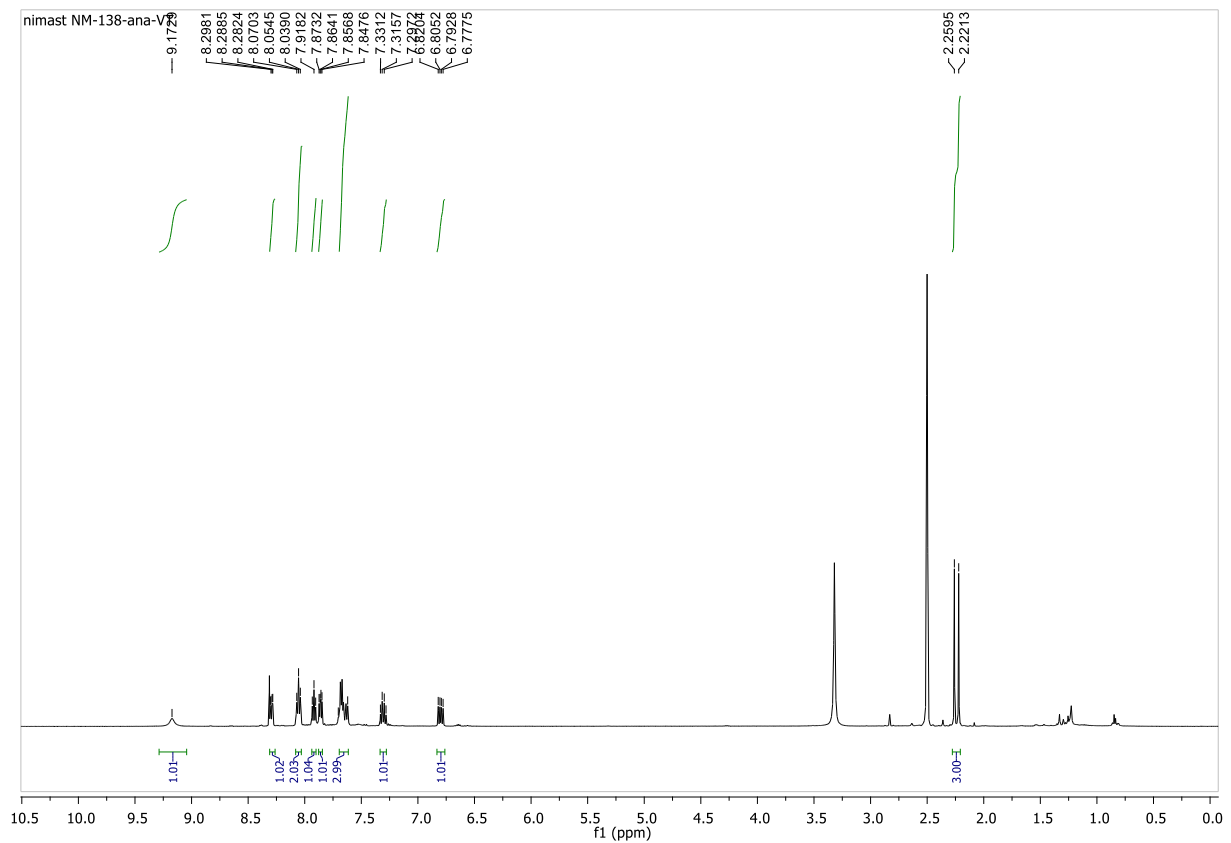

$^1\text{H}$  ( $(\text{CD}_3)_2\text{SO}$ , 375 K, 500 MHz)

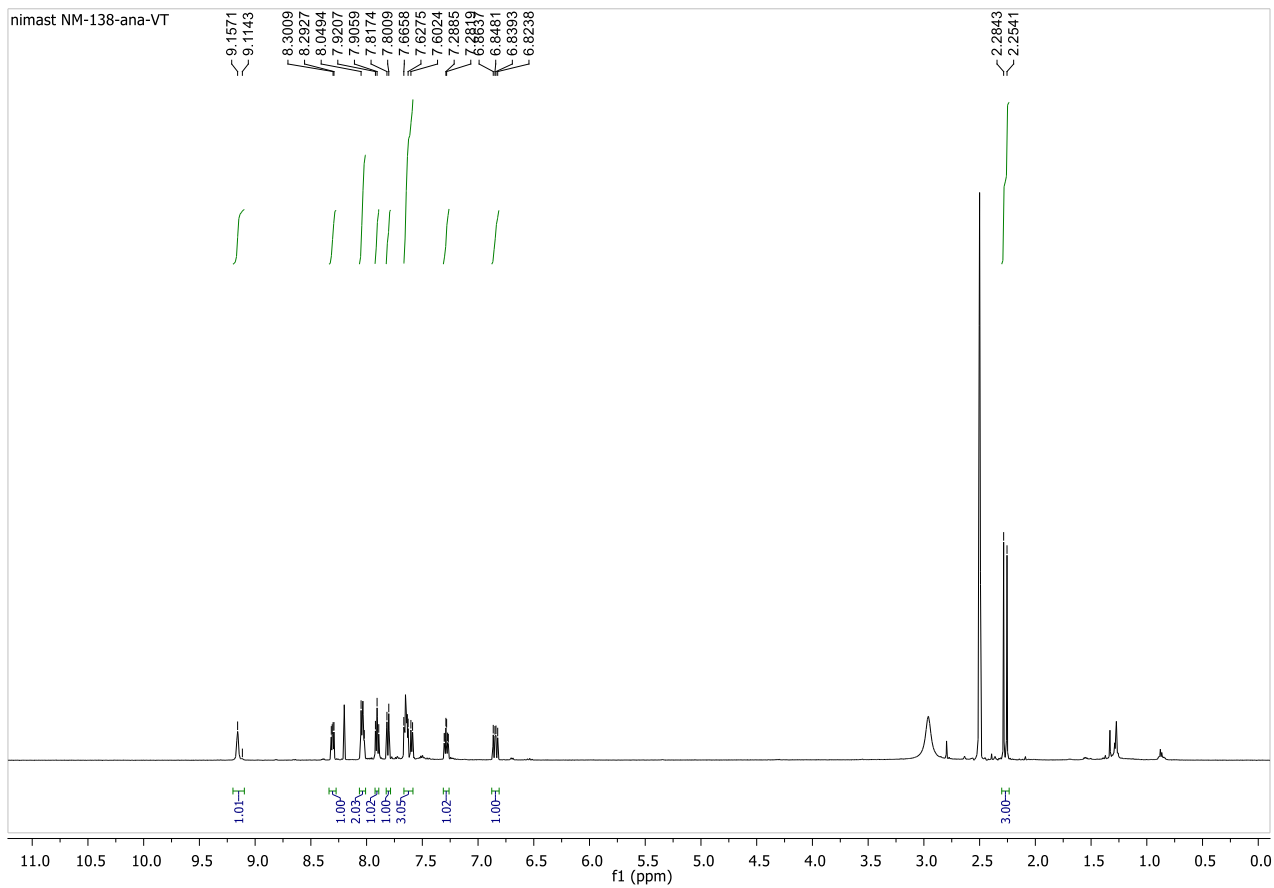



JMOD ((CD<sub>3</sub>)<sub>2</sub>SO, 375 K, 126 MHz)

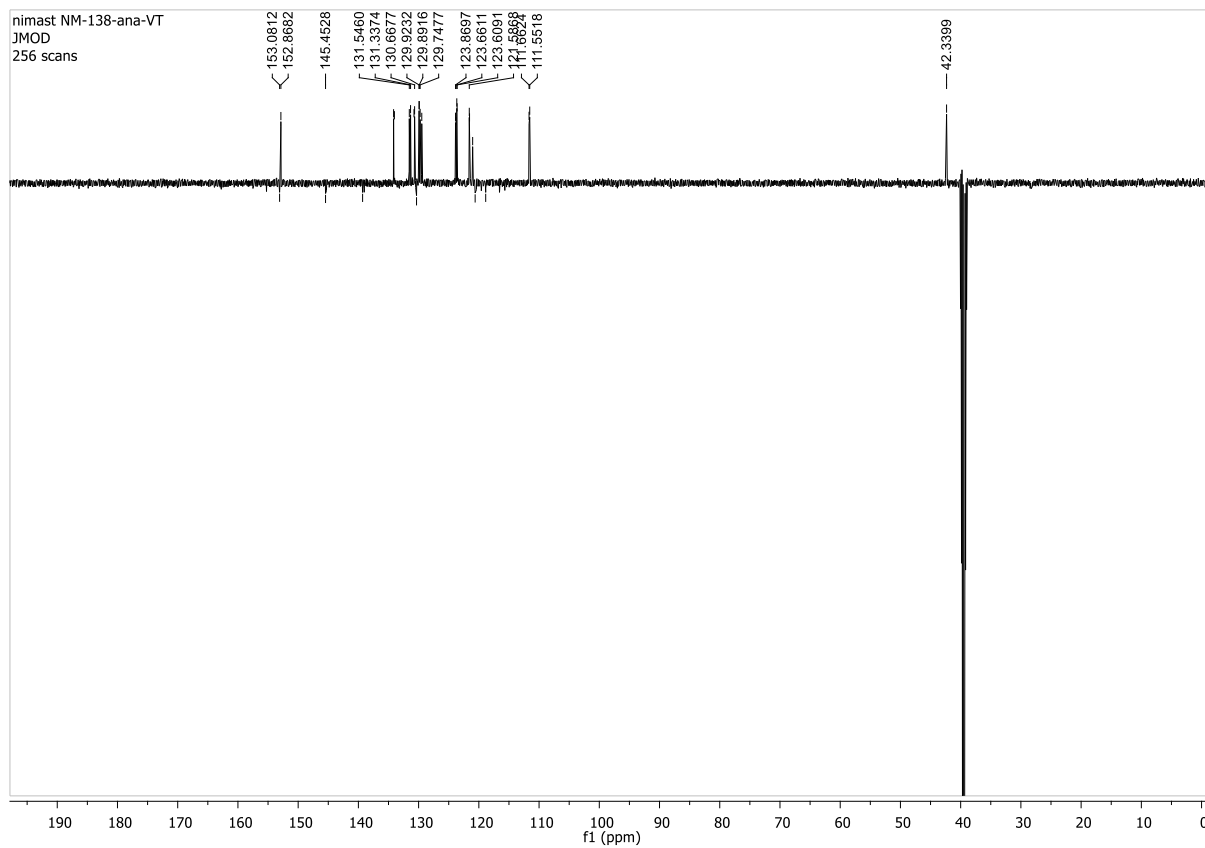

***tert*-Butyl *N*-(2-pyridyl)carbamate**

$^1\text{H}$  (CDCl<sub>3</sub>, 300 K, 500 MHz)

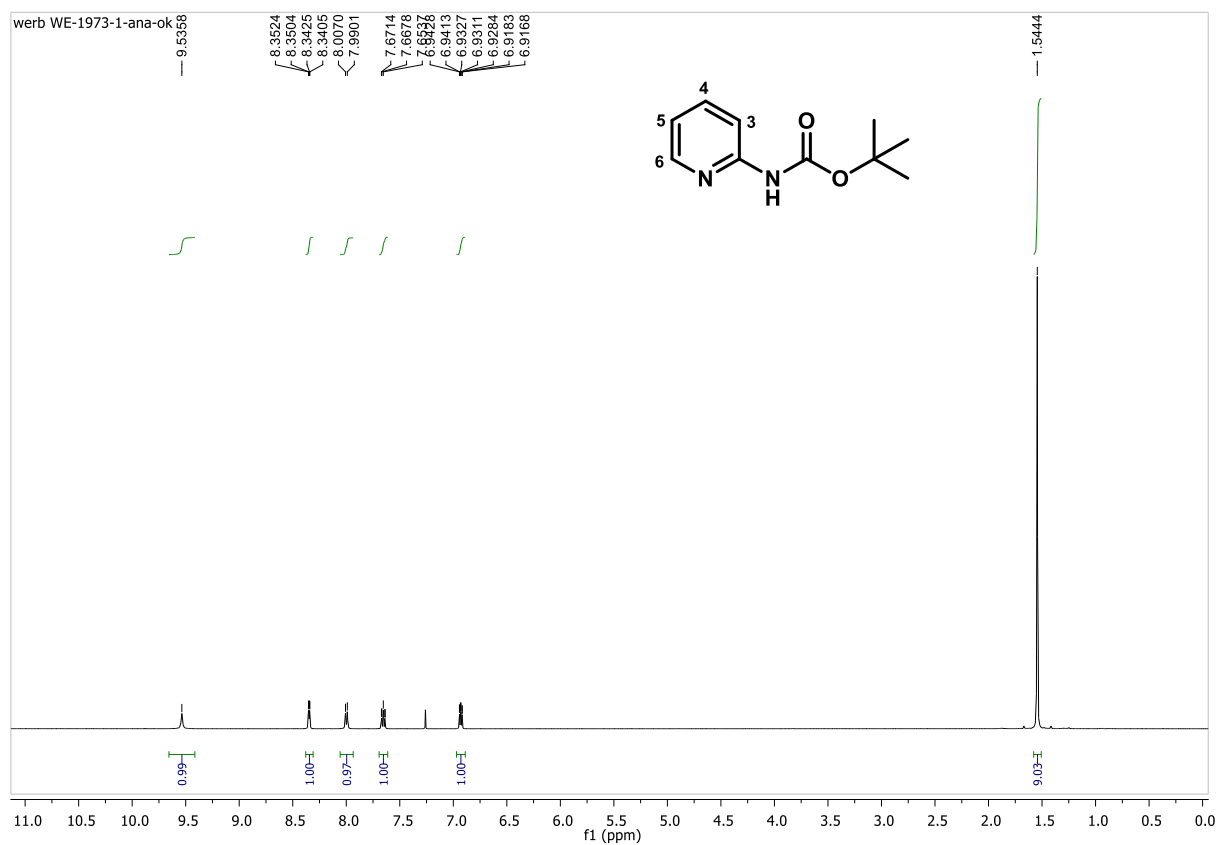

JMOD (CDCl<sub>3</sub>, 300 K, 126 MHz)

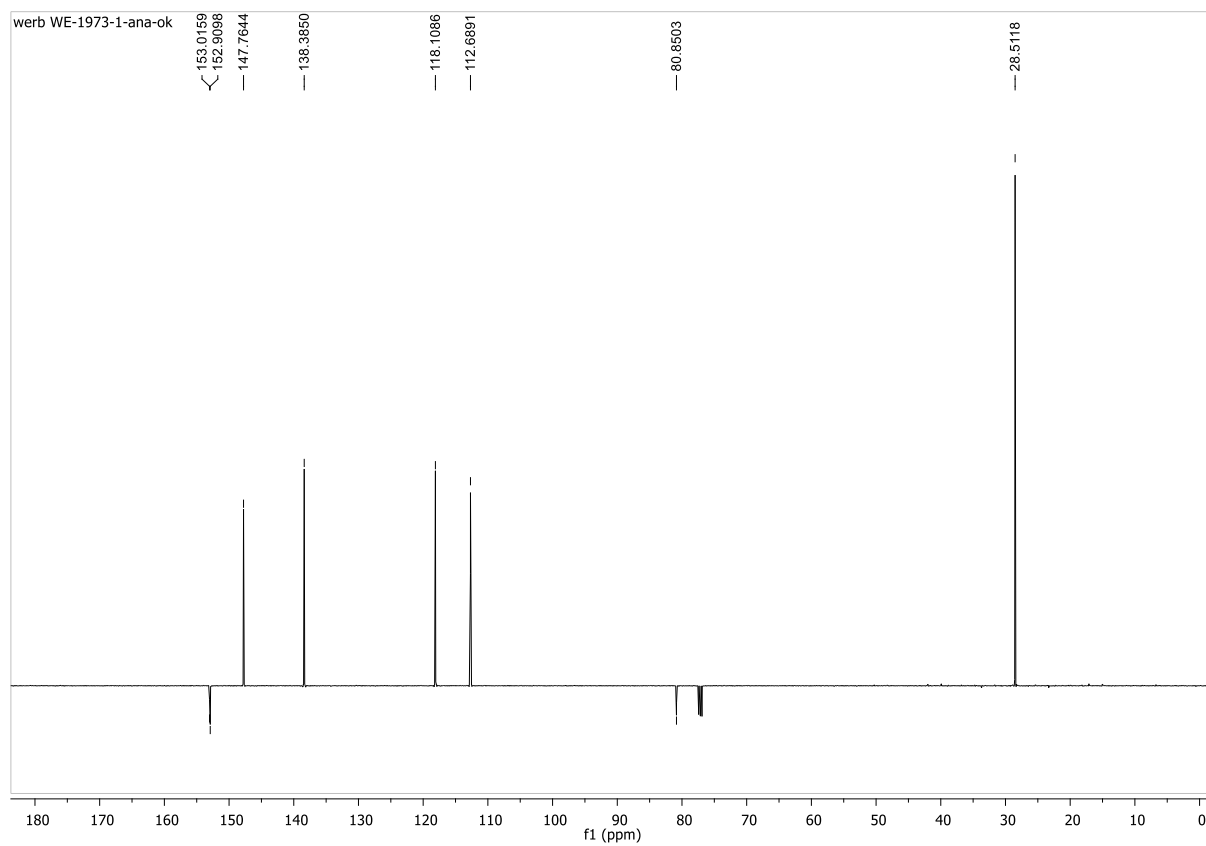

## 2-(*tert*-Butoxycarbonylamino)-3-((1-phenyl)hydroxymethyl)pyridine (29)

$^1\text{H}$  ( $\text{CDCl}_3$ , 300 K, 500 MHz)

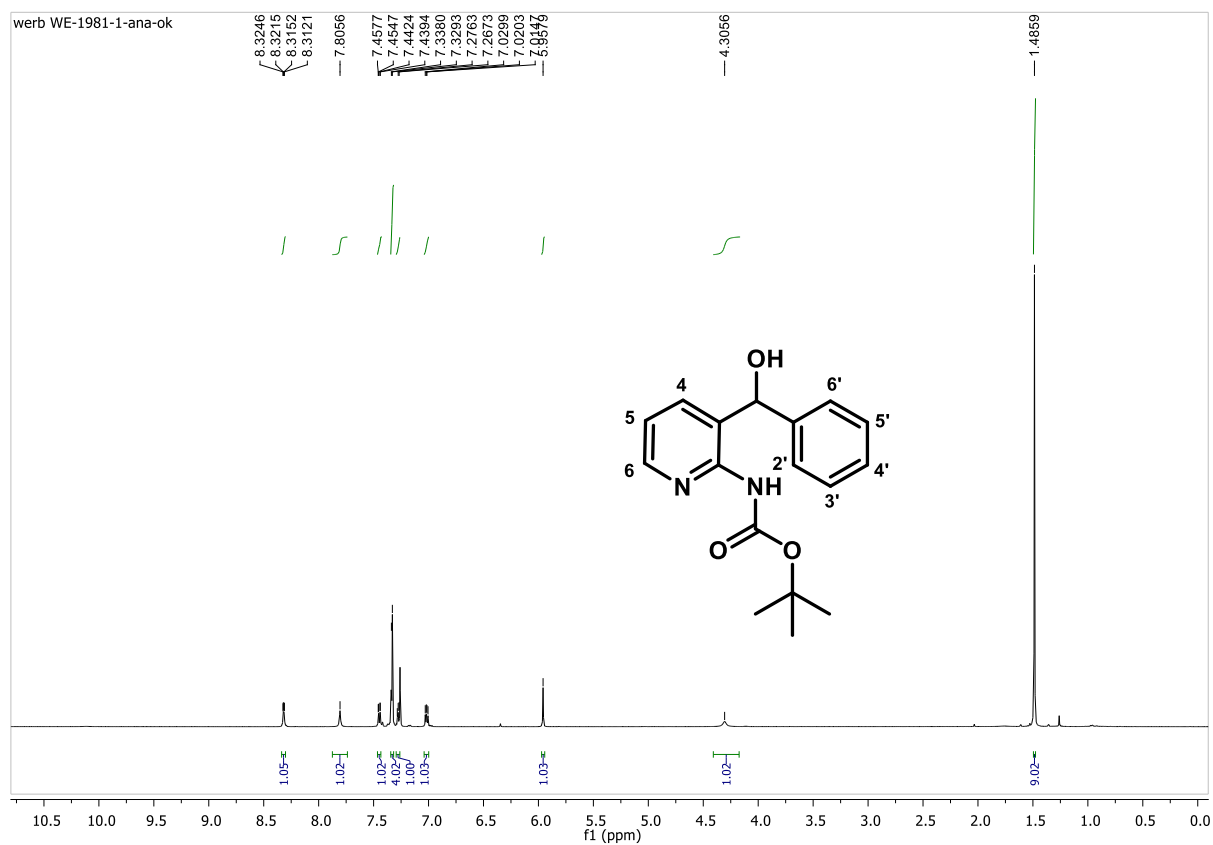

JMOD ( $\text{CDCl}_3$ , 300 K, 126 MHz)

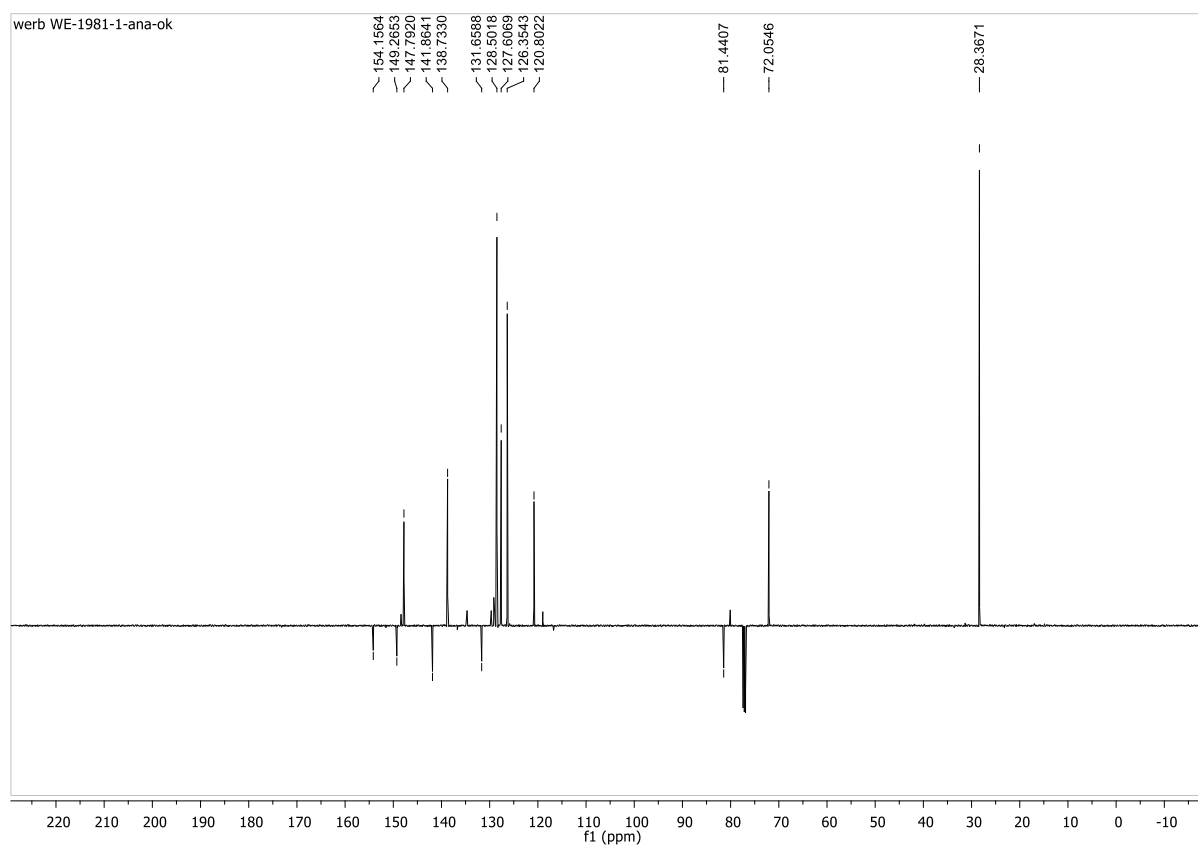

# 2-((*tert*-Butoxycarbonyl)(methoxymethyl)amino)pyridine

$^1\text{H}$  ( $\text{CDCl}_3$ , 300 K, 500 MHz)

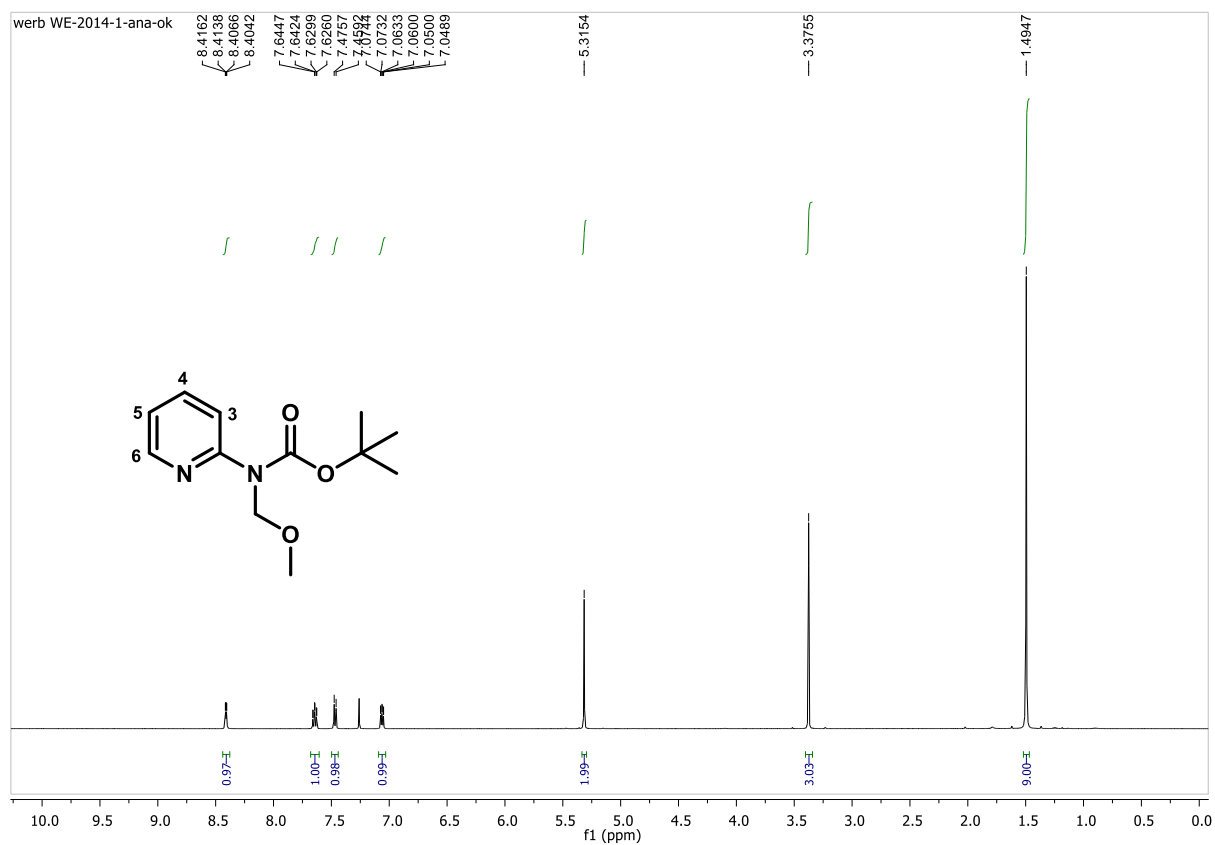

JMOD ( $\text{CDCl}_3$ , 300 K, 126 MHz)

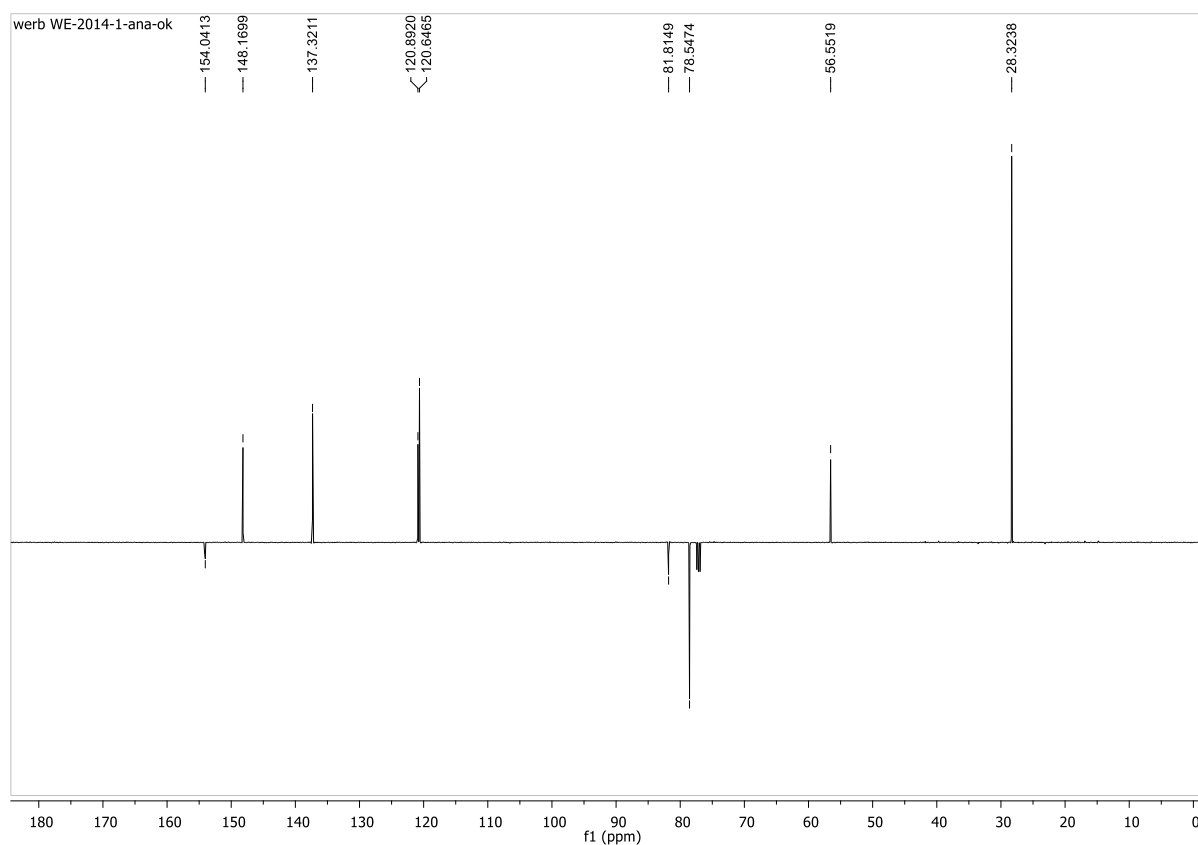

# 1,4-Dihydro-4-phenylpyrido[2,3-d][1,3]2-oxazinone

$^1\text{H}$  (CDCl<sub>3</sub>, 300 K, 500 MHz)

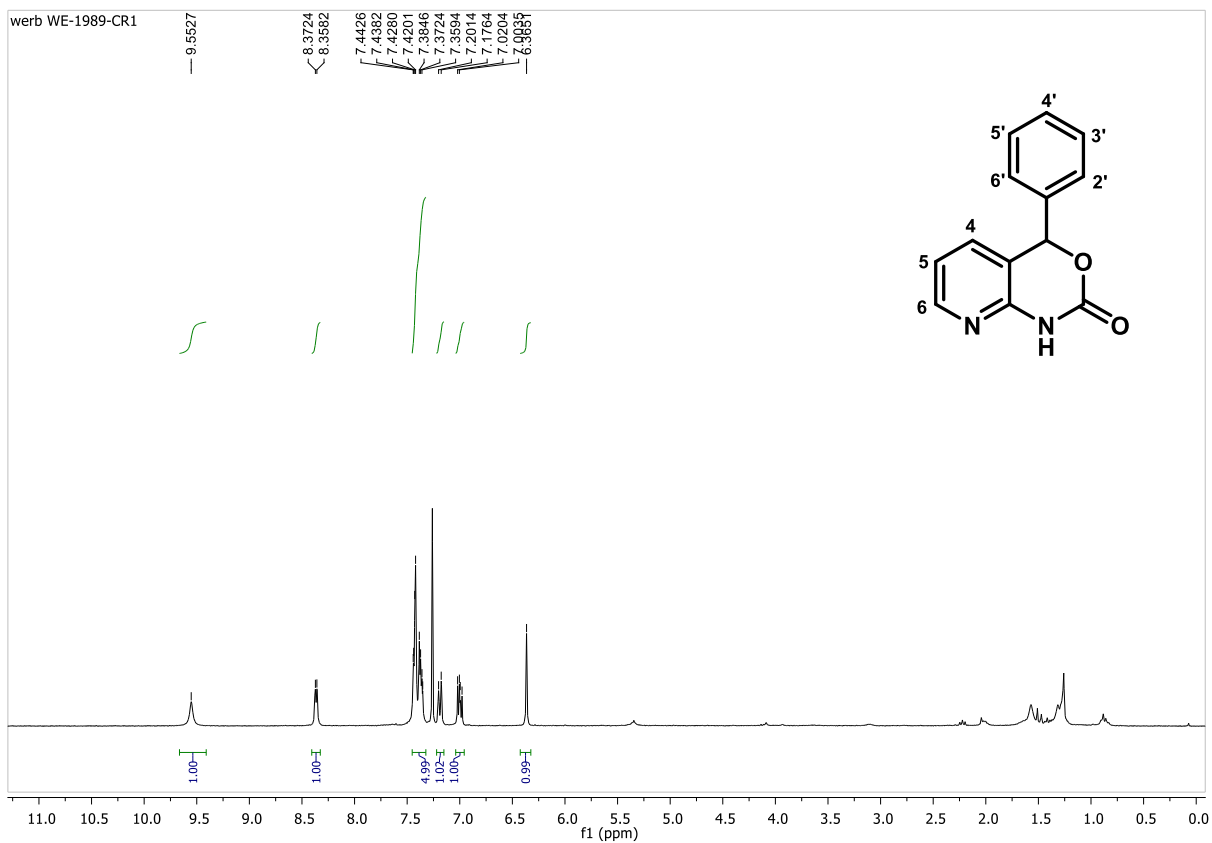

### 3-Benzoyl-2-(*tert*-butoxycarbonylamino)pyridine (30)

$^1\text{H}$  ( $\text{CDCl}_3$ , 300 K, 500 MHz)

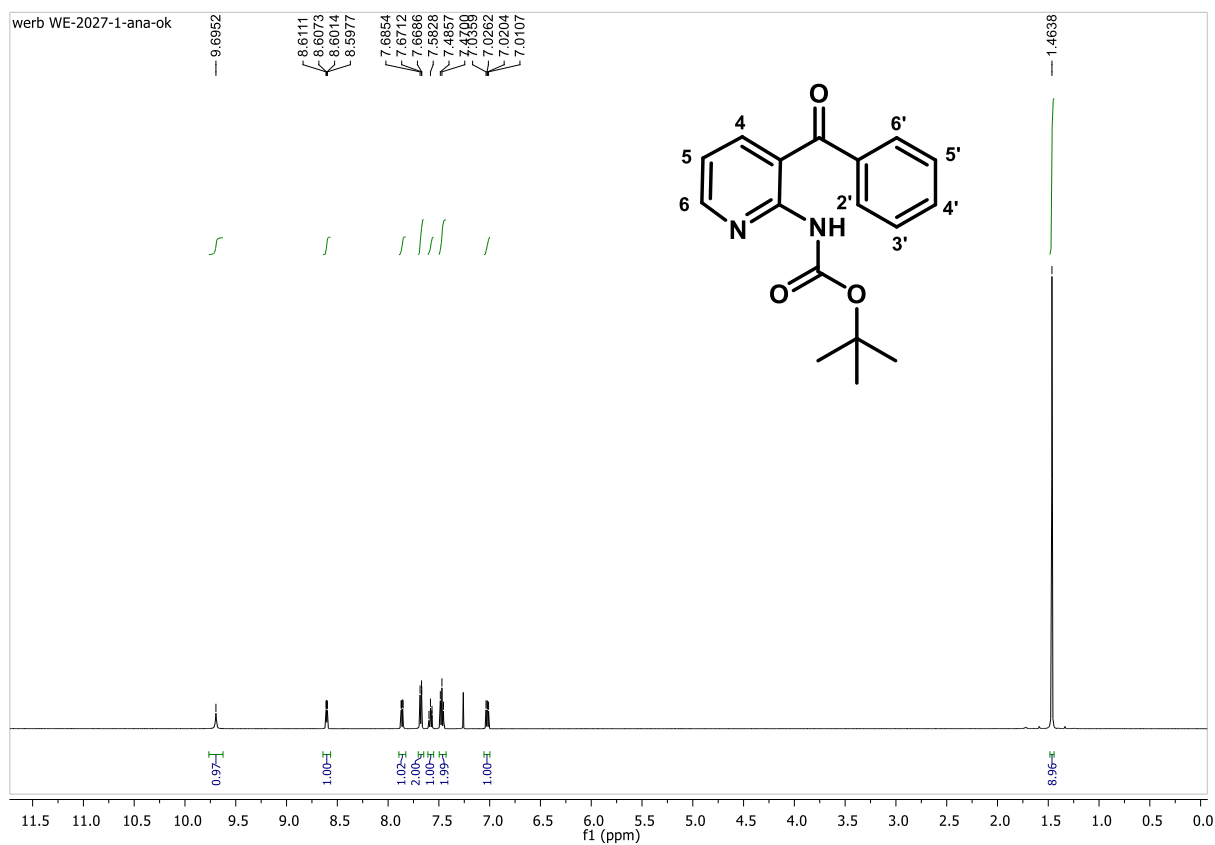

JMOD ( $\text{CDCl}_3$ , 300 K, 126 MHz)

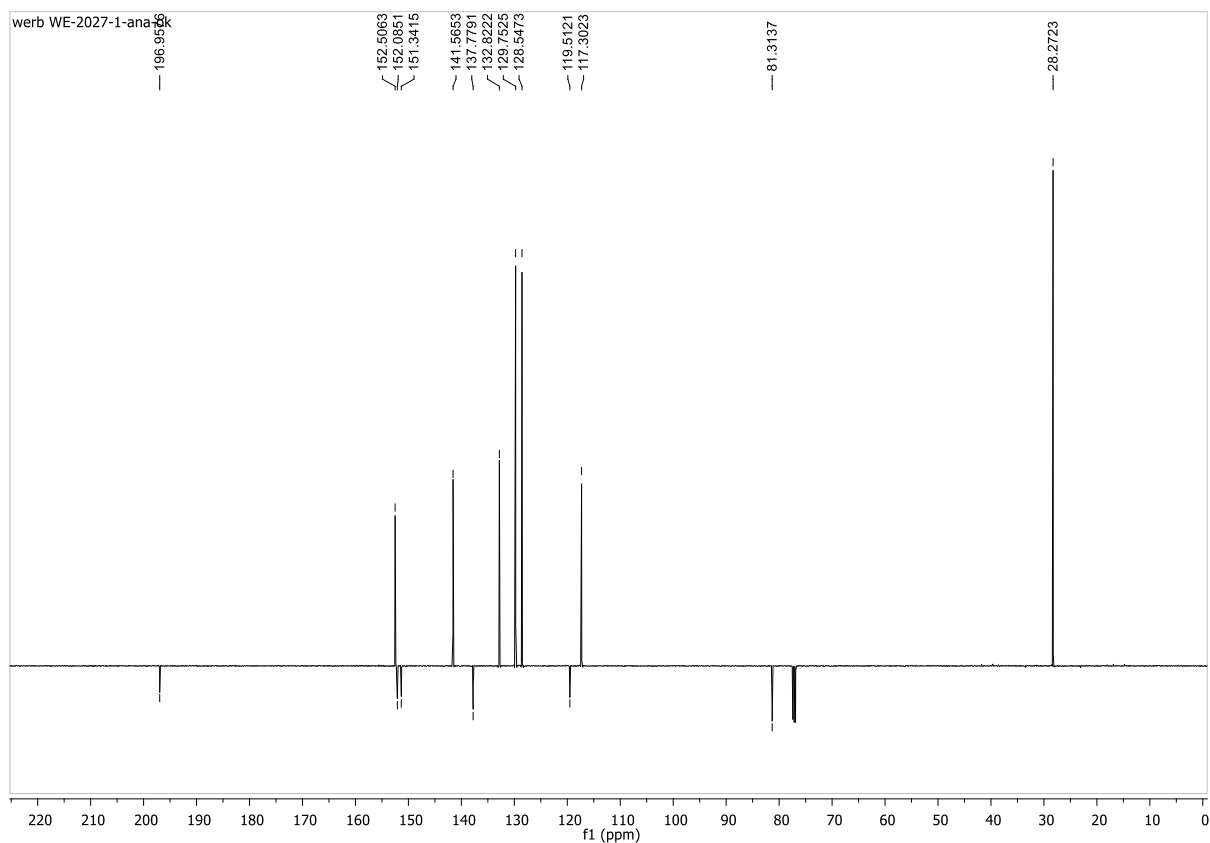

### 3-Benzoyl-2-((tert-butoxycarbonyl)(methoxymethyl)amino)pyridine (31)

$^1\text{H}$  ( $\text{CDCl}_3$ , 300 K, 500 MHz)

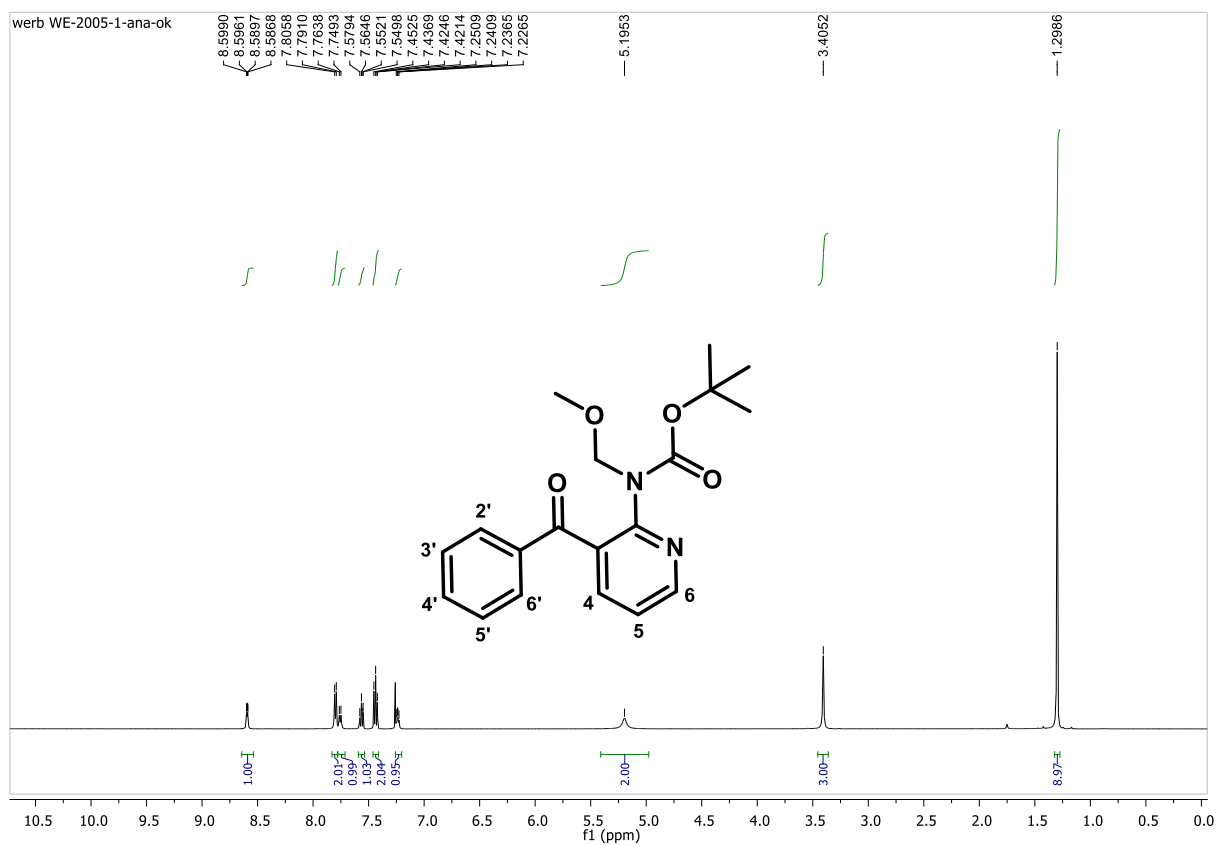

JMOD ( $\text{CDCl}_3$ , 300 K, 126 MHz)

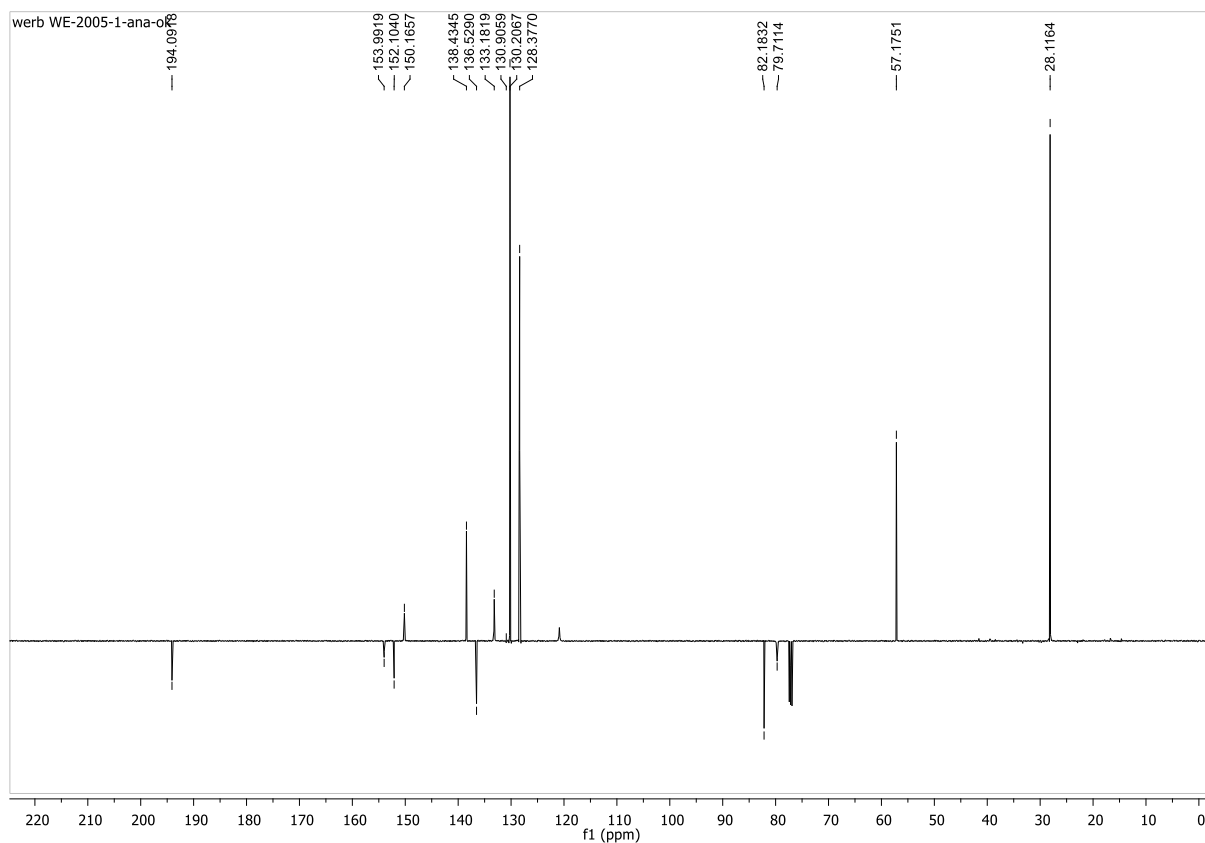

### 3-Benzoyl-2-((*tert*-butoxycarbonyl)(methoxymethyl)amino)-4-(methylthio)pyridine (32)

$^1\text{H}$  ( $\text{CDCl}_3$ , 300 K, 500 MHz)

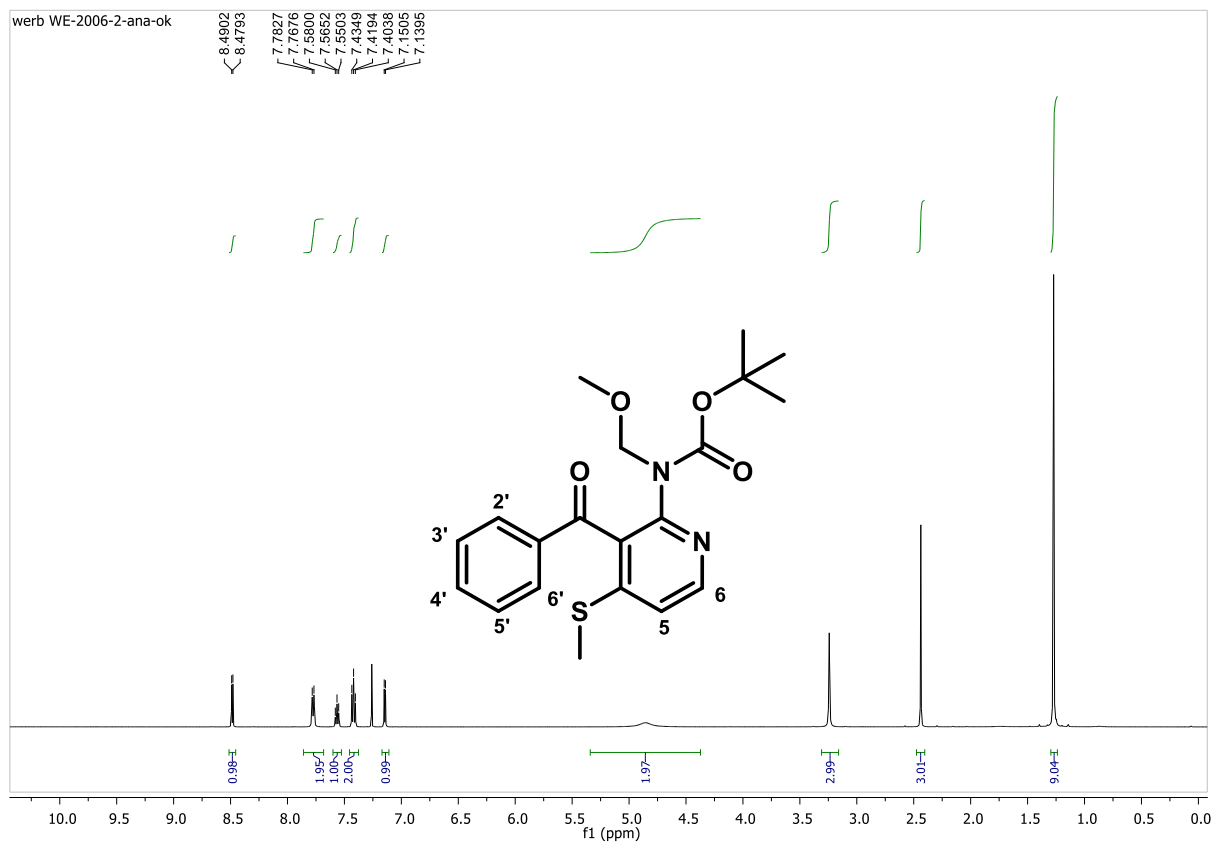

JMOD ( $\text{CDCl}_3$ , 300 K, 126 MHz)

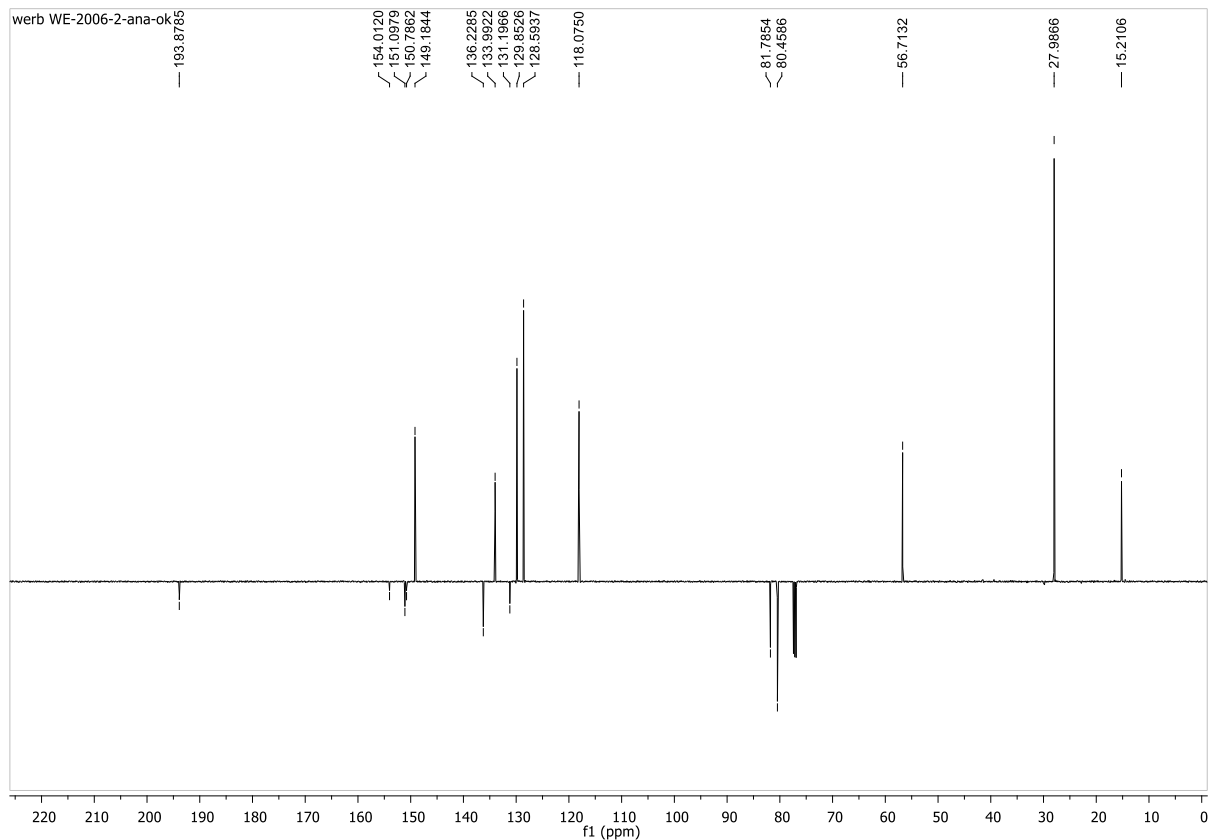



## 2-Amino-3-benzoyl-4-(methylthio)pyridine (20)

$^1\text{H}$  ( $\text{CDCl}_3$ , 300 K, 500 MHz)

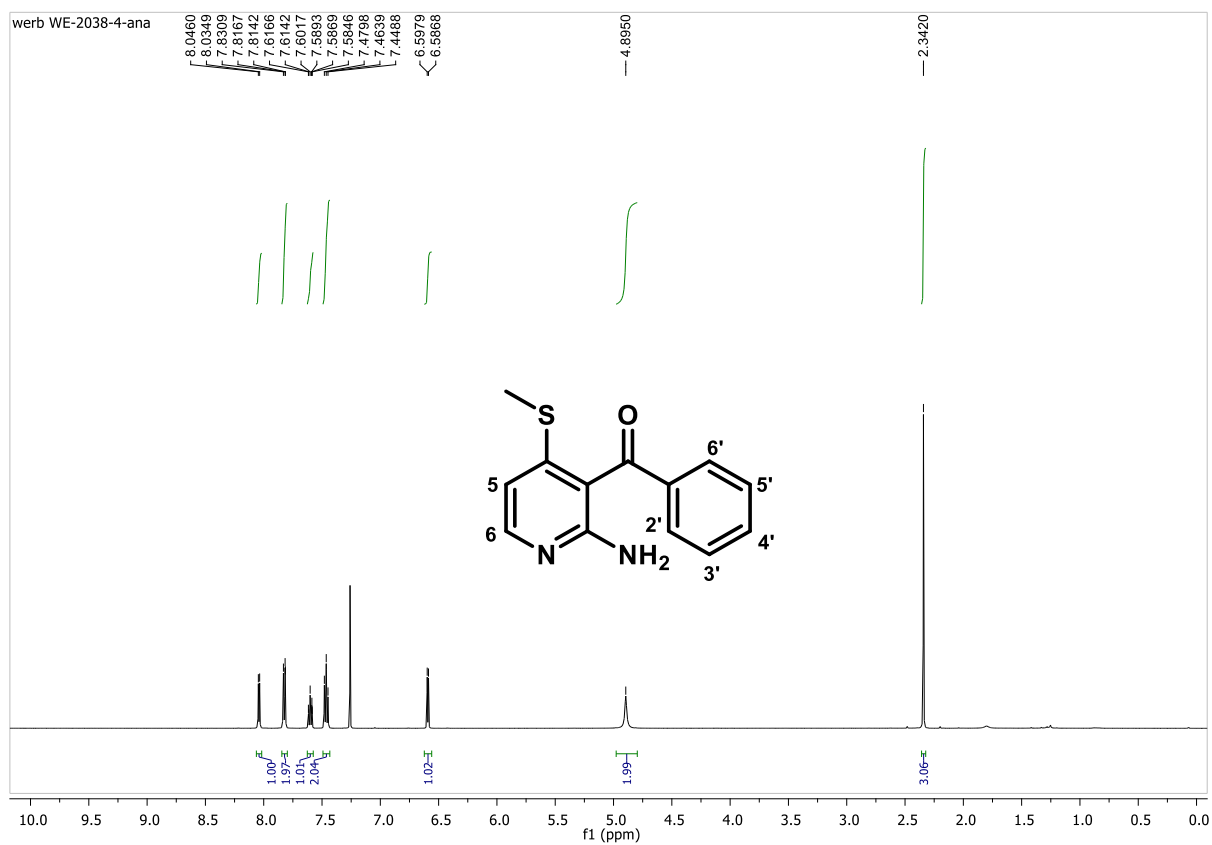

JMOD ( $\text{CDCl}_3$ , 300 K, 126 MHz)

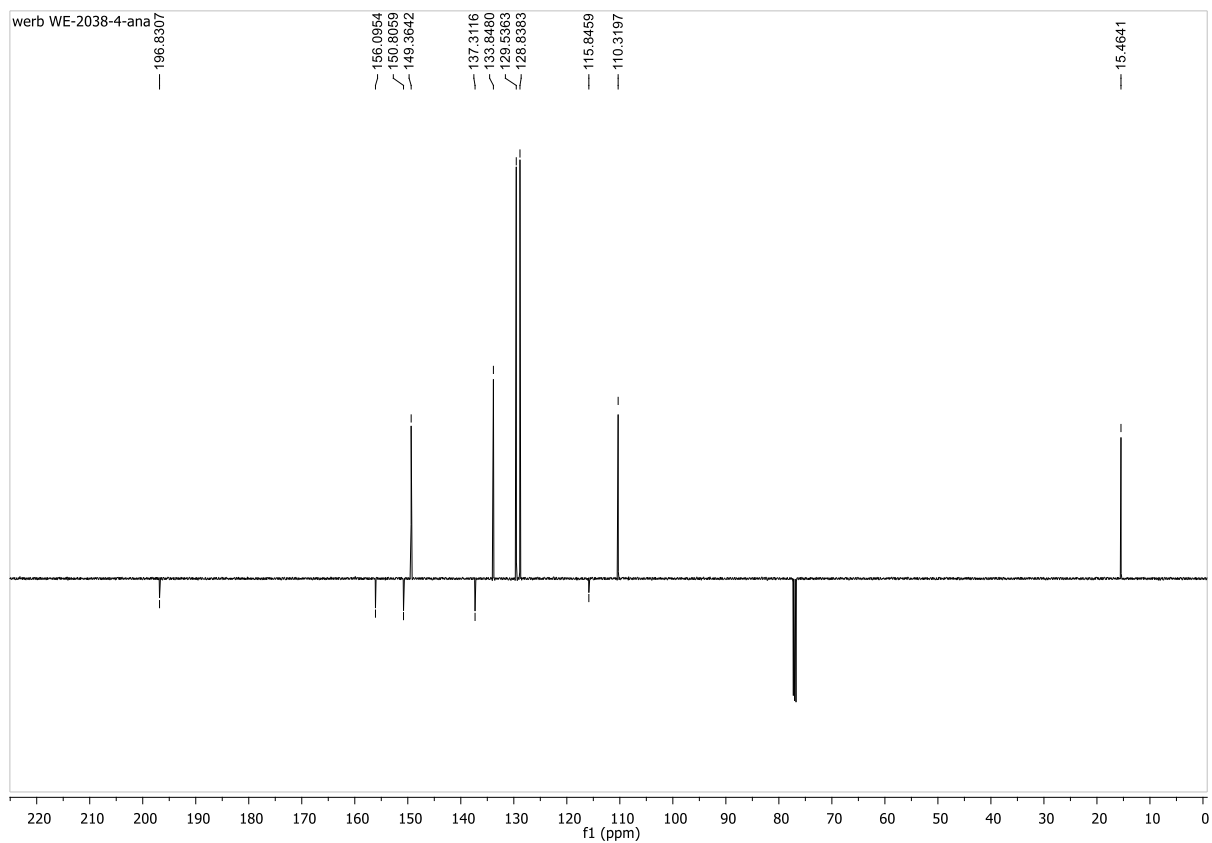

### 3-Benzoyl-2-imino-4-(methylthio)-1,2-dihydropyridine (20')

$^1\text{H}$  ( $\text{CDCl}_3$ , 300 K, 500 MHz)

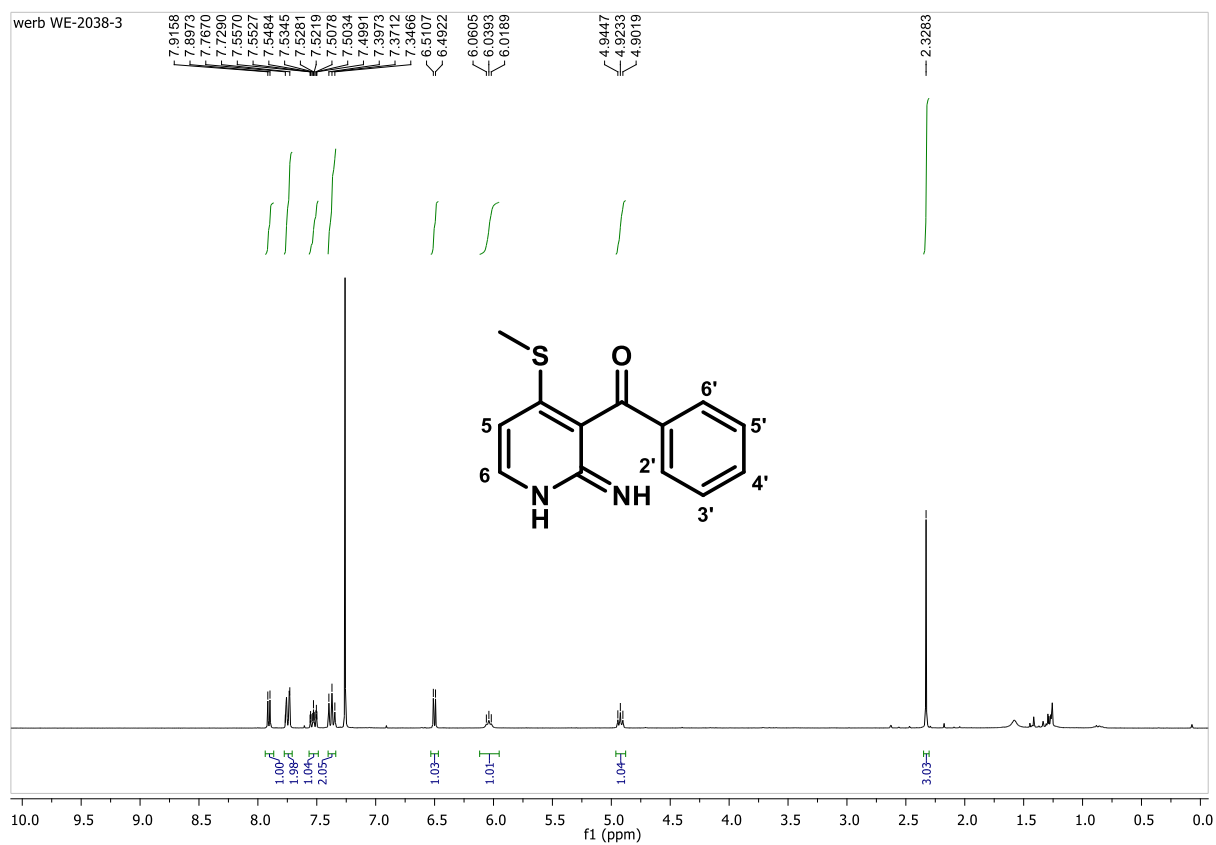

JMOD (CDCl<sub>3</sub>, 300 K, 126 MHz)

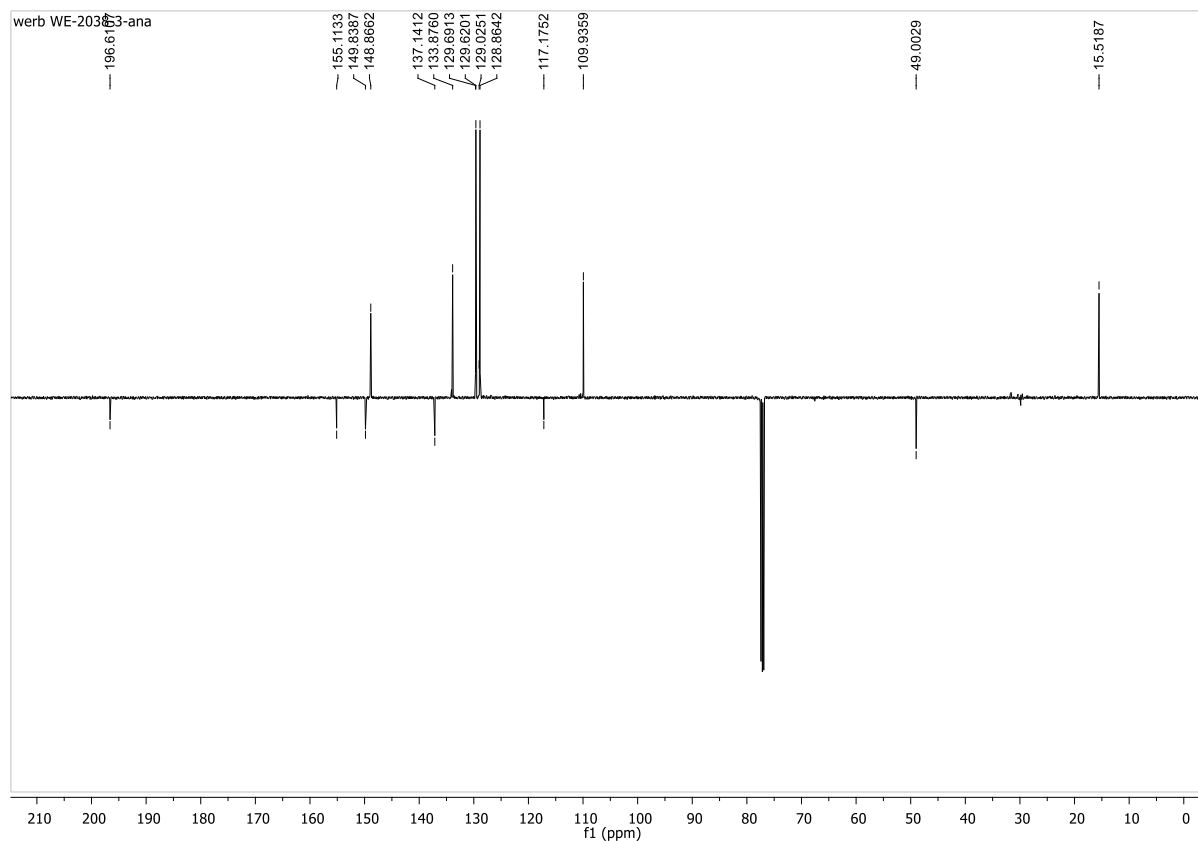

# 5-Methyl-10-(methylthio)-11-phenylindolo[2,3-*b*]1,8-naphthyridine (33)

$^1\text{H}$  (CDCl<sub>3</sub>, 300 K, 500 MHz)

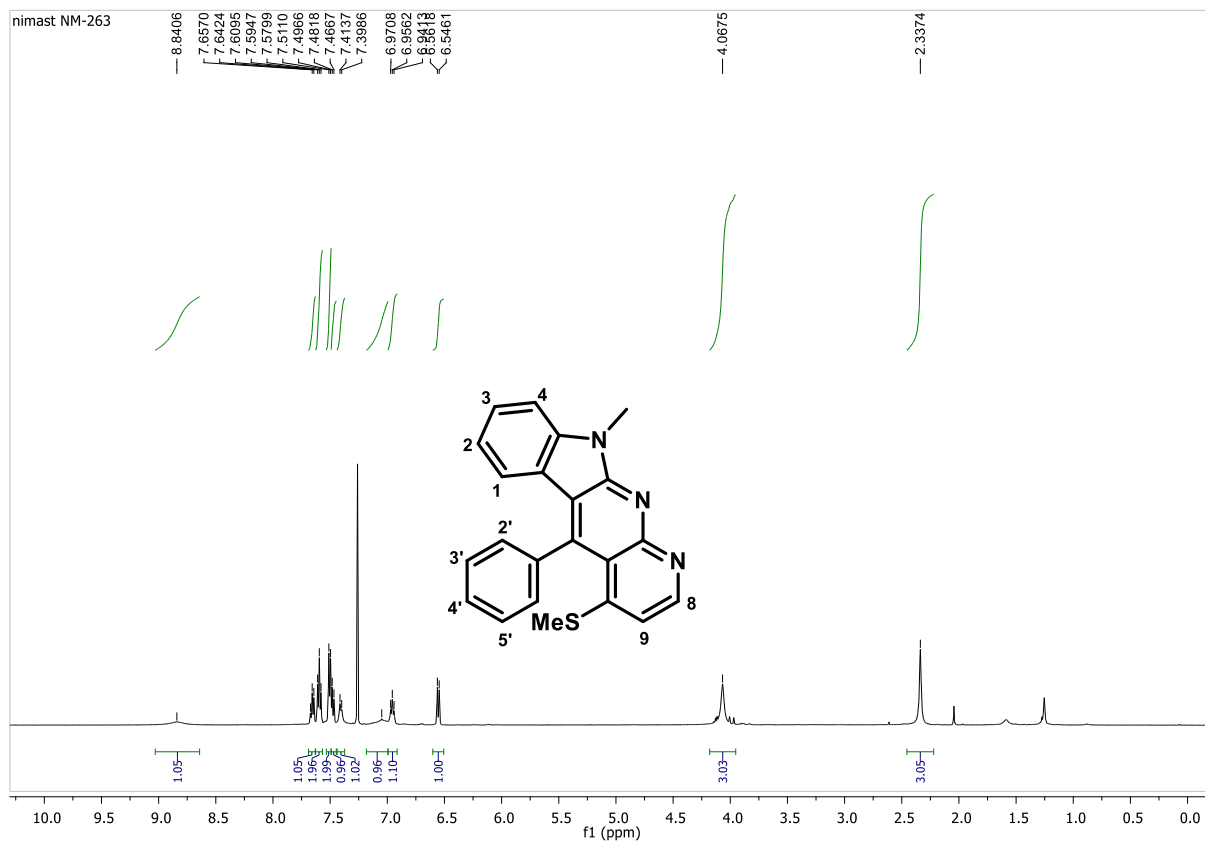

JMOD (CDCl<sub>3</sub>, 300 K, 126 MHz)

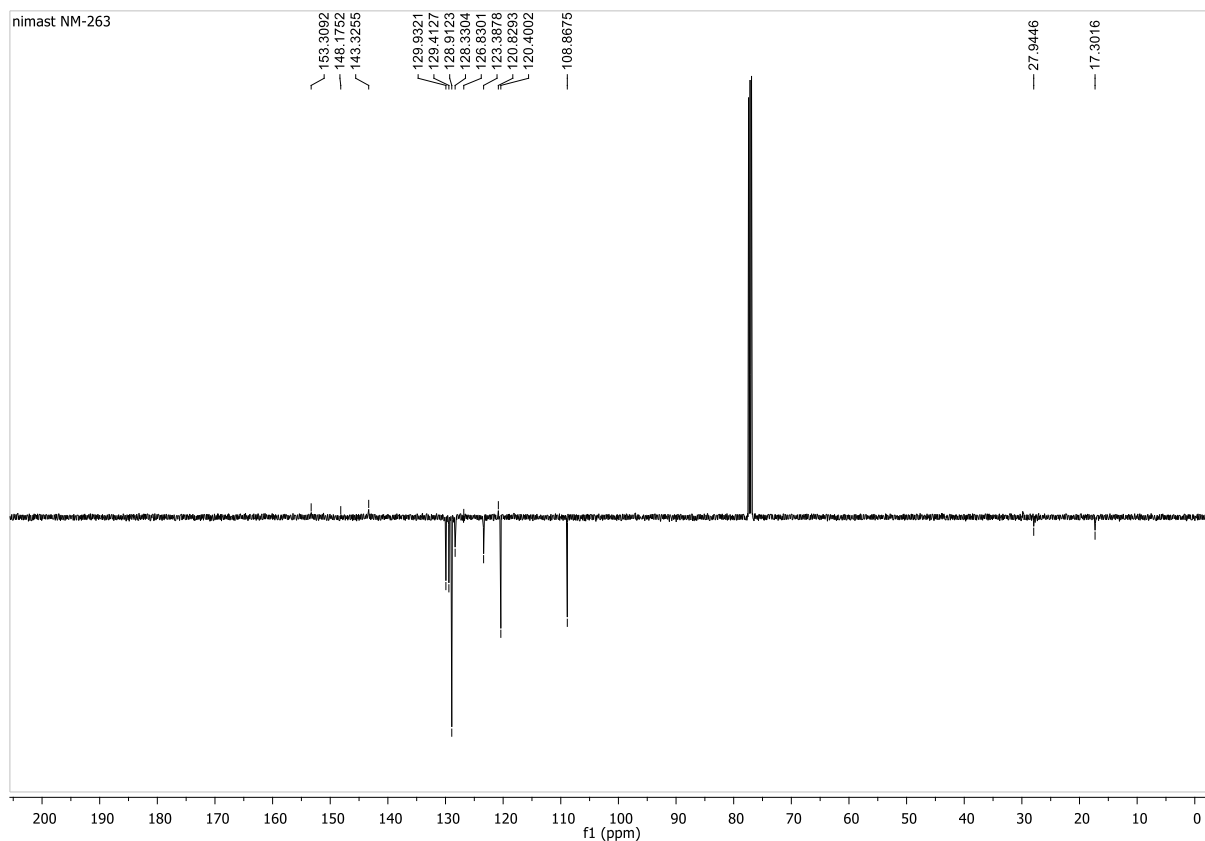

# 5-Methyl-10-(methylsulfinyl)-11-phenylindolo[2,3-*b*]1,8-naphthyridine (34)

$^1\text{H}$  (CDCl<sub>3</sub>, 300 K, 500 MHz)

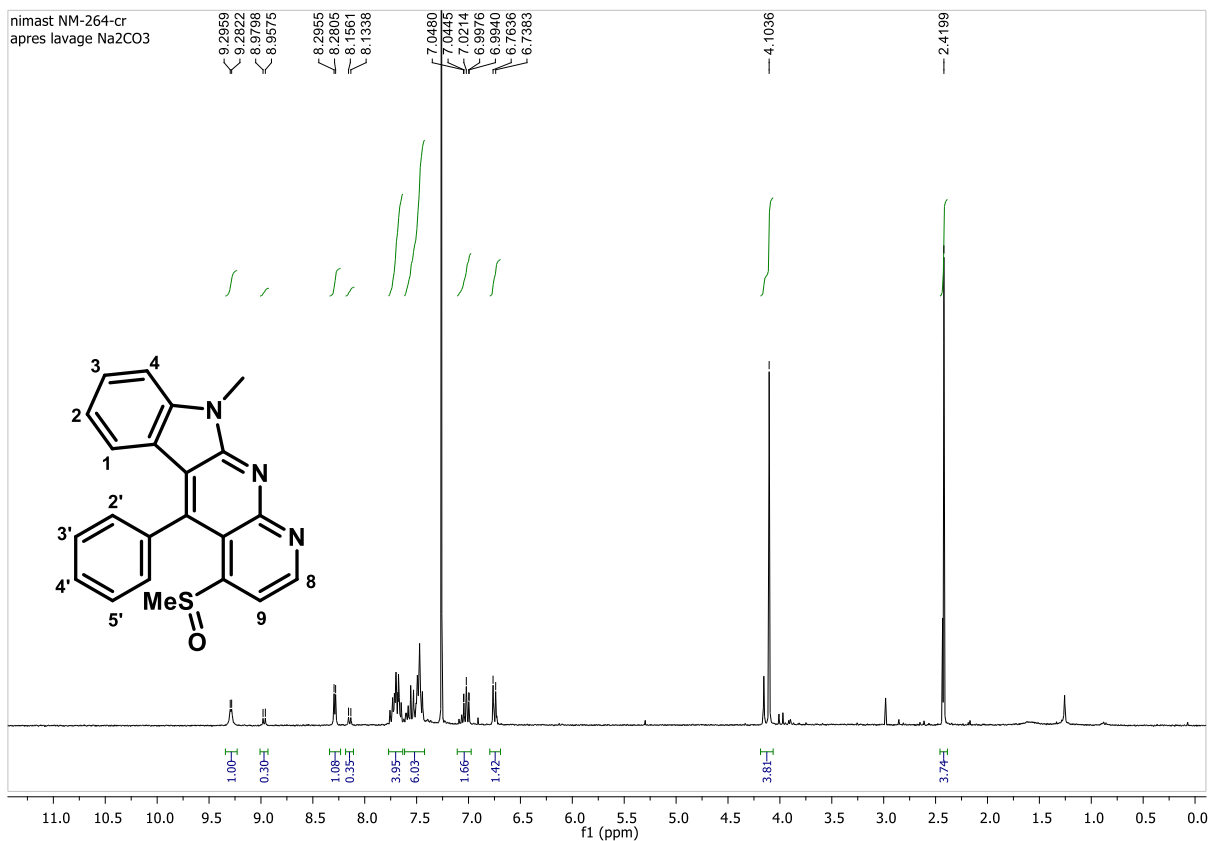

$^1\text{H}$  ((CD<sub>3</sub>)<sub>2</sub>SO, 375 K, 500 MHz)

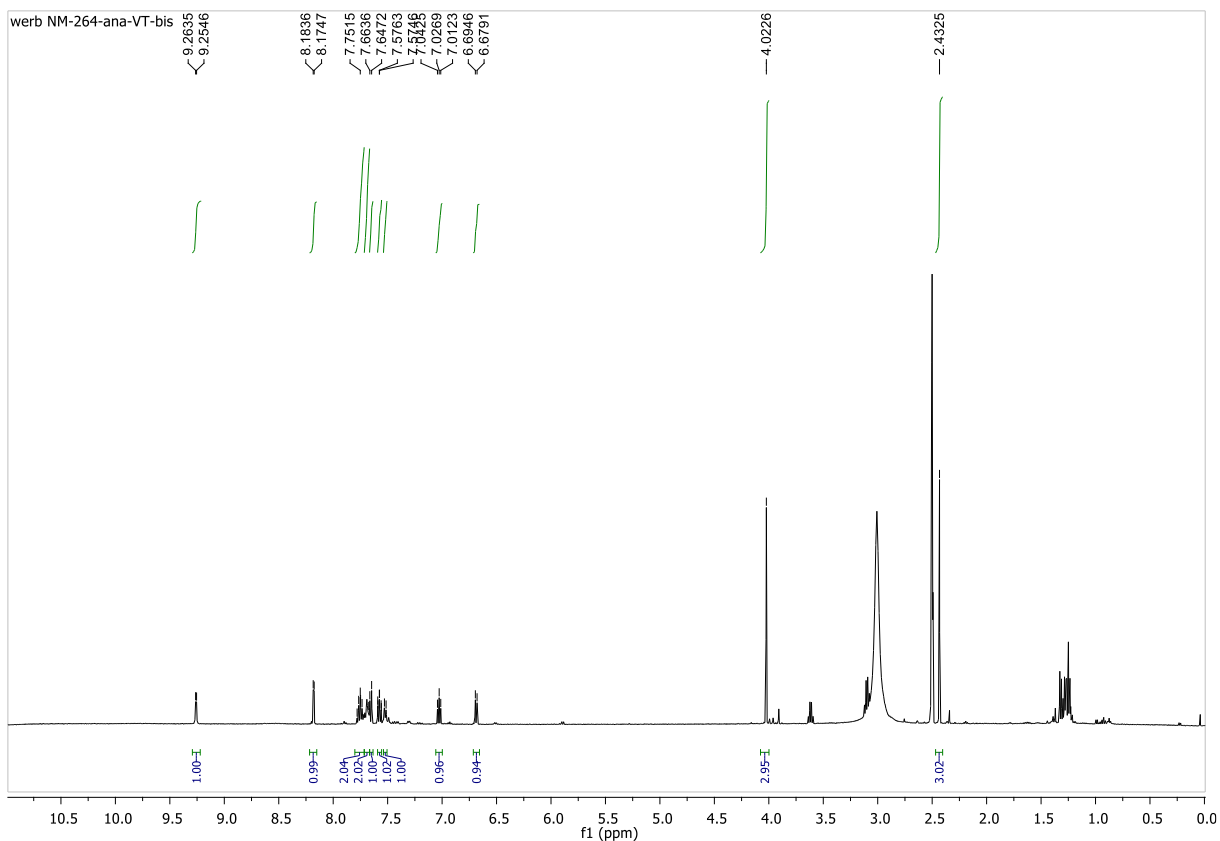

JMOD ((CD<sub>3</sub>)<sub>2</sub>SO, 300 K, 126 MHz)

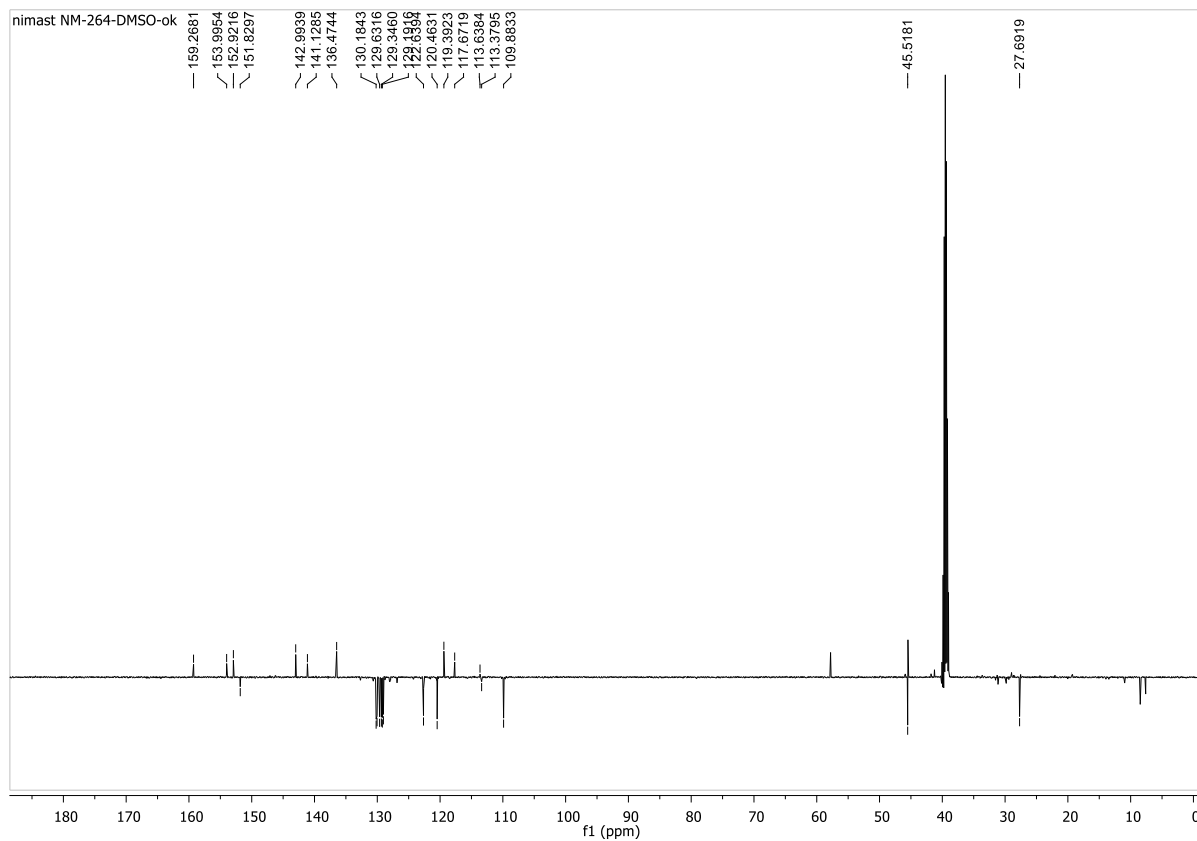

**Putative 10-Methyl-5-phenyl-1,10-dihydro-4H-indolo[2,3-b]1,8-naphthyridin-4-one (34')**

$^1\text{H}$  (( $\text{CD}_3$ ) $_2\text{SO}$ , 300 K, 500 MHz)

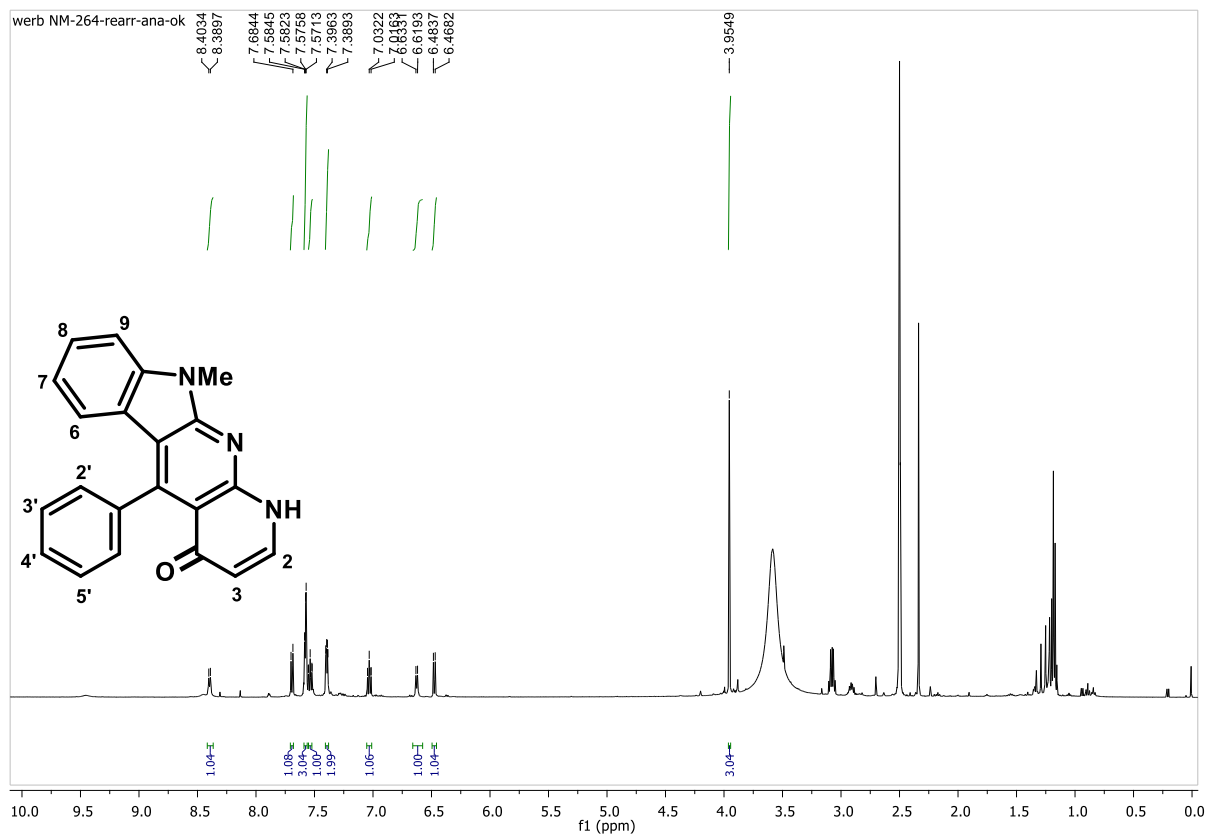

JMOD (( $\text{CD}_3$ ) $_2\text{SO}$ , 300 K, 126 MHz)

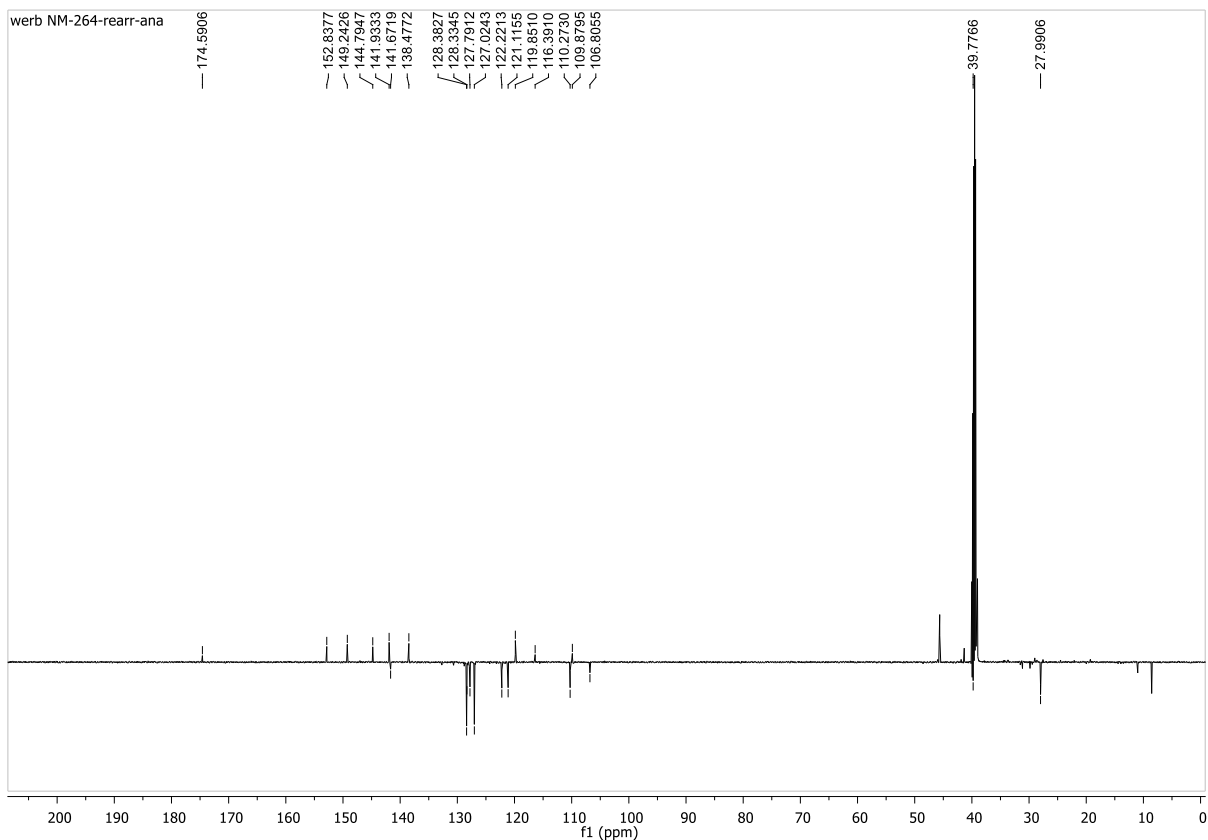

# 2-Chloro-4-fluoro-3-(1-(2-fluorophenyl)hydroxymethyl)pyridine (36)

$^1\text{H}$  (CDCl<sub>3</sub>, 300 K, 500 MHz)

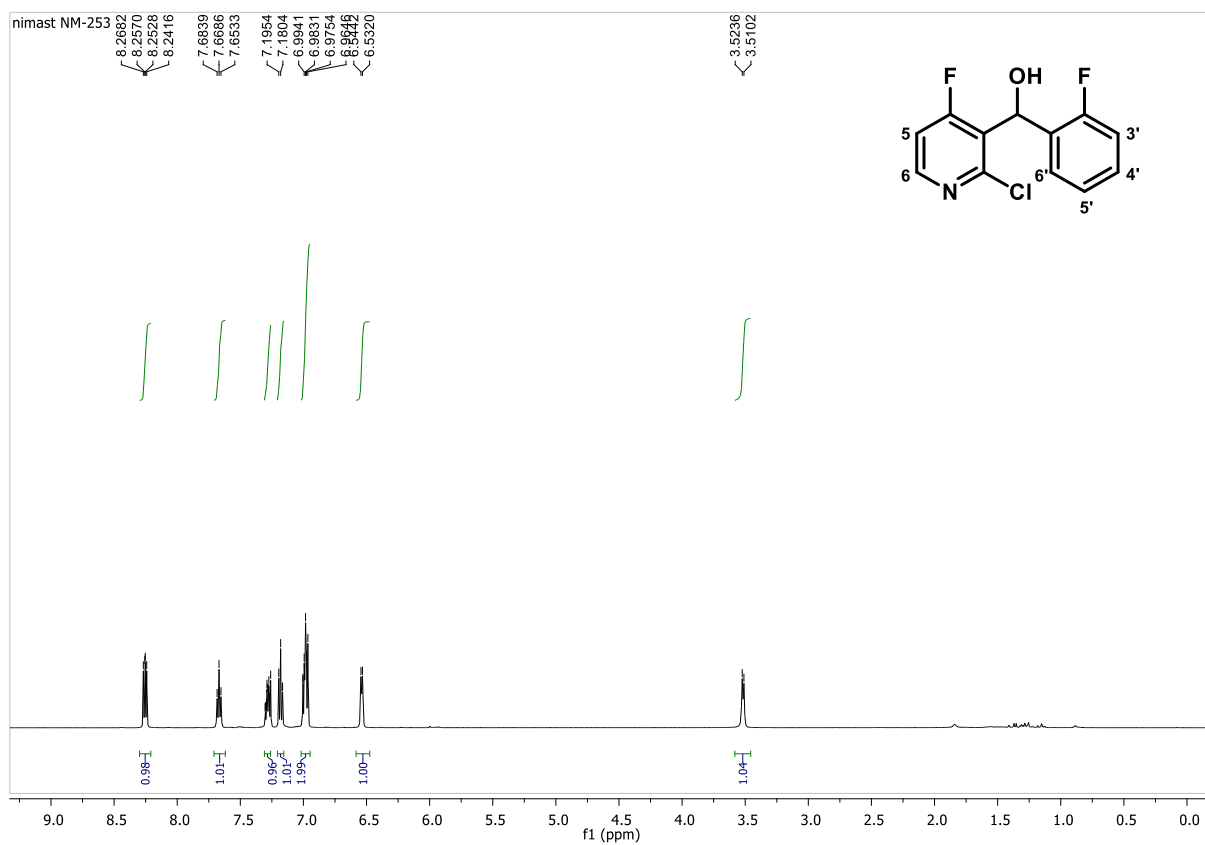

JMOD (CDCl<sub>3</sub>, 300 K, 126 MHz)

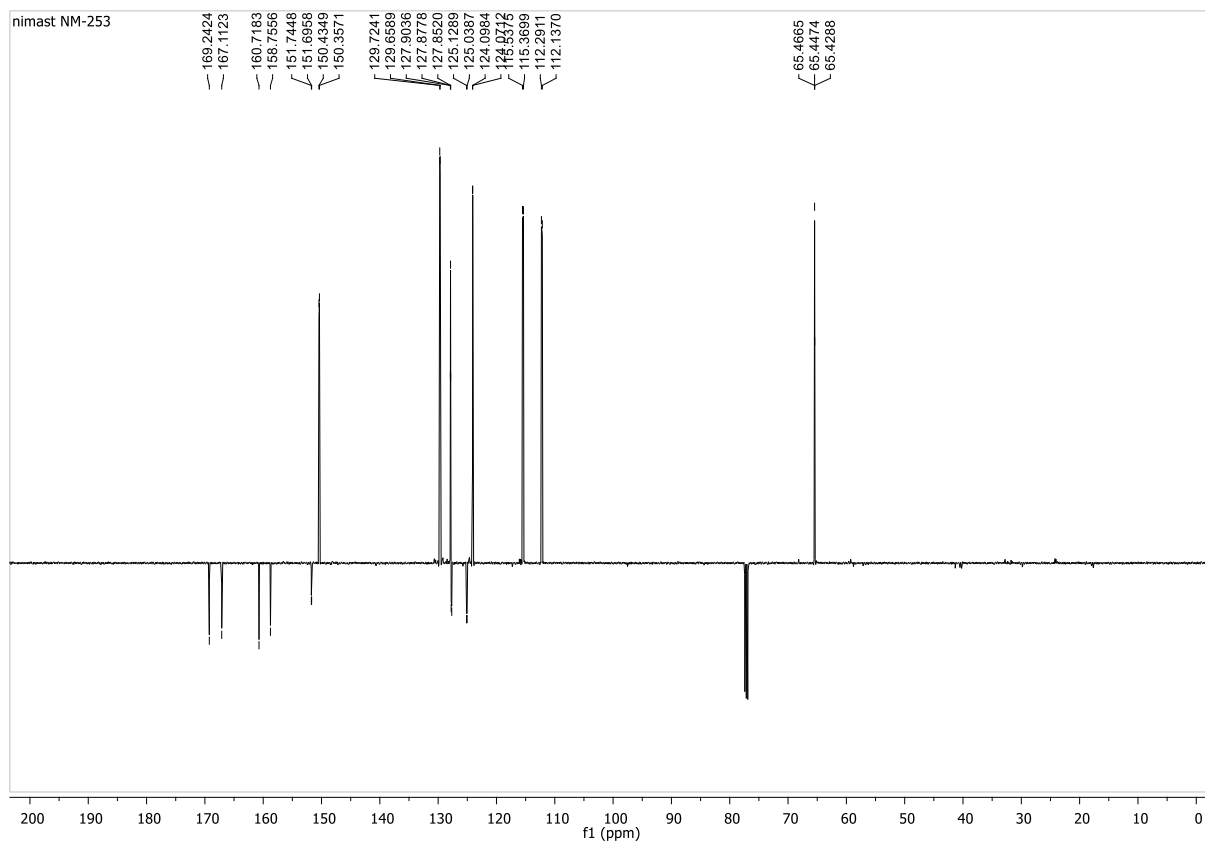

$^{19}\text{F}$  ( $\text{CDCl}_3$ , 300 K, 471 MHz)

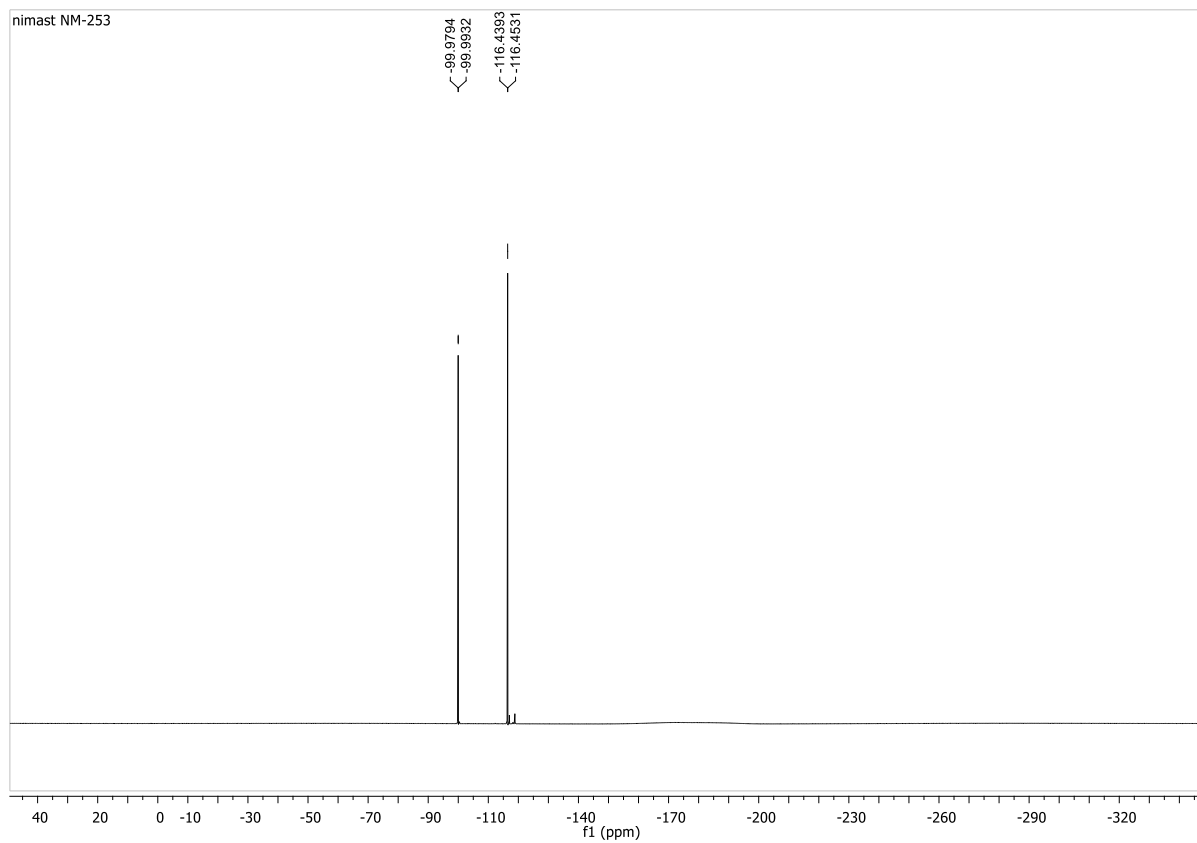



# 2-Chloro-4-fluoro-3-(2-fluorobenzoyl)pyridine (37)

$^1\text{H}$  ( $\text{CDCl}_3$ , 300 K, 300 MHz)

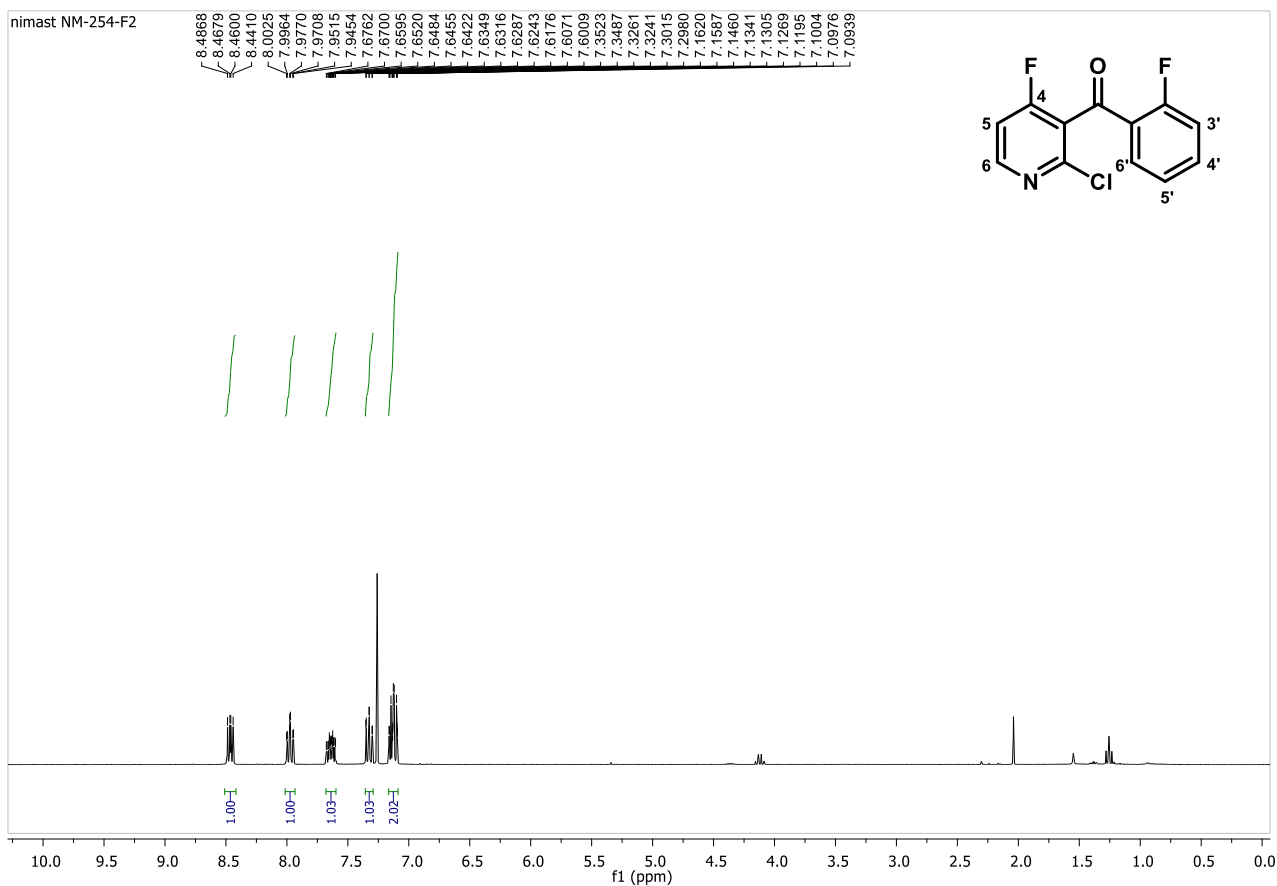

JMOD ( $\text{CDCl}_3$ , 300 K, 75 MHz)

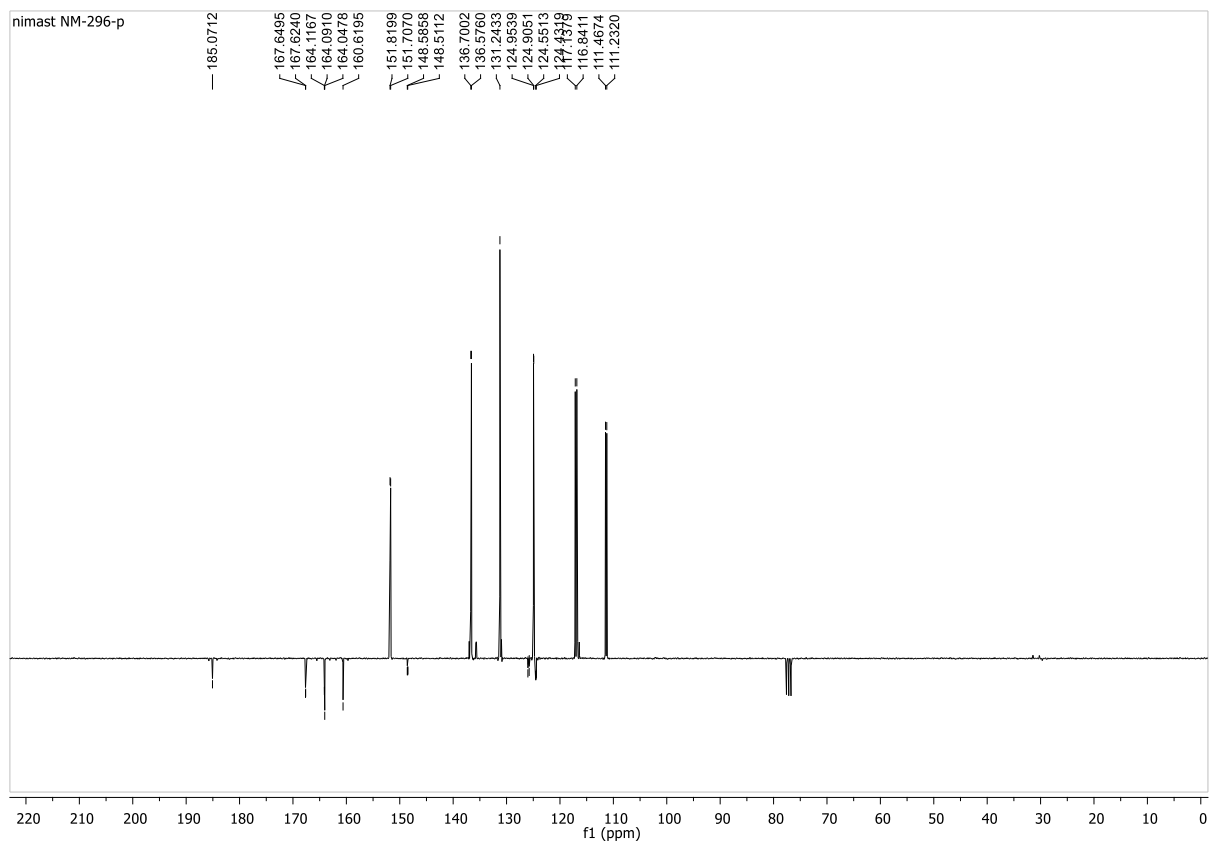

$^{19}\text{F}$  ( $\text{CDCl}_3$ , 300 K, 282 MHz)

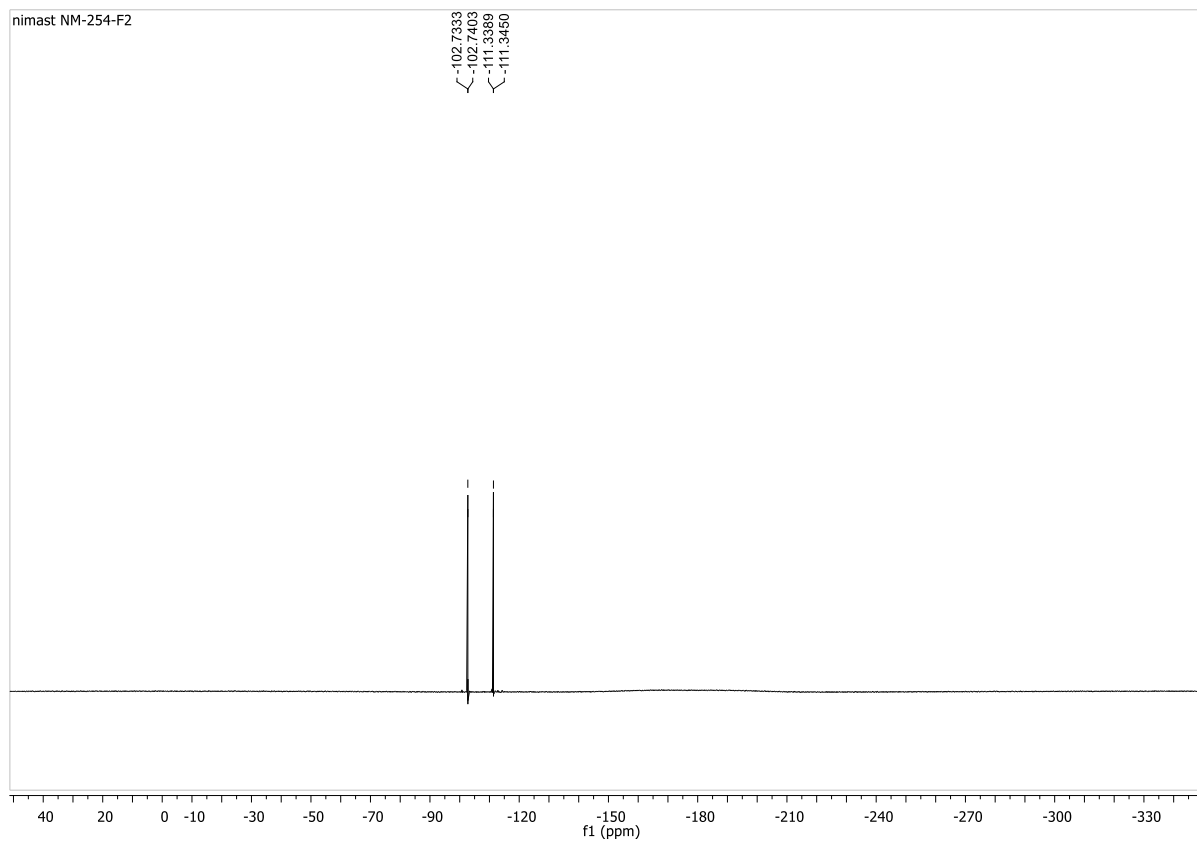

# Benzofuro[2,3-*b*]benzothiopyrano[4,3,2-*de*]1,8-naphthyridine (28)

$^1\text{H}$  (CDCl<sub>3</sub>, 300 K, 500 MHz)

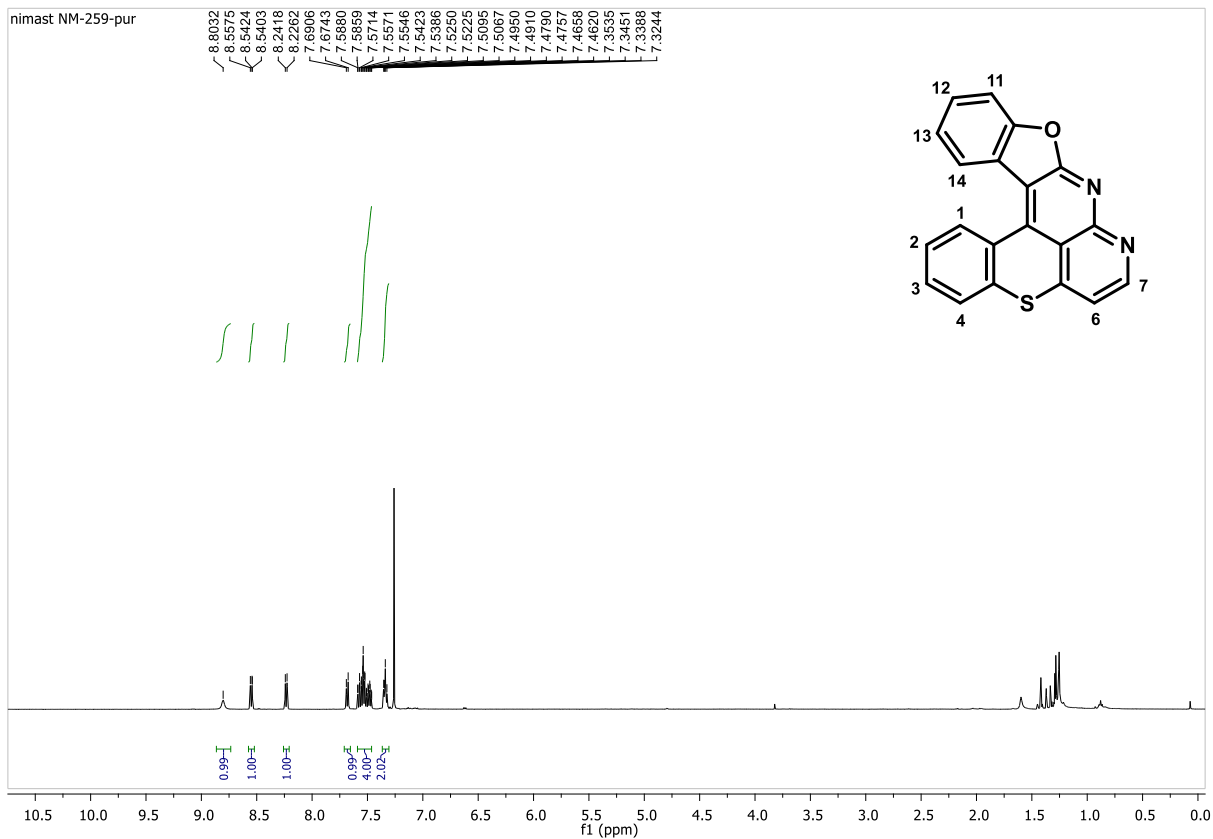

JMOD (CDCl<sub>3</sub>, 300 K, 126 MHz)

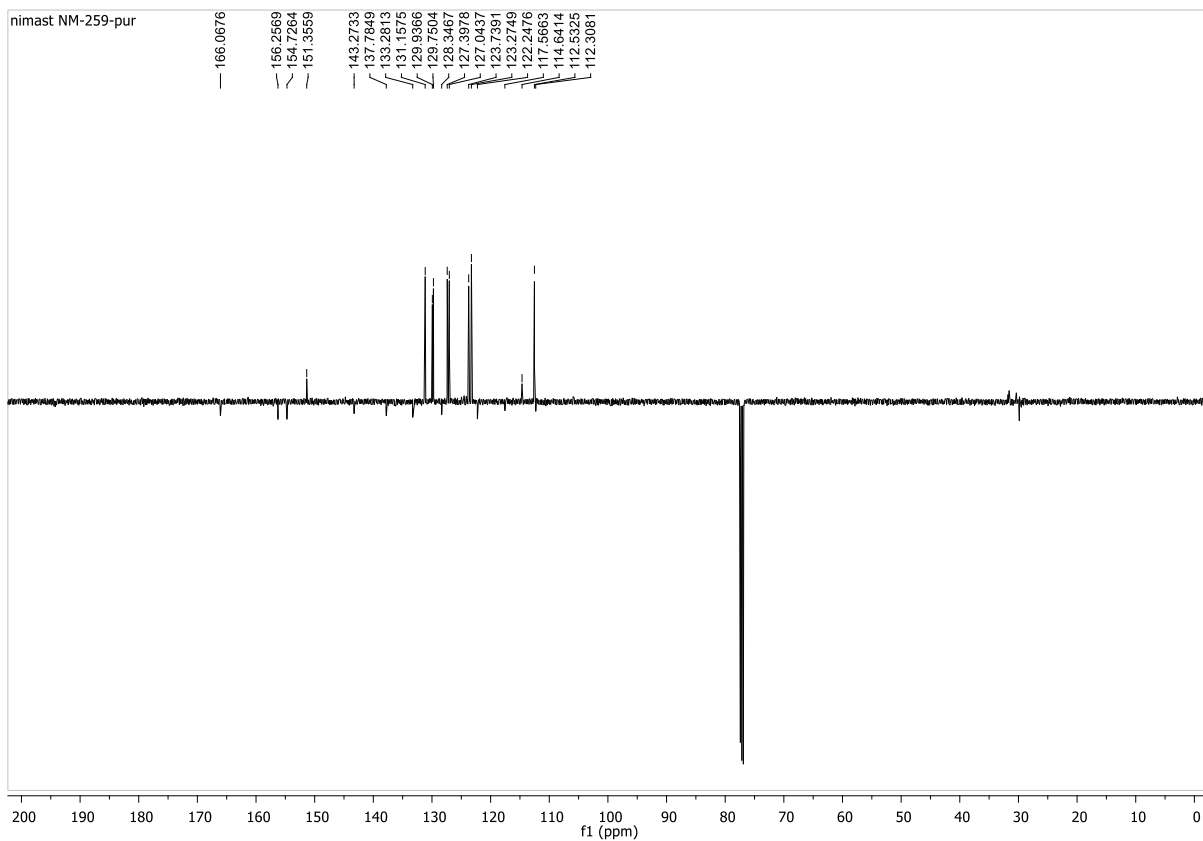

# Benzothieno[2,3-*b*]benzothiopyrano[4,3,2-*de*]1,8-naphthyridine (39)

$^1\text{H}$  ( $\text{CDCl}_3$ , 300 K, 500 MHz)

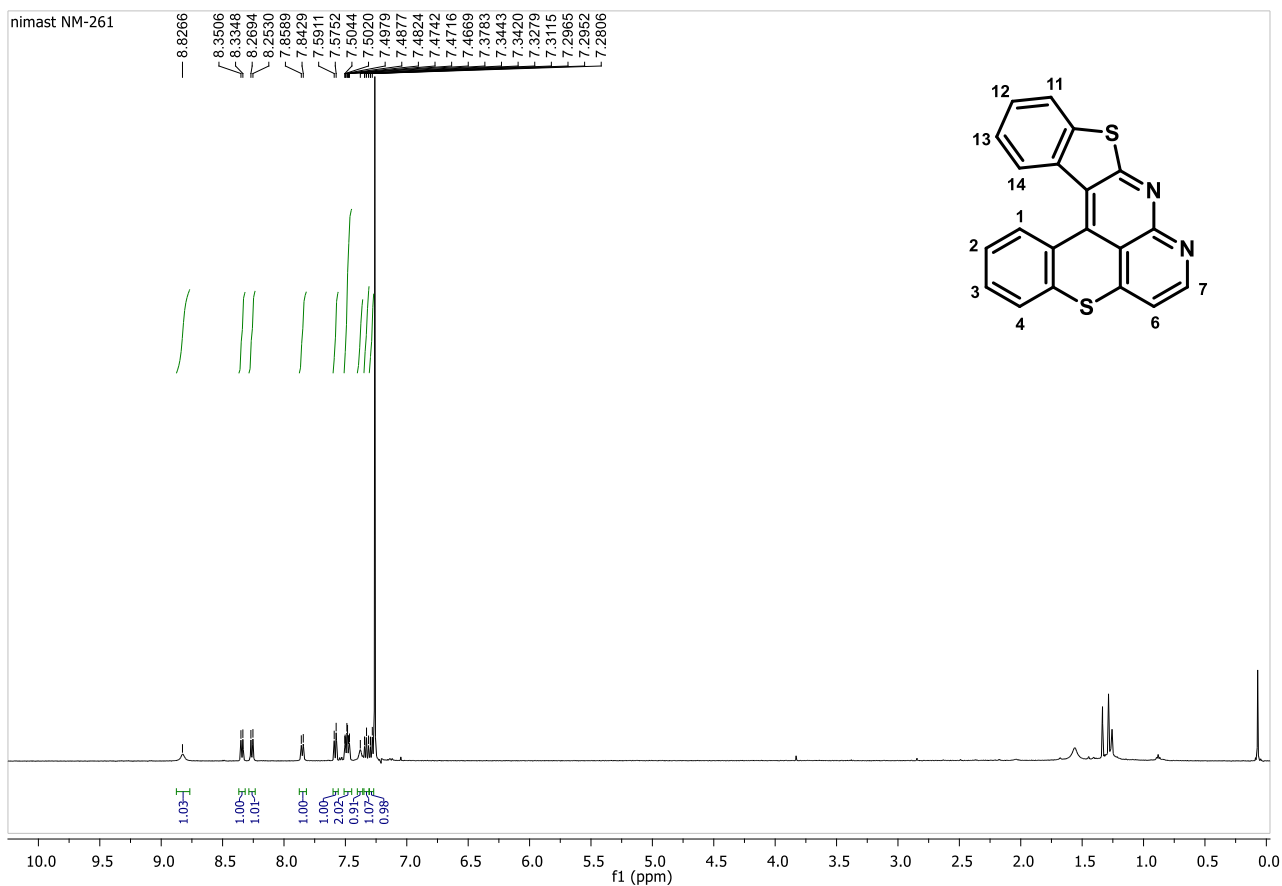

JMOD ( $\text{CDCl}_3$ , 300 K, 126 MHz)

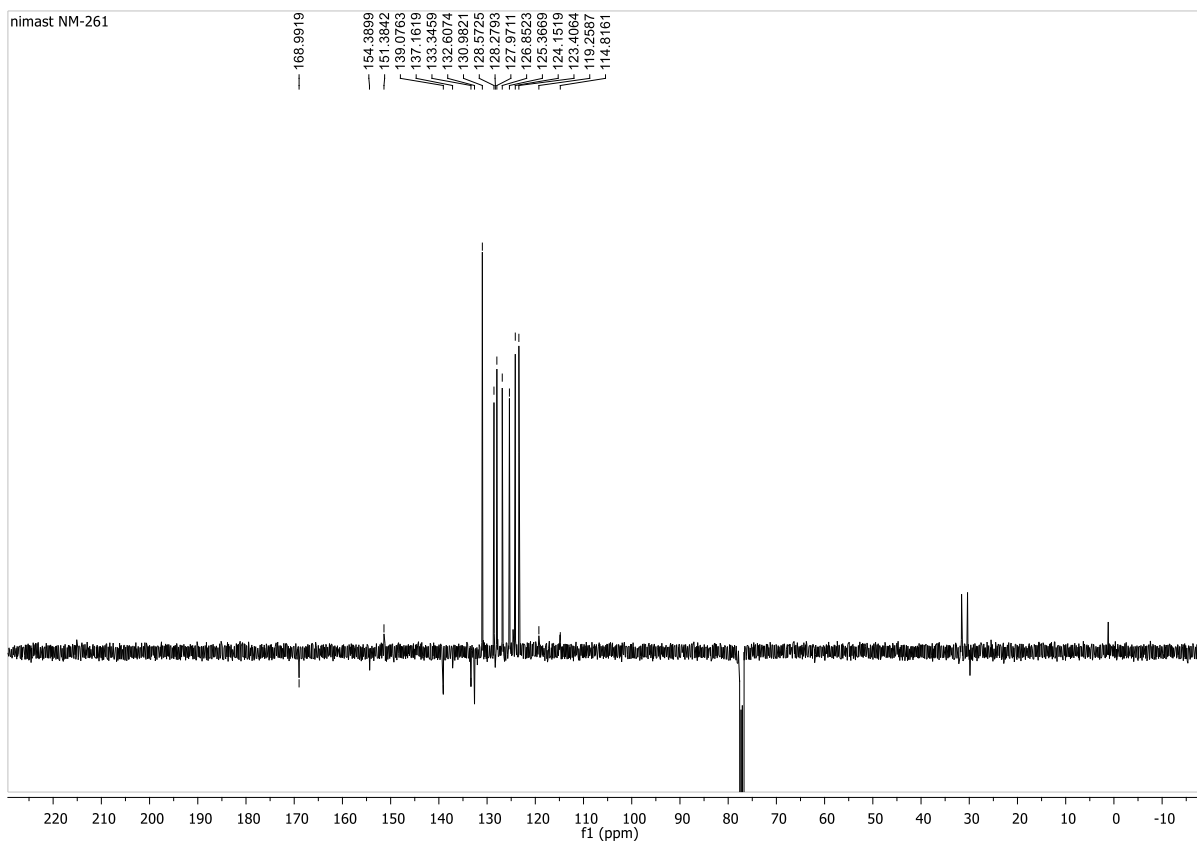

# 11-Methylbenzothiopyrano[4,3,2-de]indolo[2,3-b]1,8-naphthyridine (35)

$^1\text{H}$  ( $(\text{CD}_3)_2\text{SO}$ , 375 K, 500 MHz)

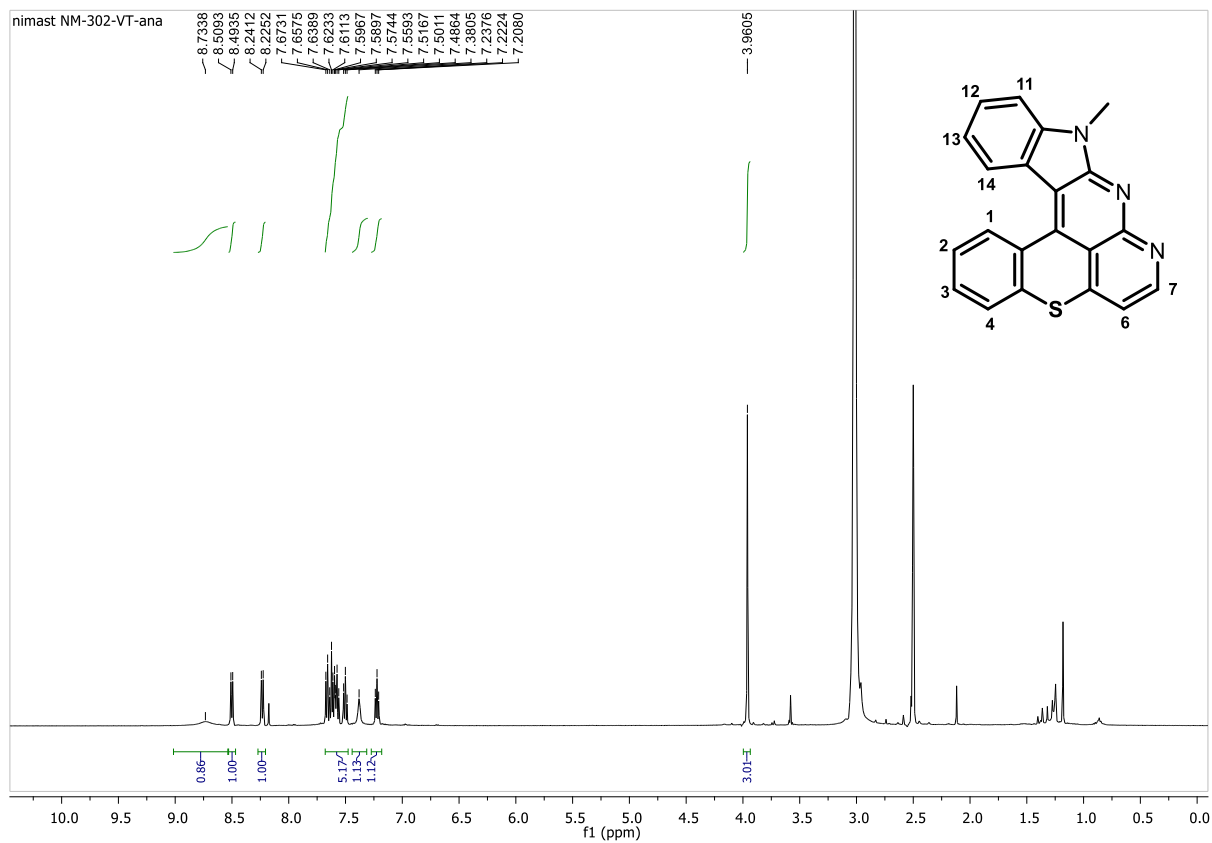

JMOD ( $(\text{CD}_3)_2\text{SO}$ , 375 K, 126 MHz)

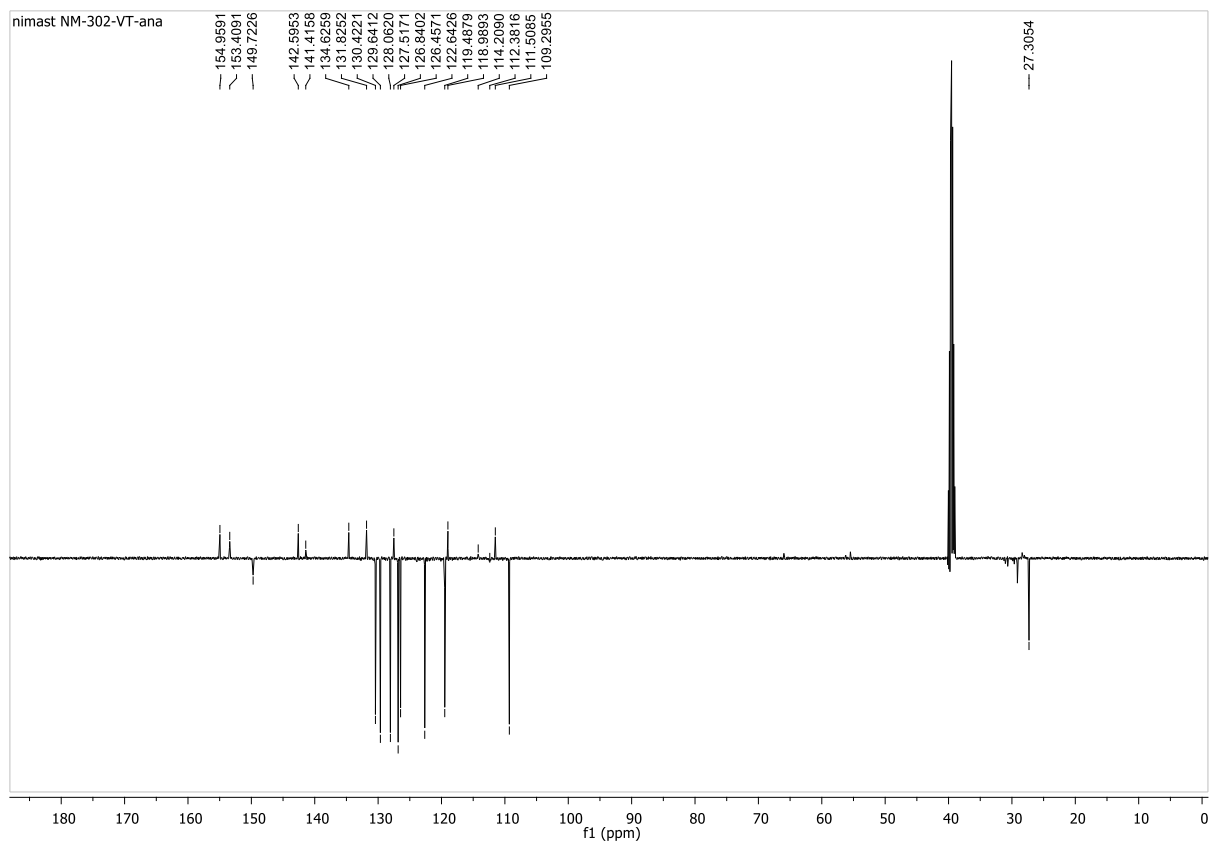

## Titration curves for IC<sub>50</sub> determination

### Compound NM-049

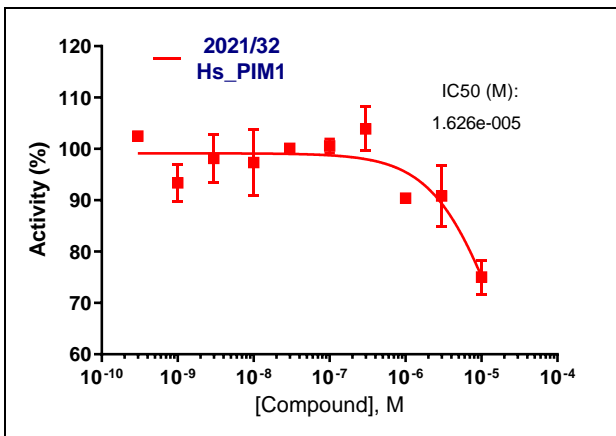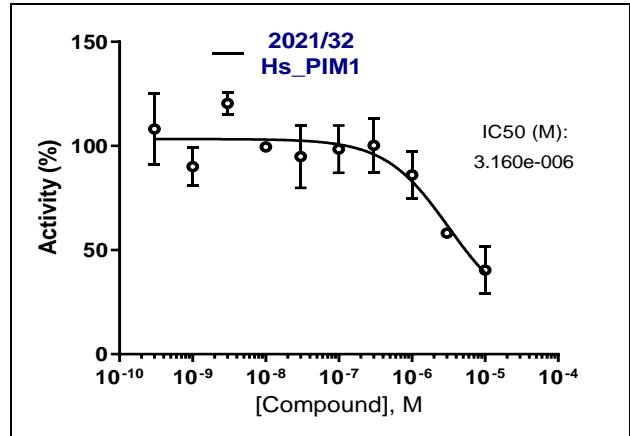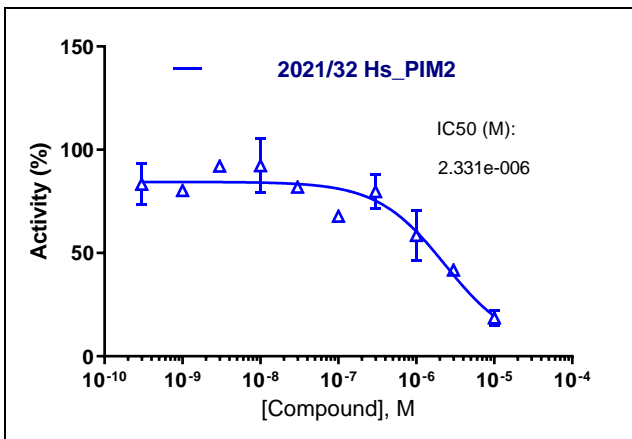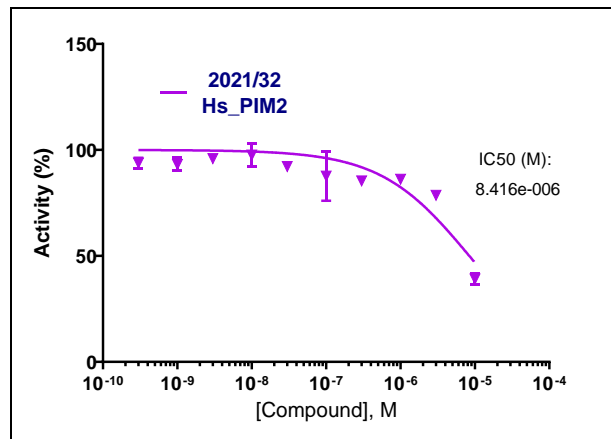

### Compound MN65-45

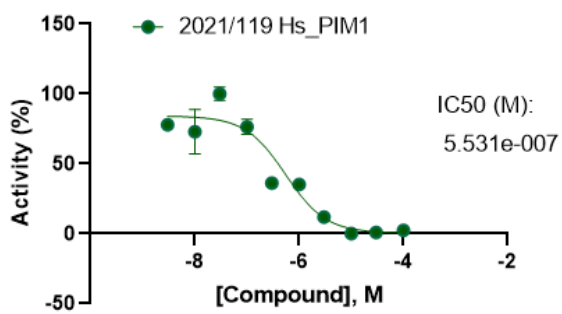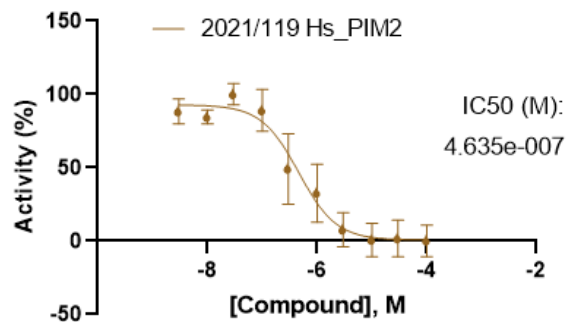

### Compound MN64-44

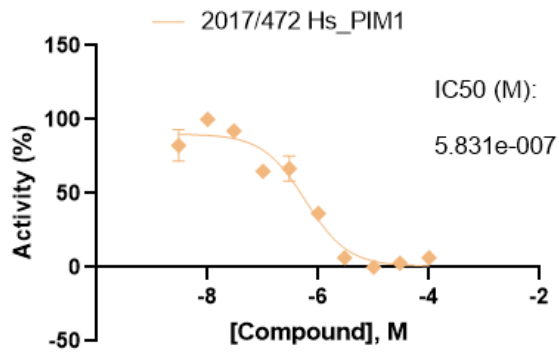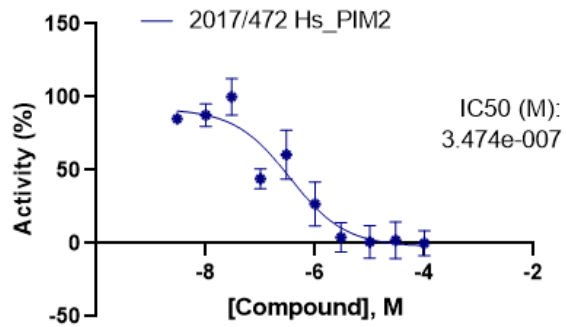

### Compound 33 or NM-263

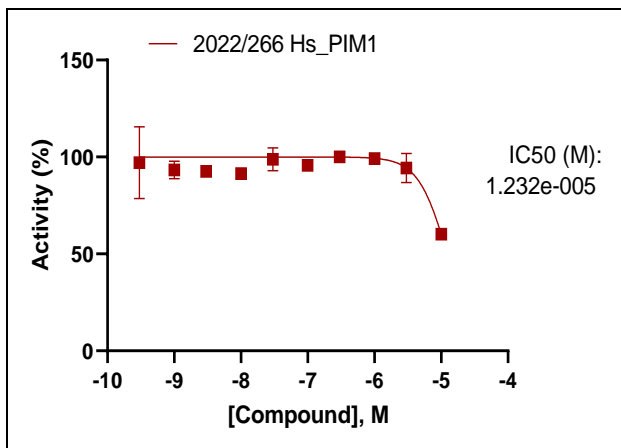

### Compound 13 or NM-022

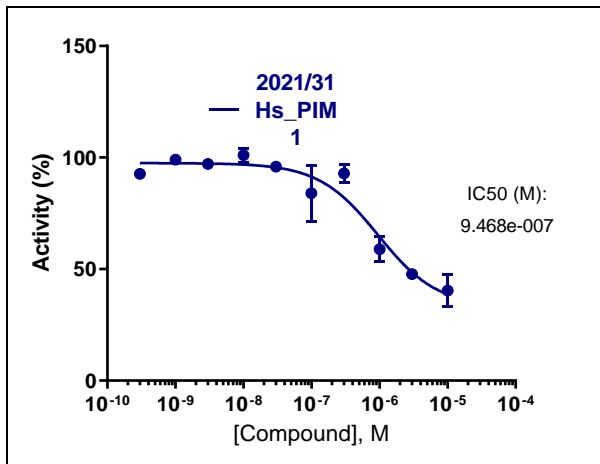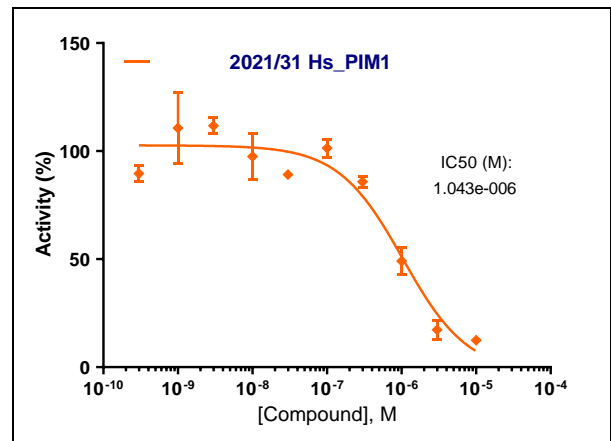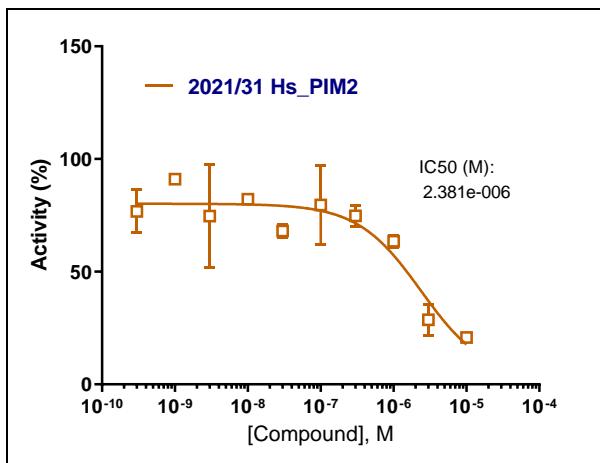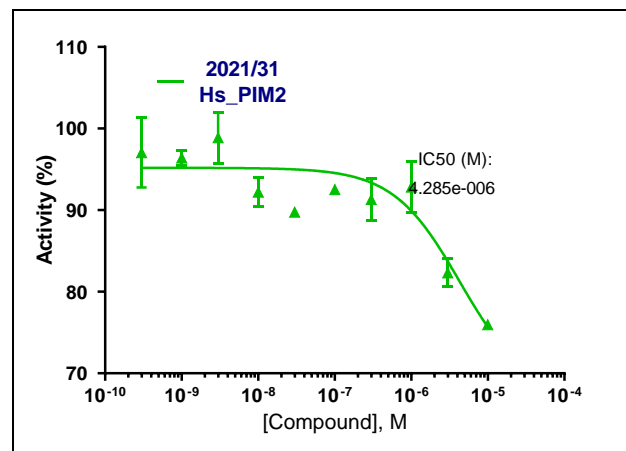

### Compound 39 or NM-261

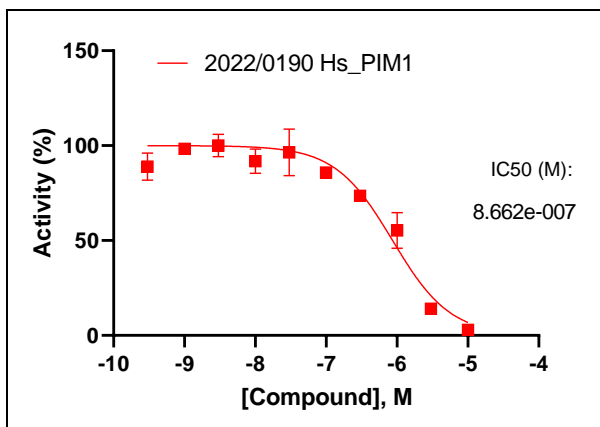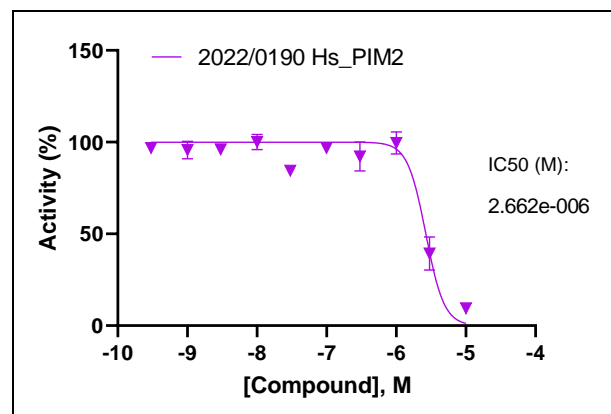



### Compound 28 or NM-259

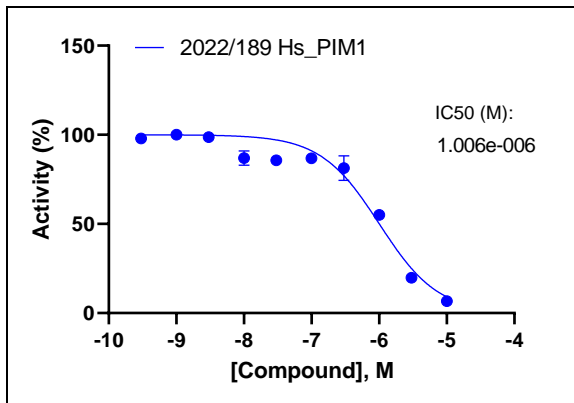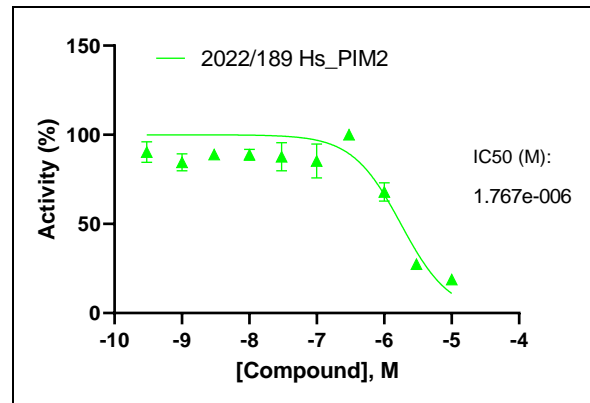

### Compound 35 or NM-302

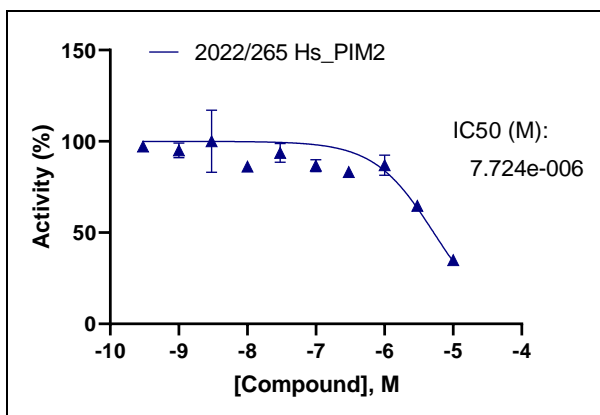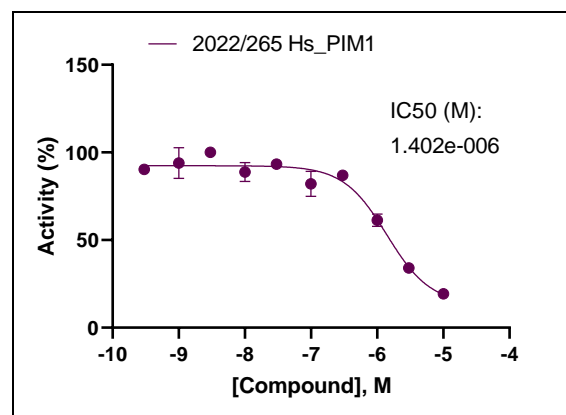

Supplement: d2nj04567b1.pdf [file d2nj04567b1.pdf]
